# Supplementary material
Source: PubMed Central journal article supplement (PMC2590943)

# Regard et al. Mouse GPCRs Page 1

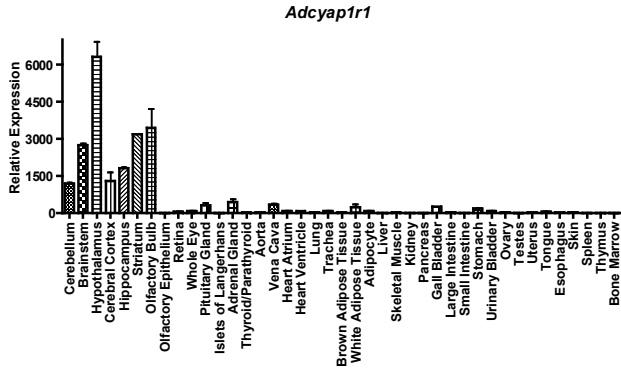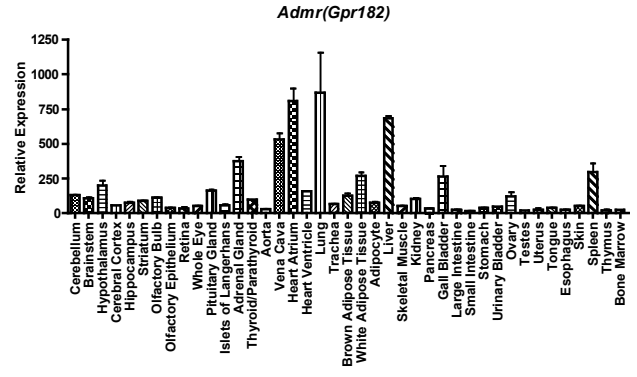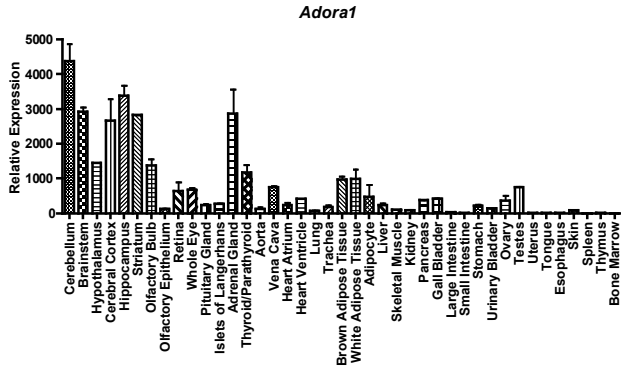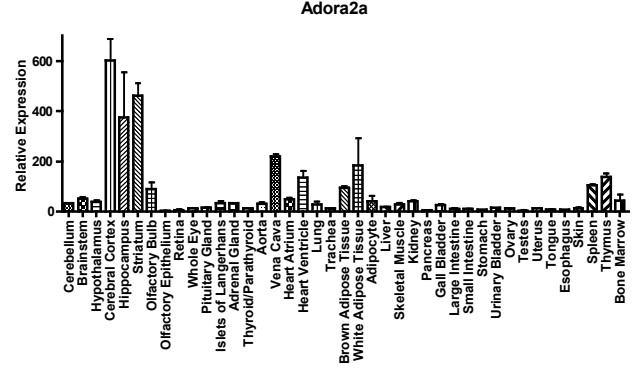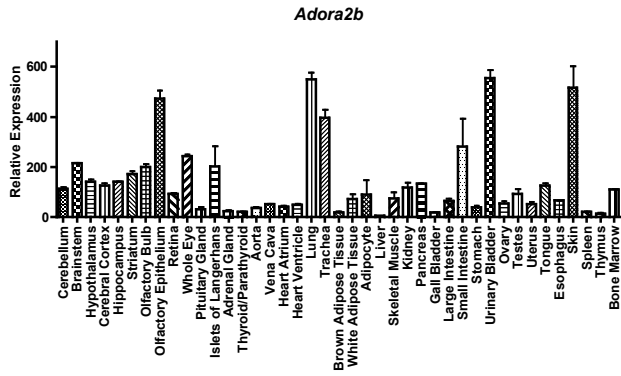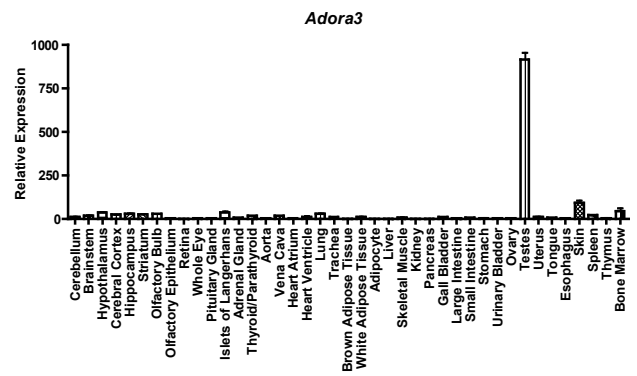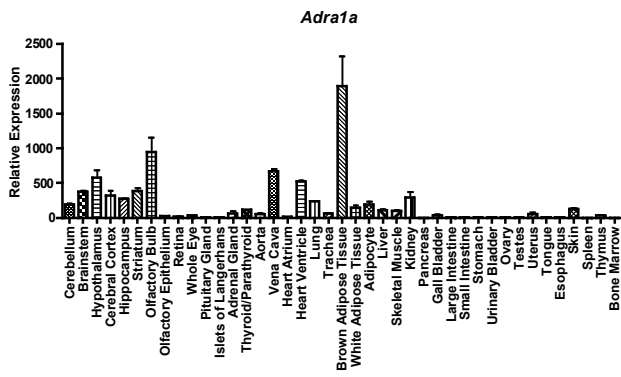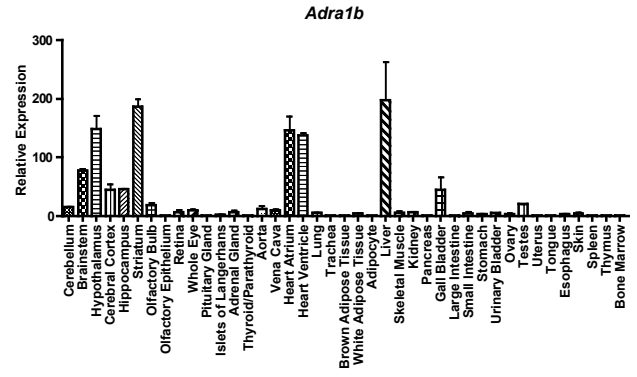

# Regard et al. Mouse GPCRs Page 2

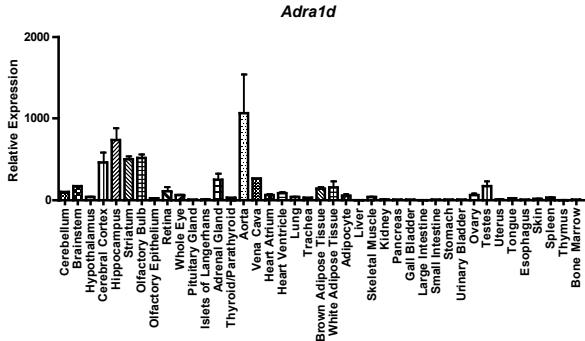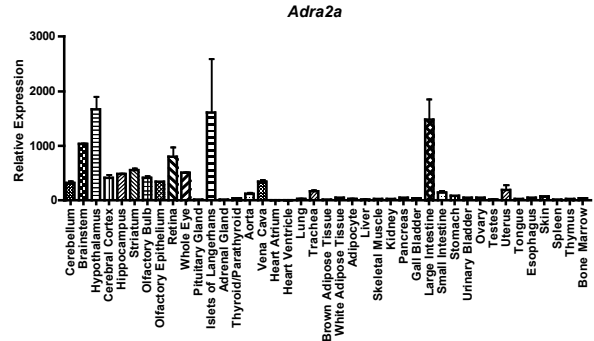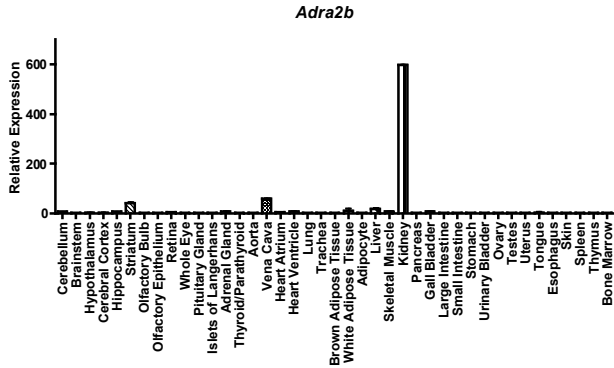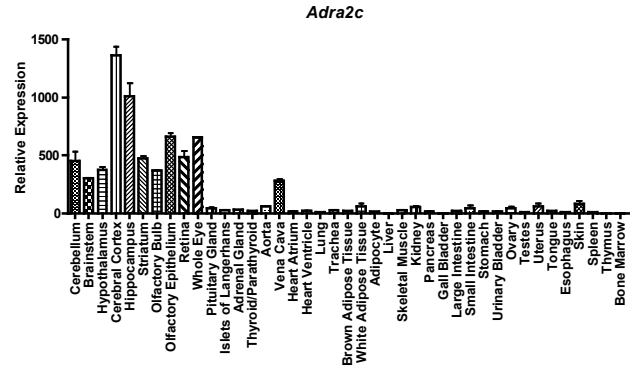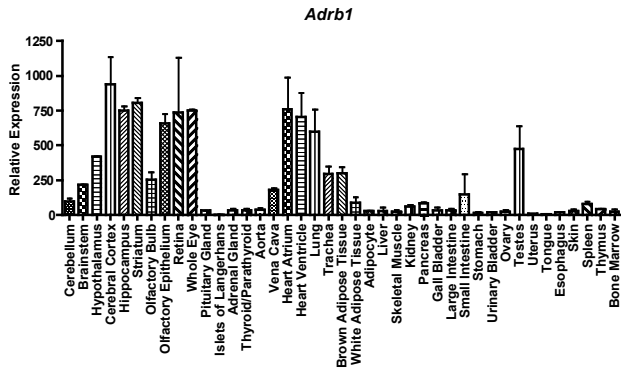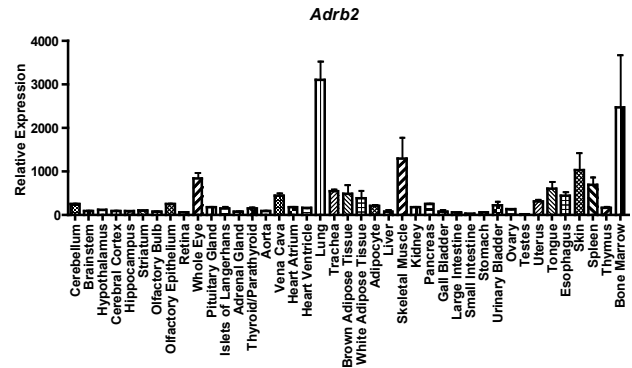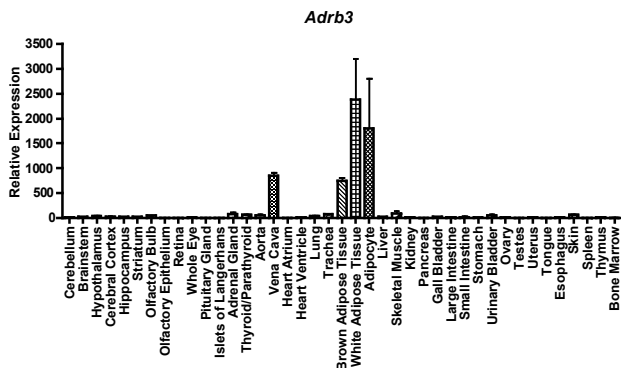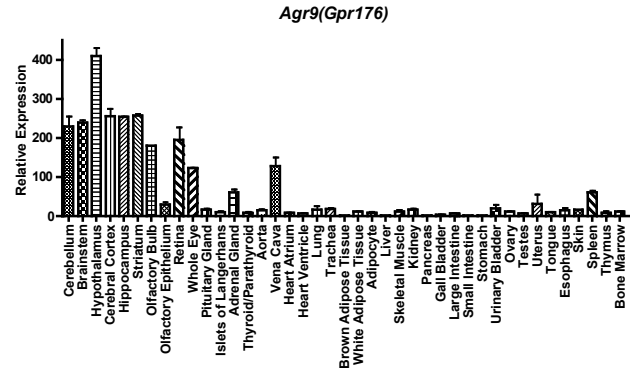

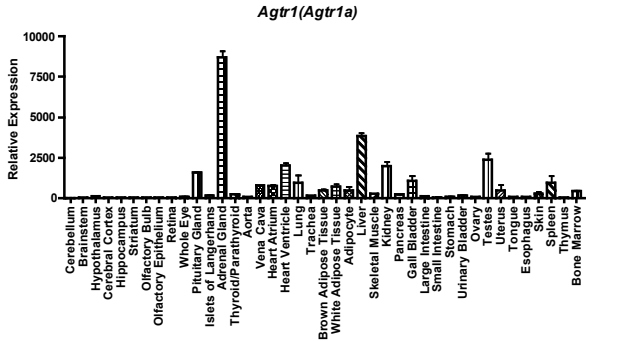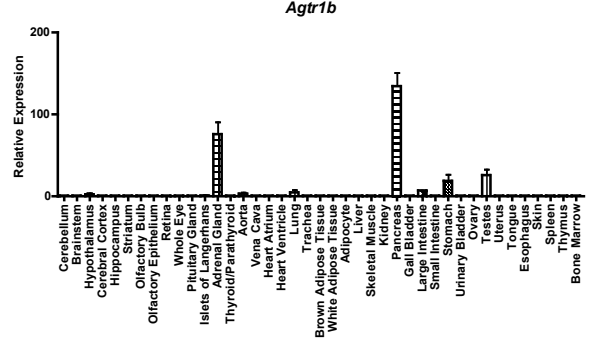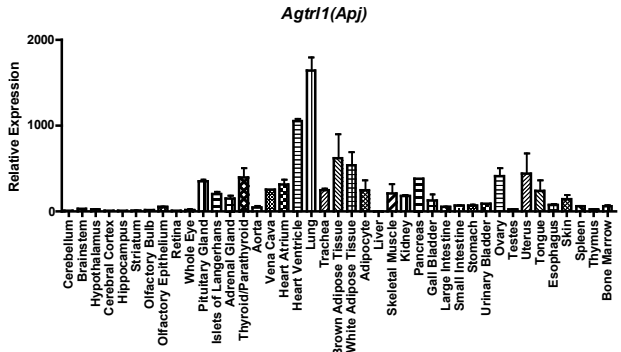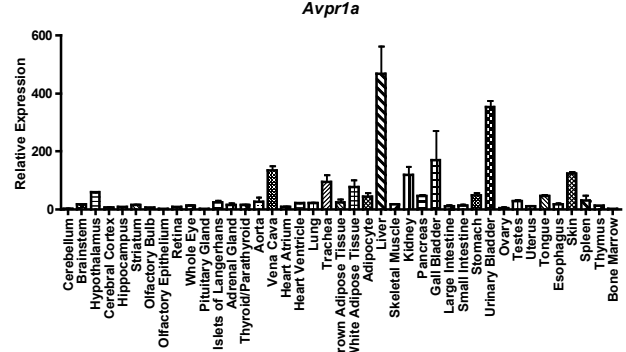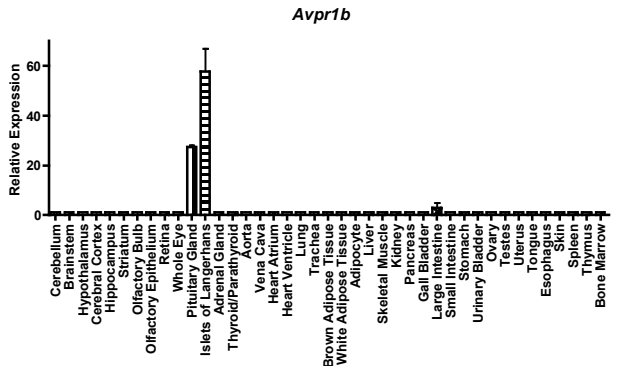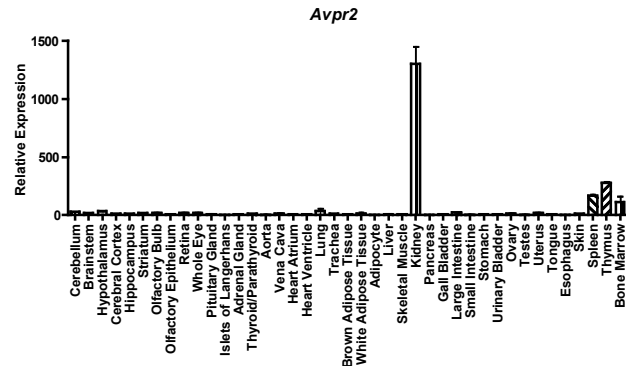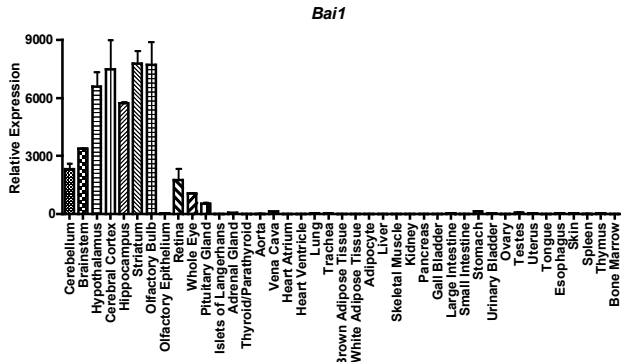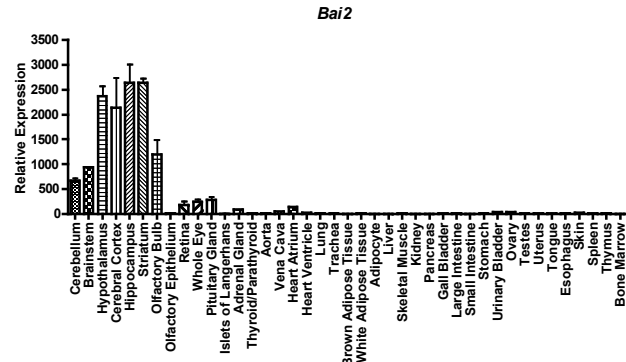

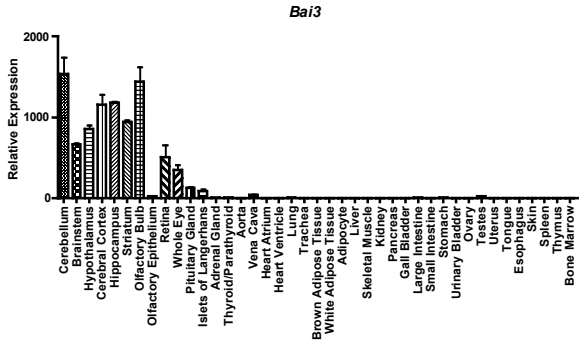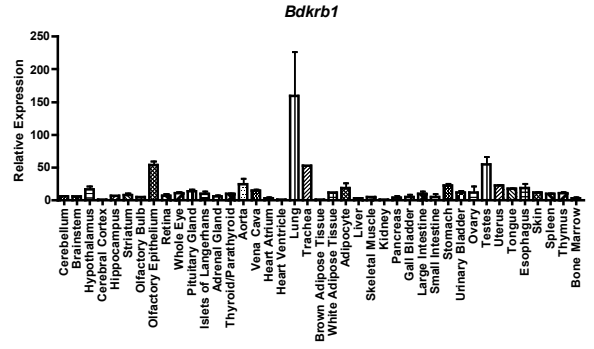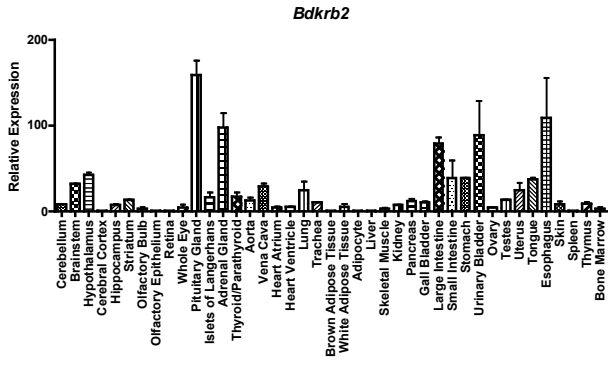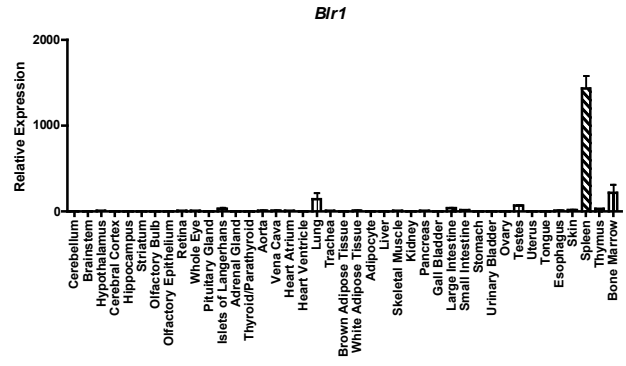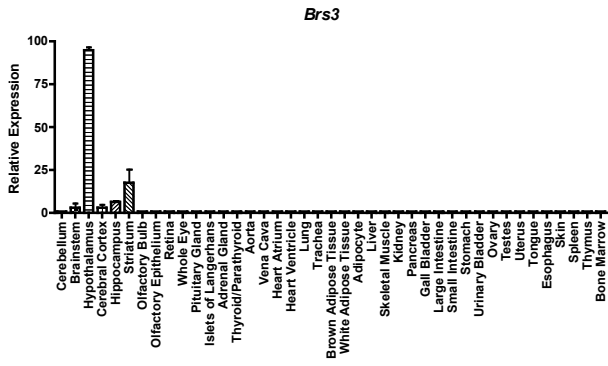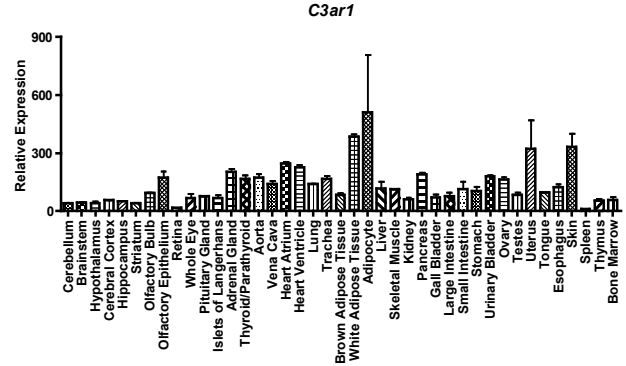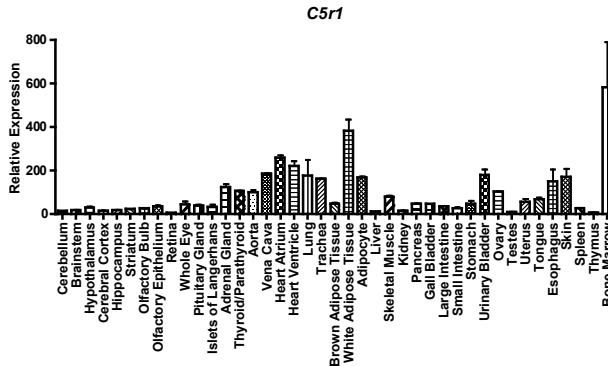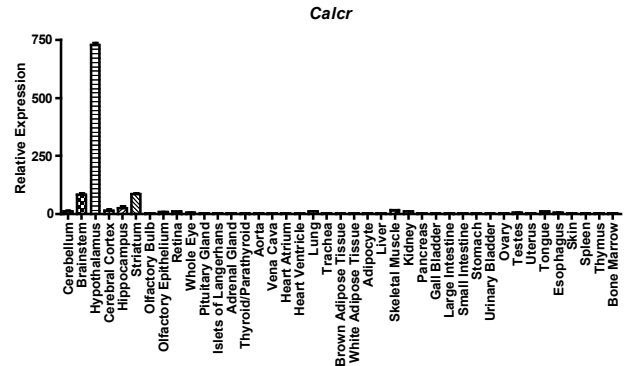

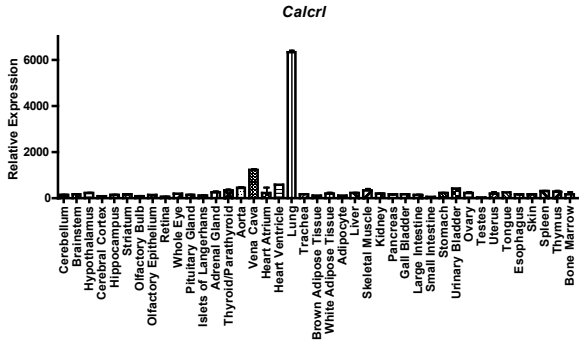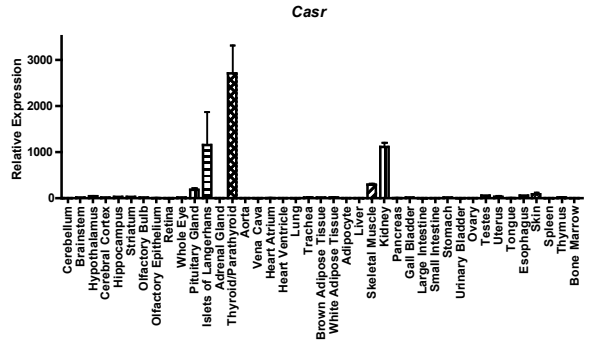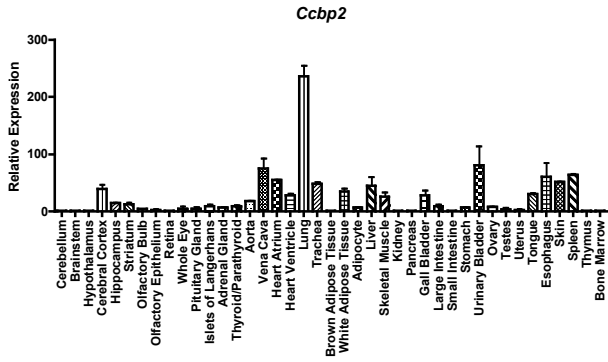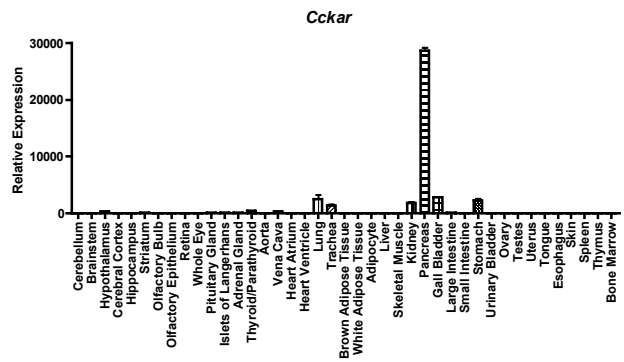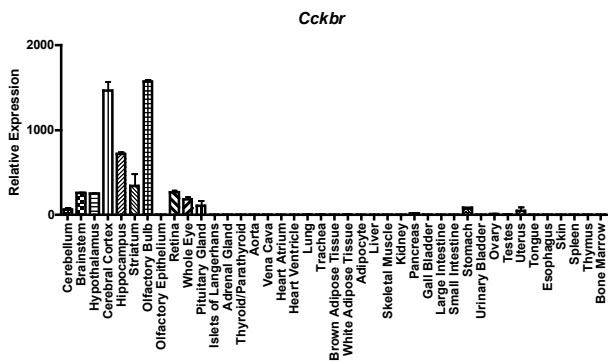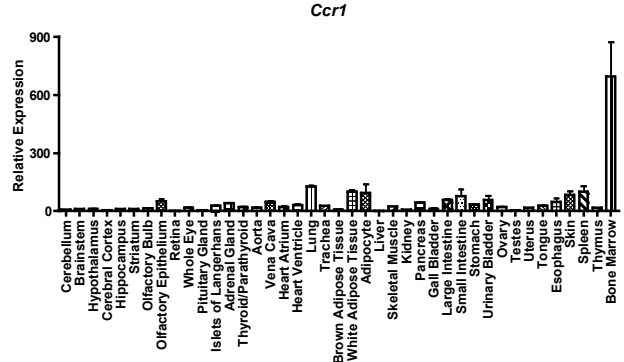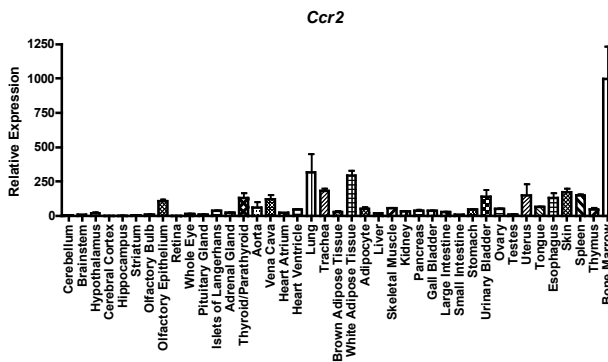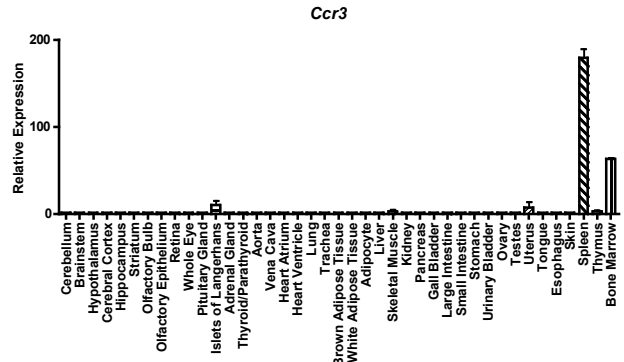

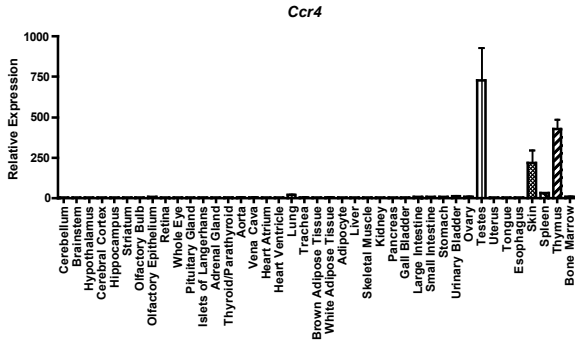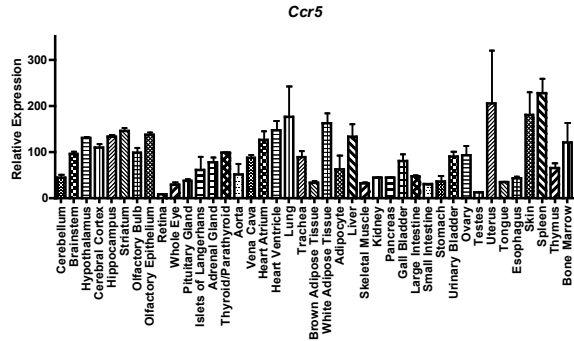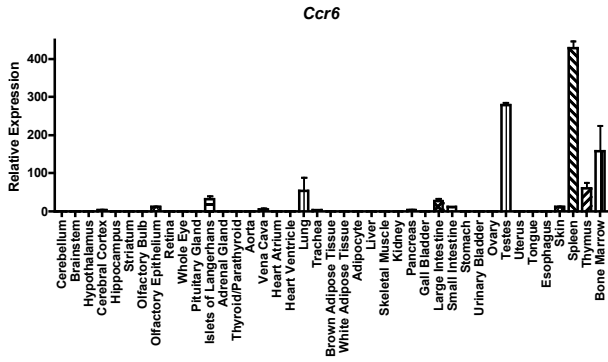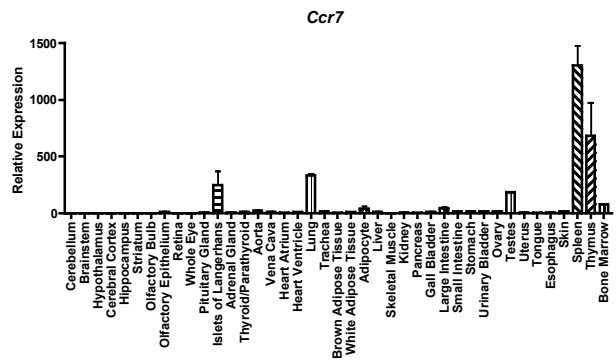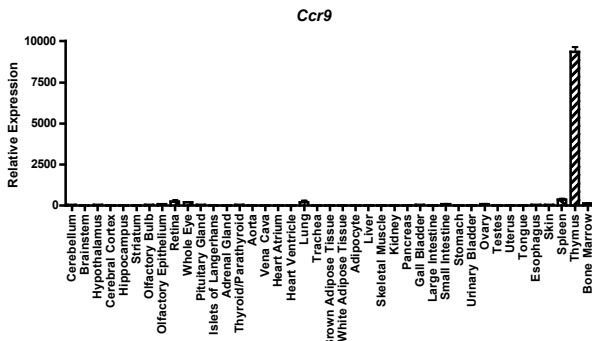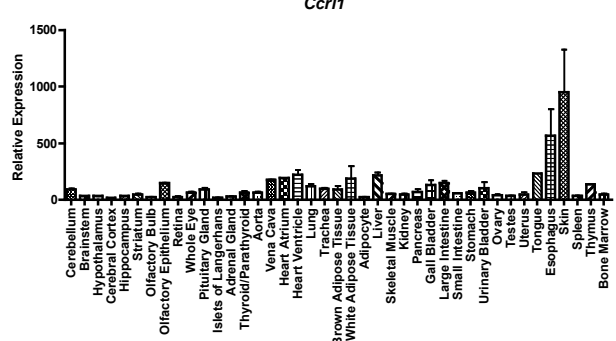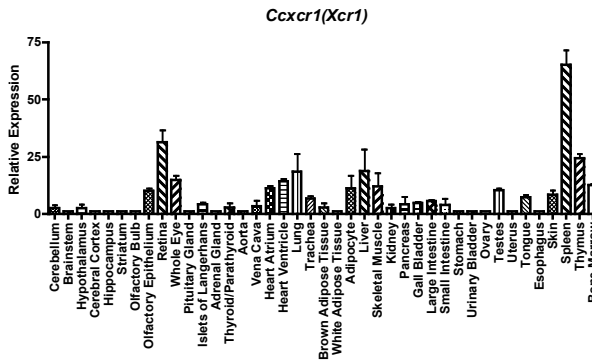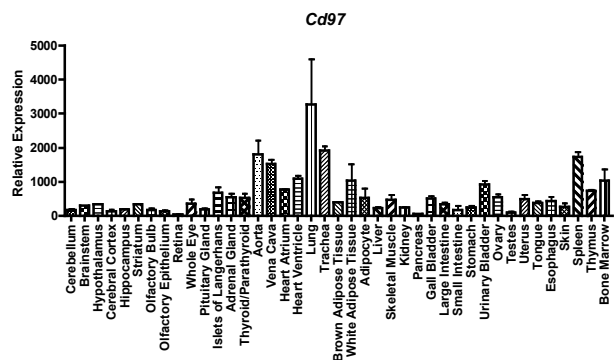

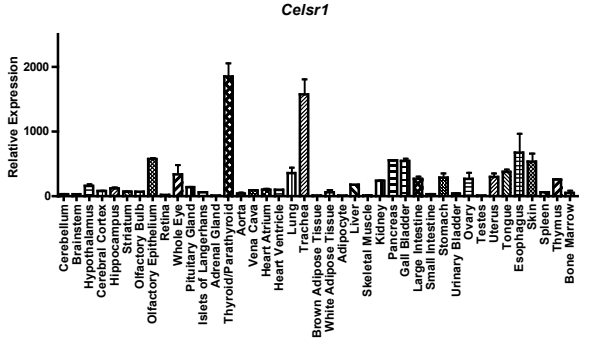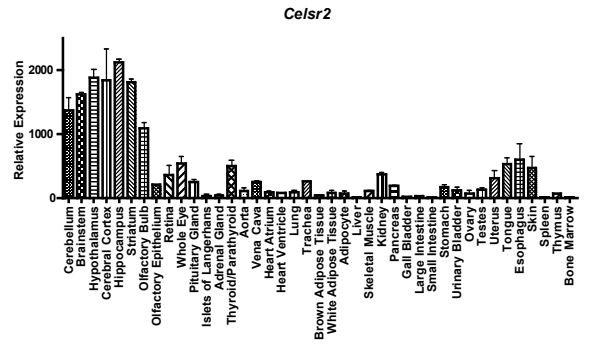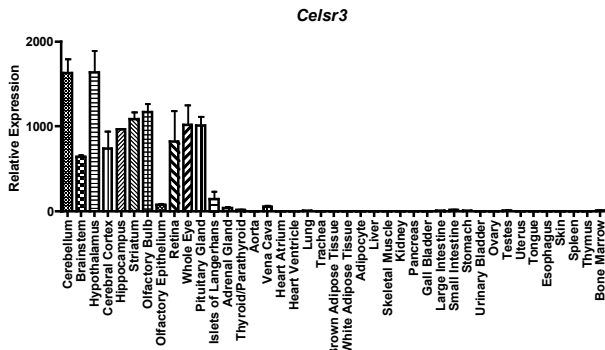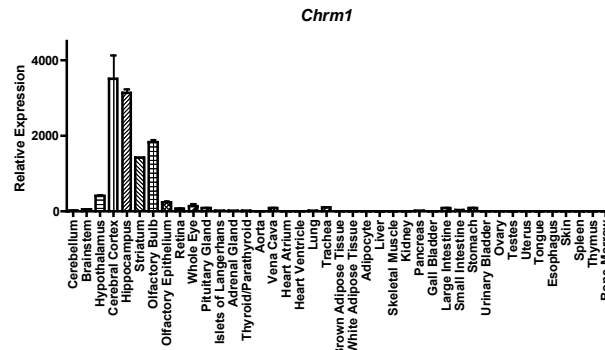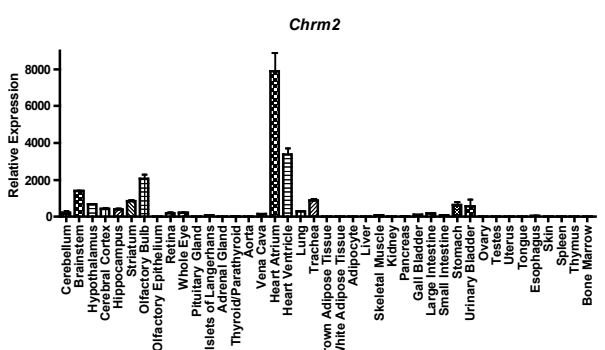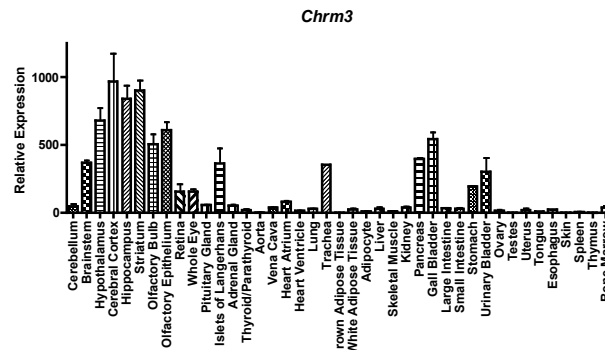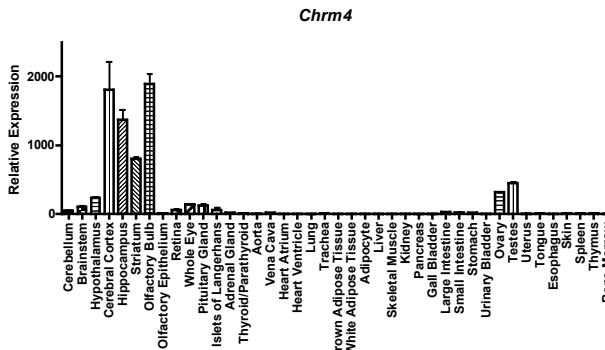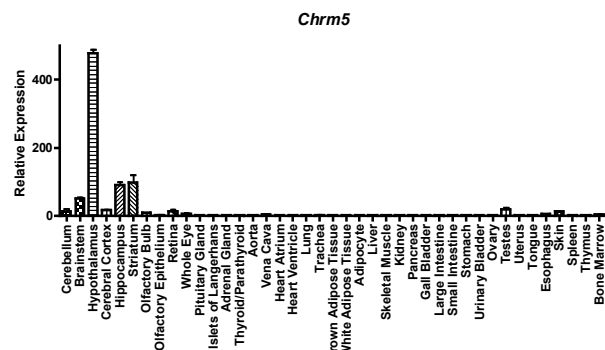

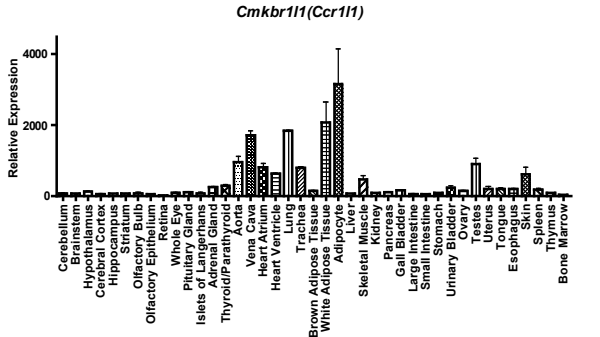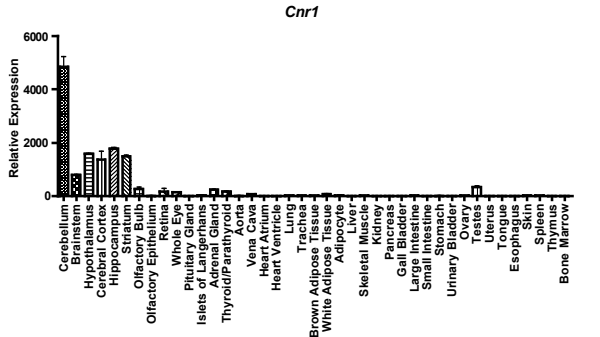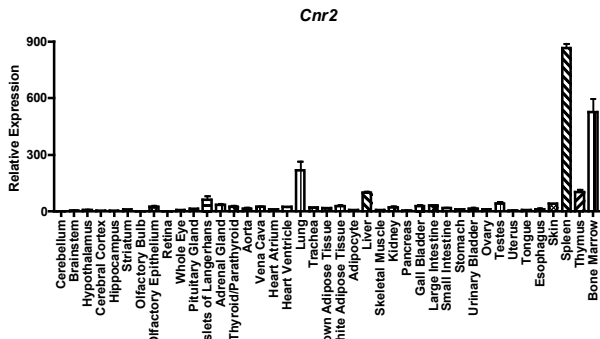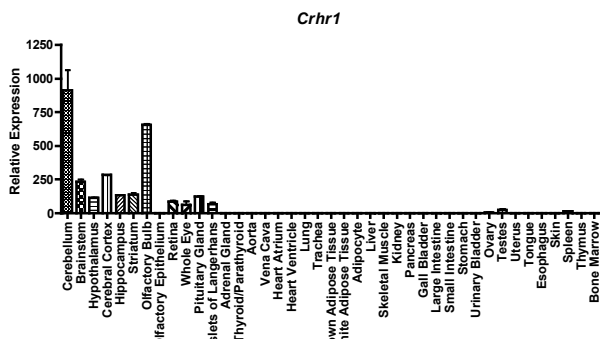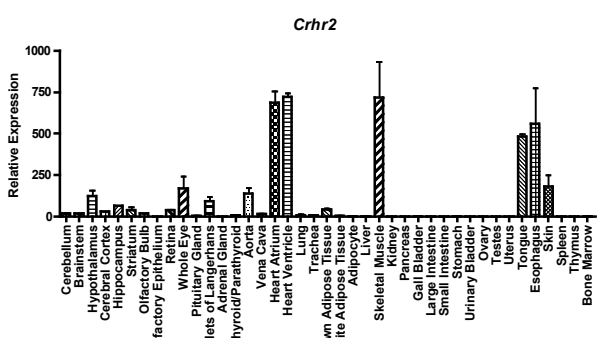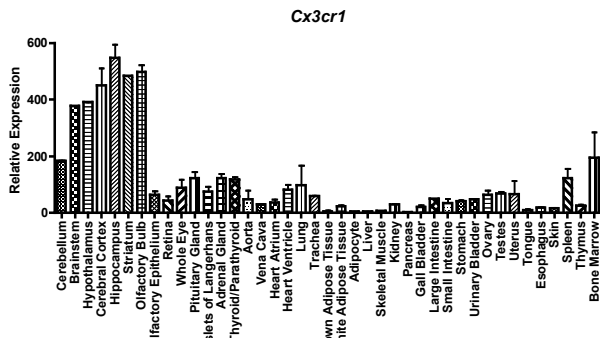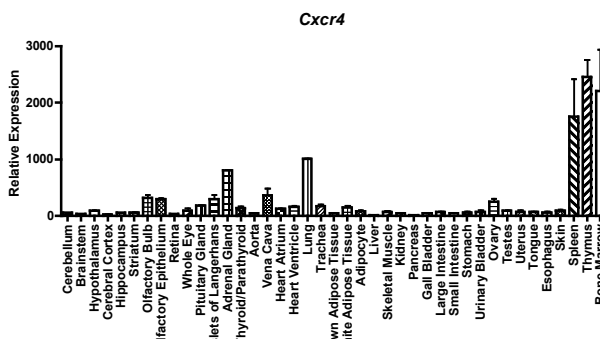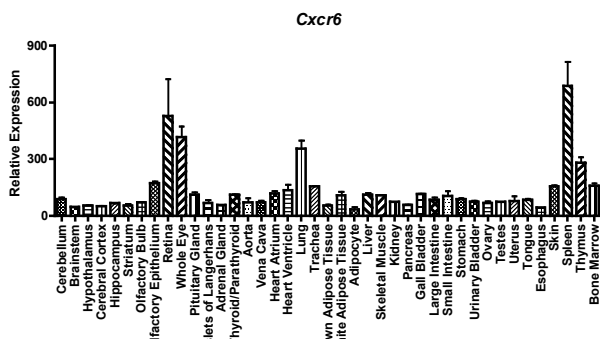



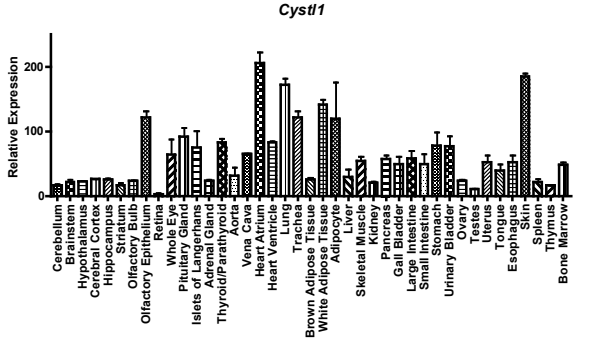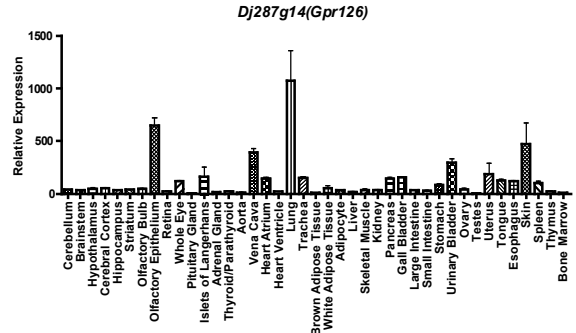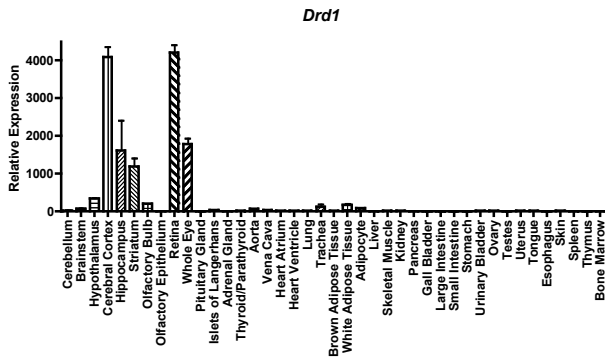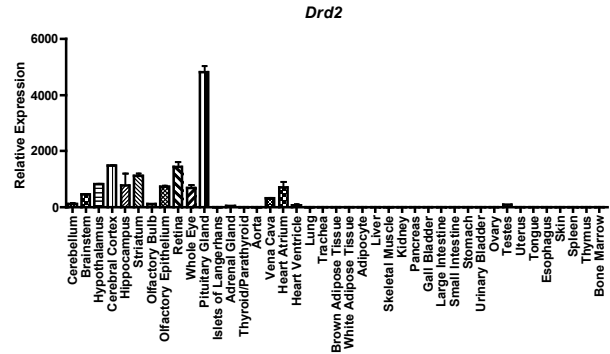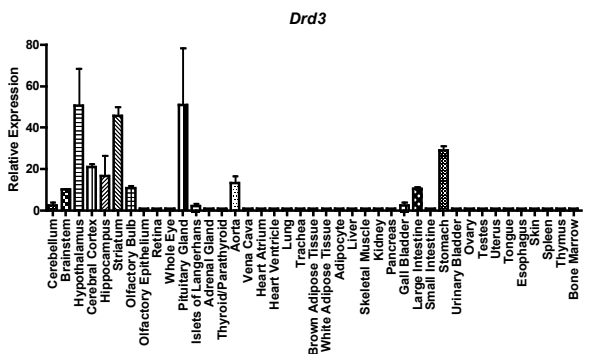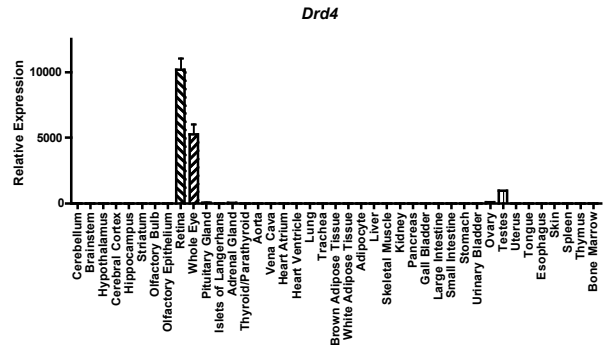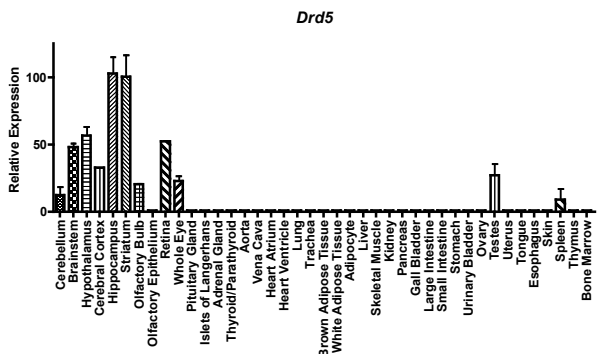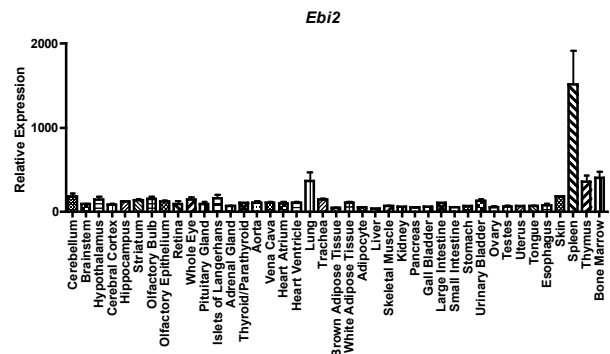

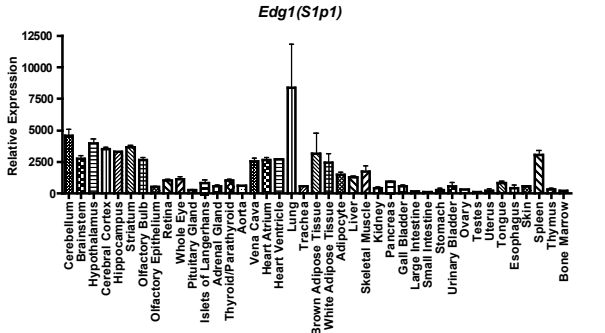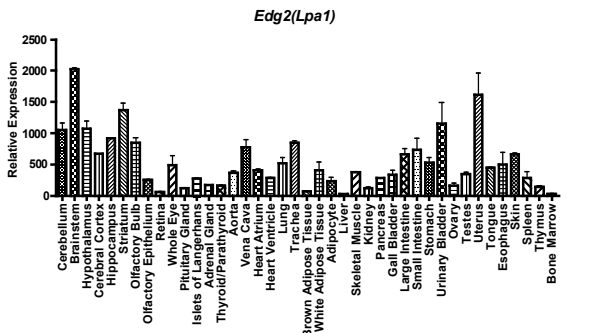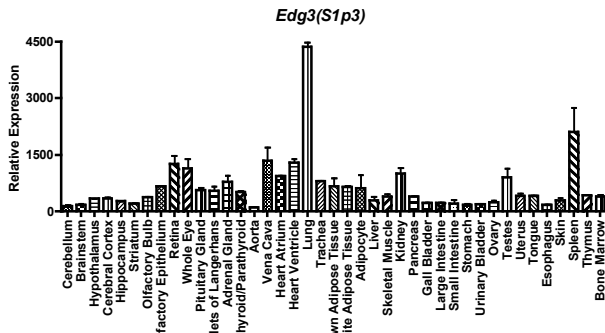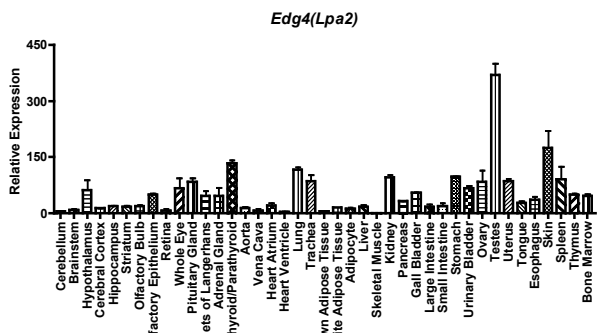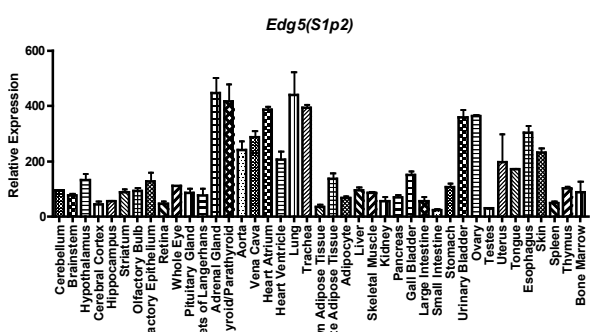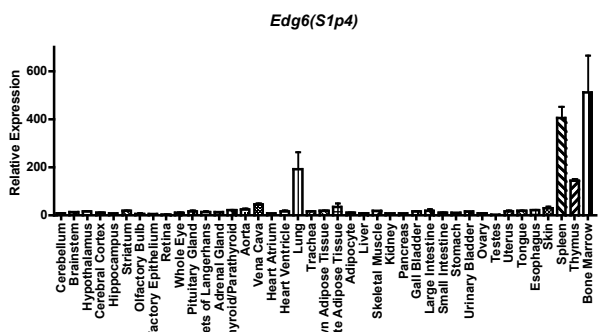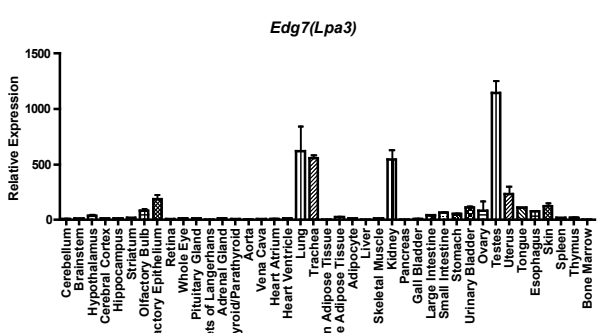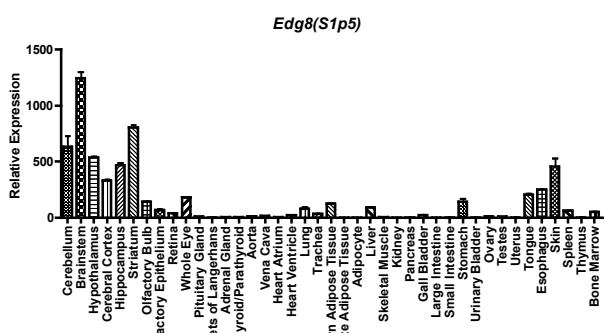

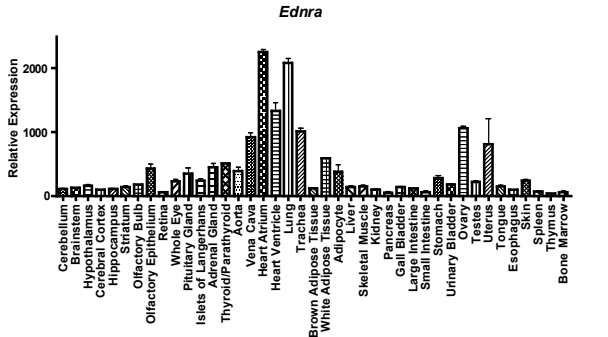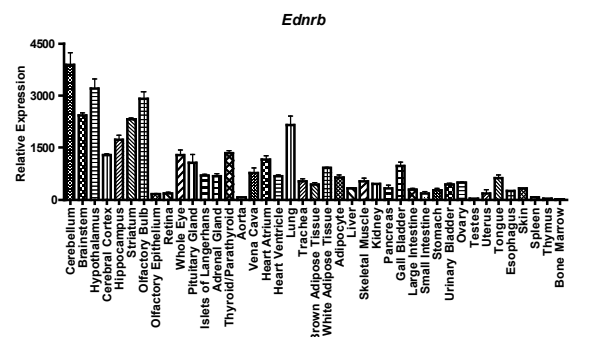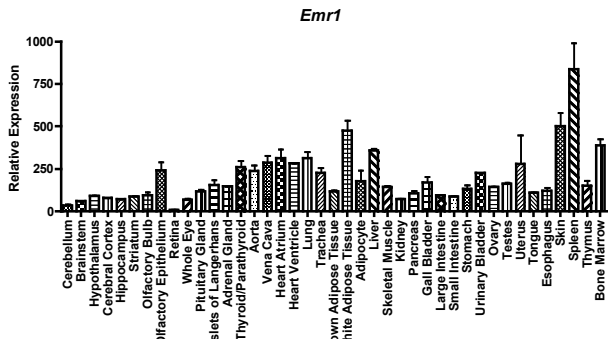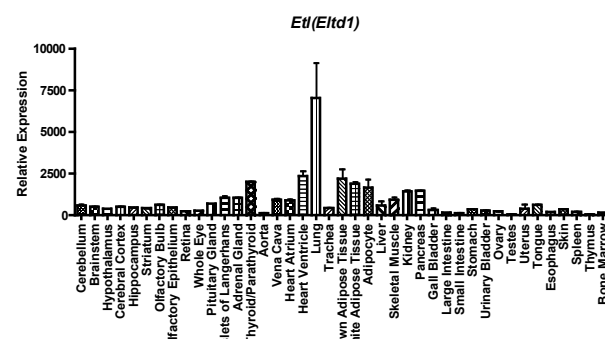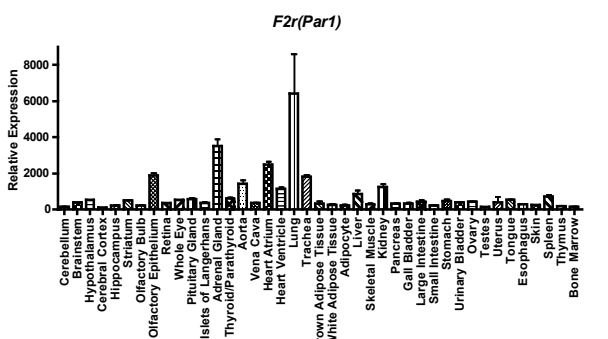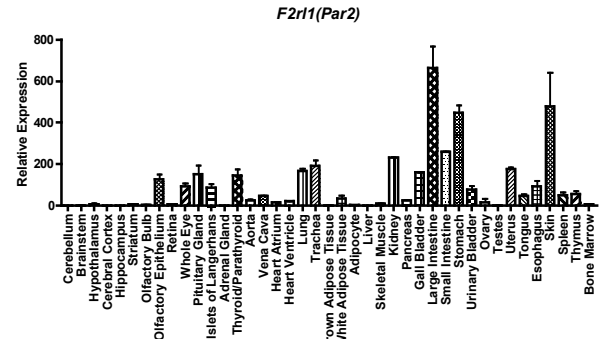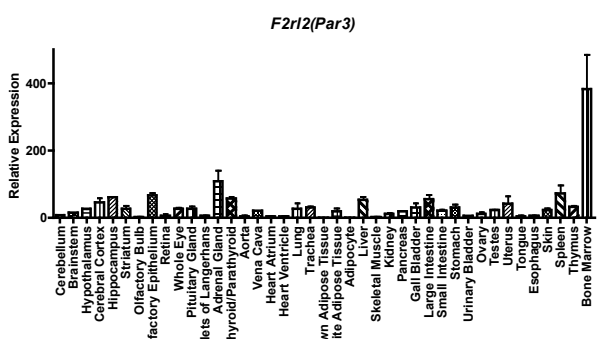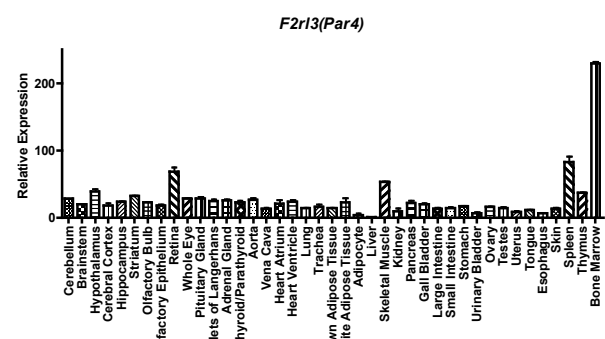

# Regard et al. Mouse GPCRs Page 12

**Fksg79(Gpr174)**

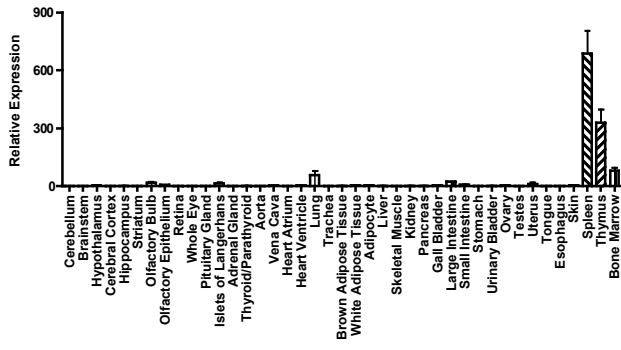

**Fji14454(Gpr128)**

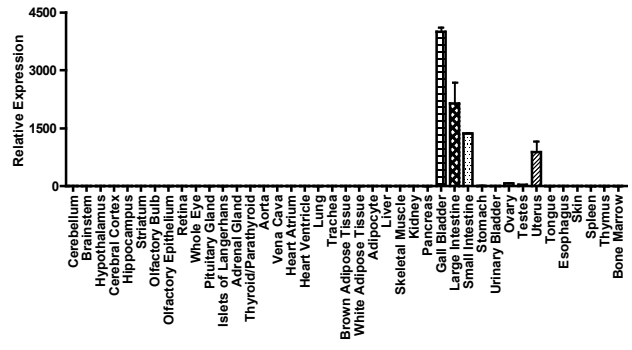

**Fpr1**

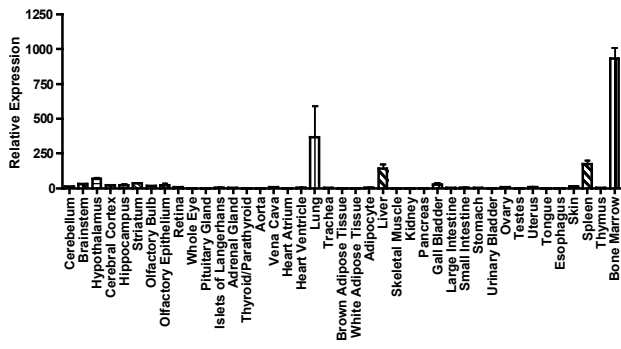

**Fpr-rs2**

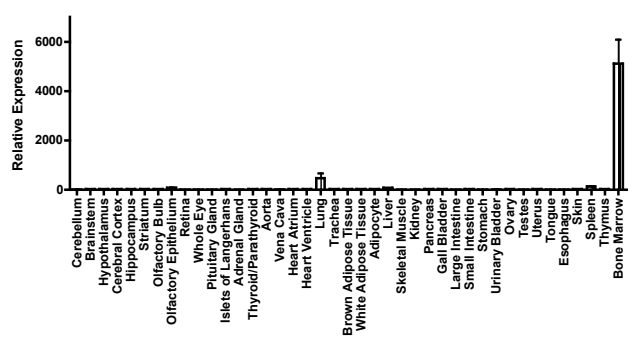

**Fshr**

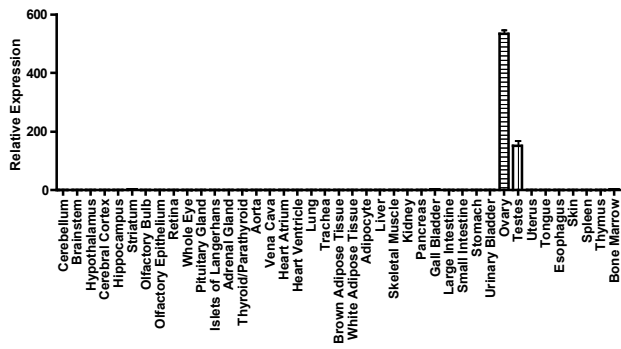

**Fy(Darc)**

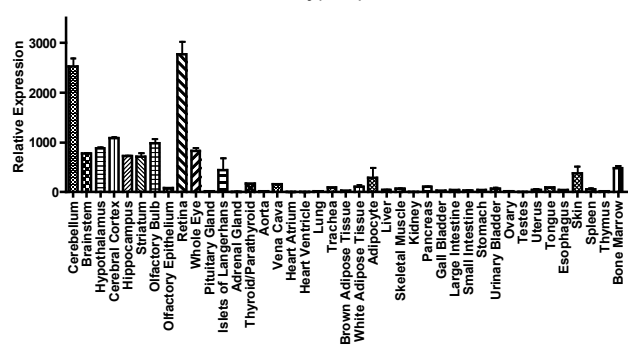

**Fzd1**

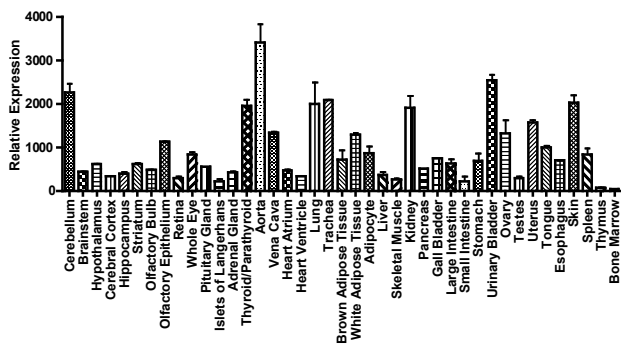

**Fzd10**

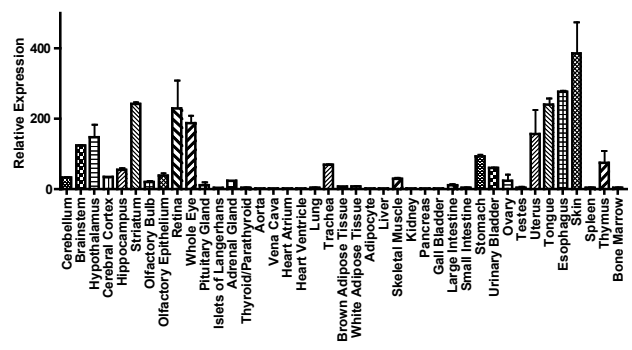

# Regard et al. Mouse GPCRs Page 13

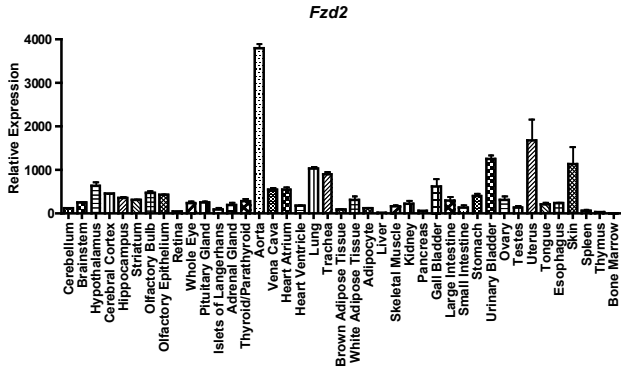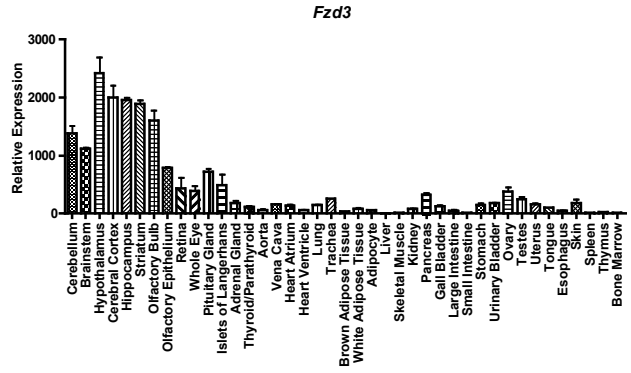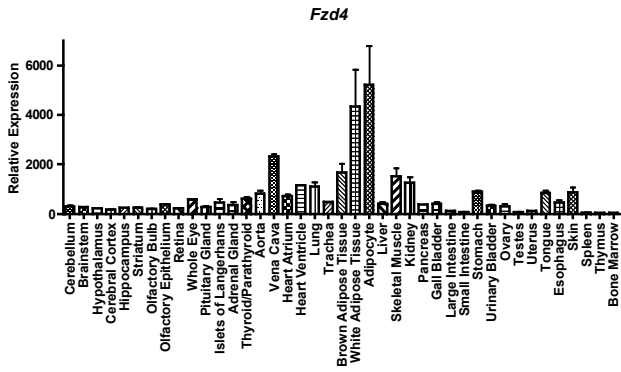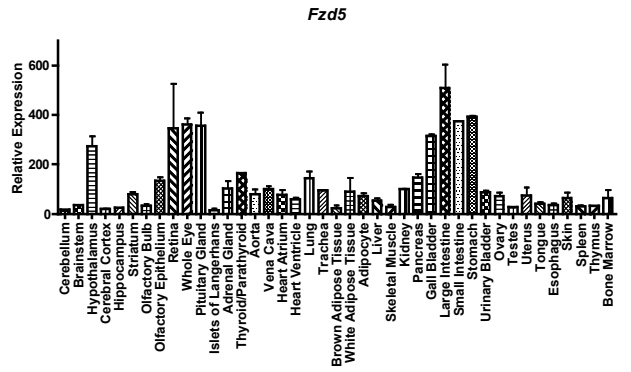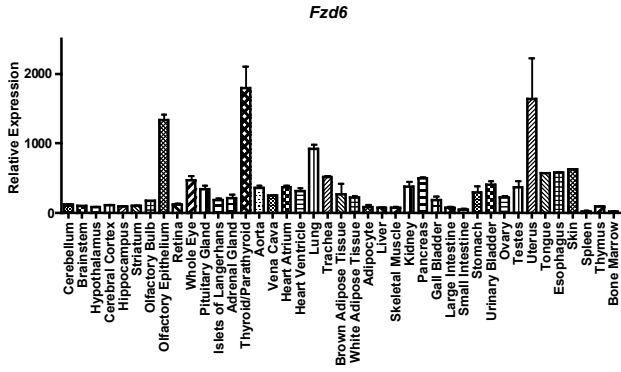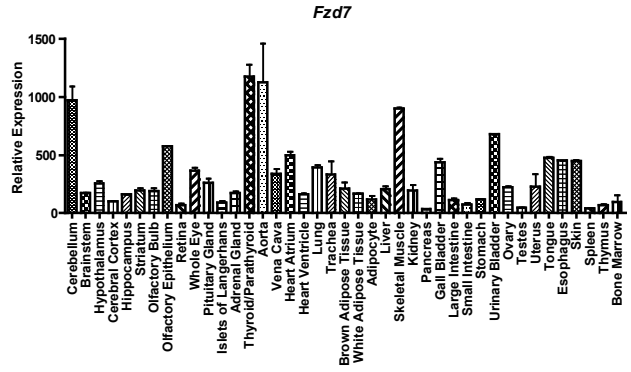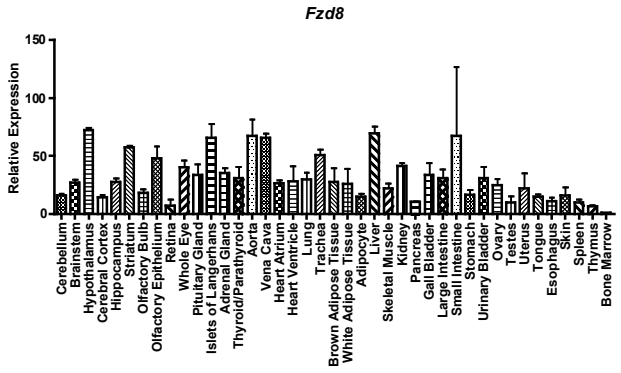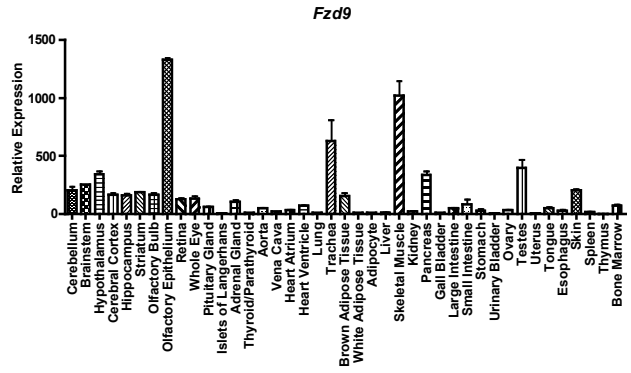

# Regard et al. Mouse GPCRs Page 14

**G2a(Gpr132)**

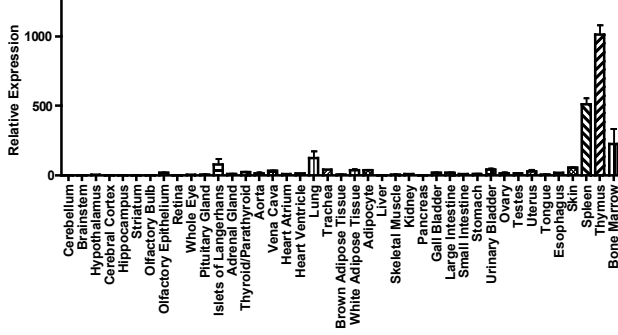

**Gabbr1**

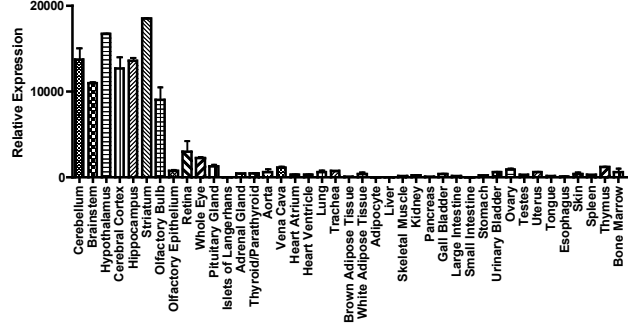

**Galr1**

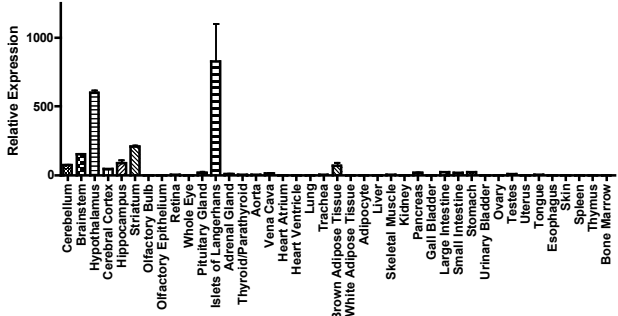

**Galr2**

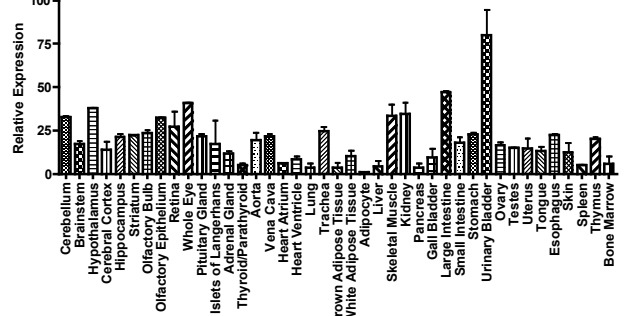

**Galr3**

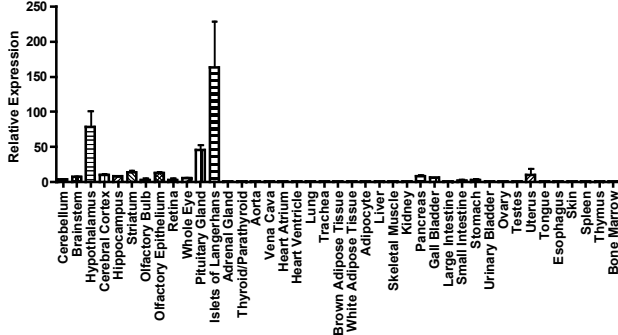

**Gcgr**

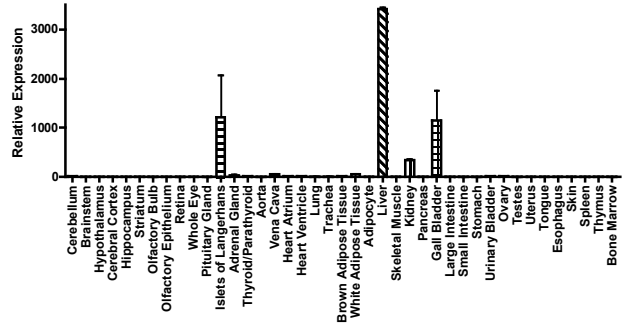

**Ghrhr**

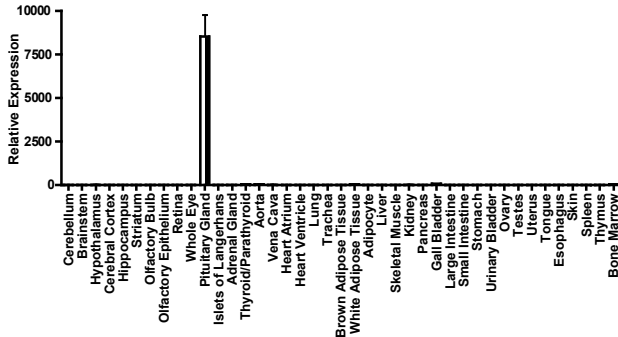

**Ghsr**

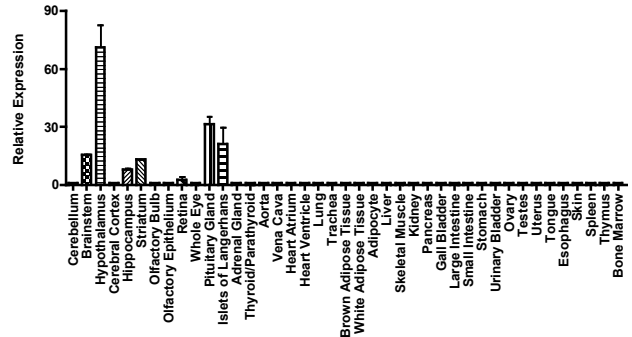

# Regard et al. Mouse GPCRs Page 15

**Gipr**

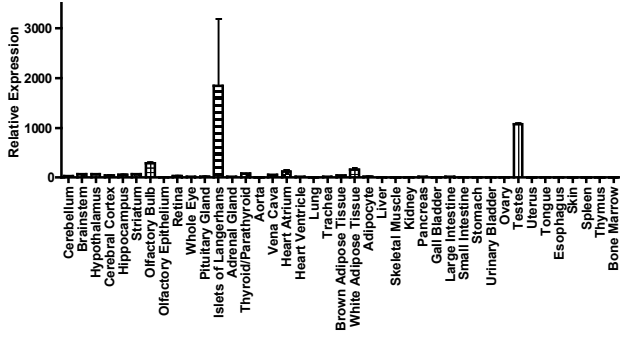

**Gip1r**

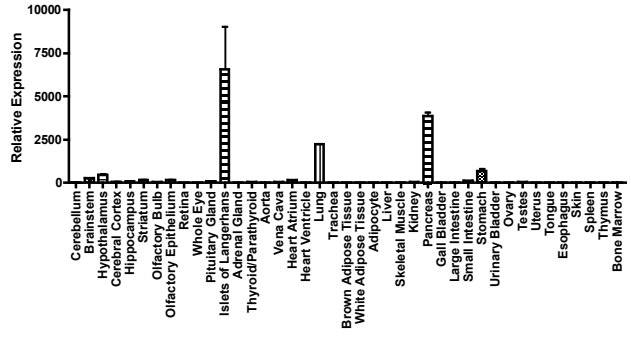

**Gip2r**

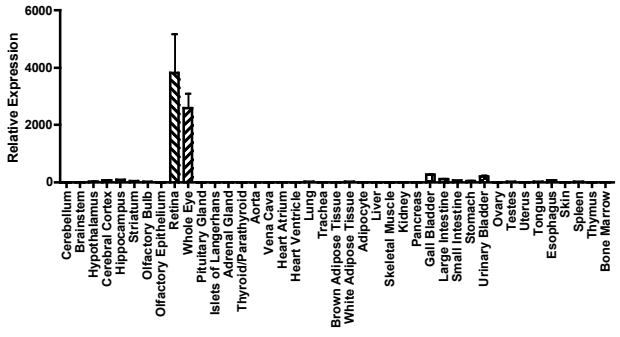

**Gnrhr**

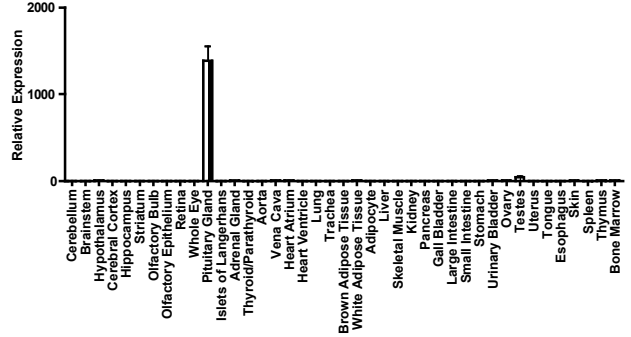

**Gpcr150**

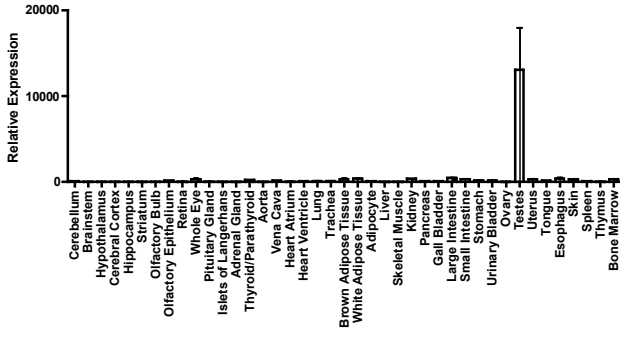

**Gpr1**

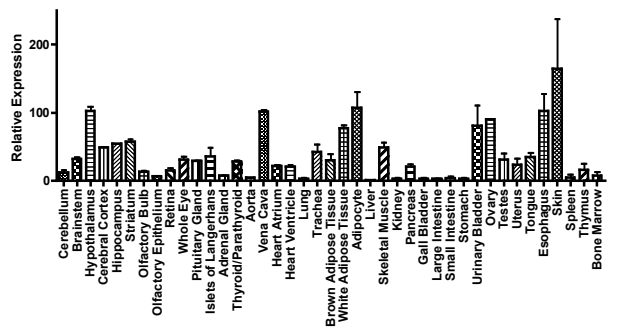

**Gpr10(Prhr)**

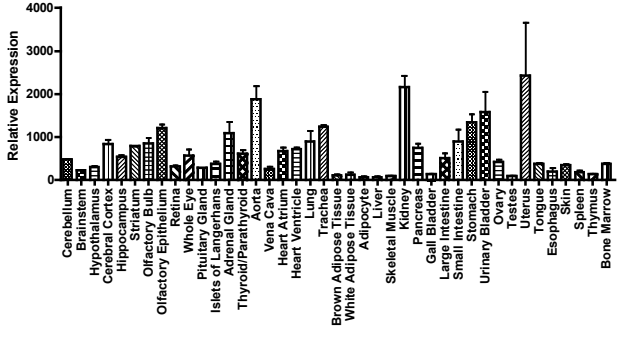

**Gpr101**

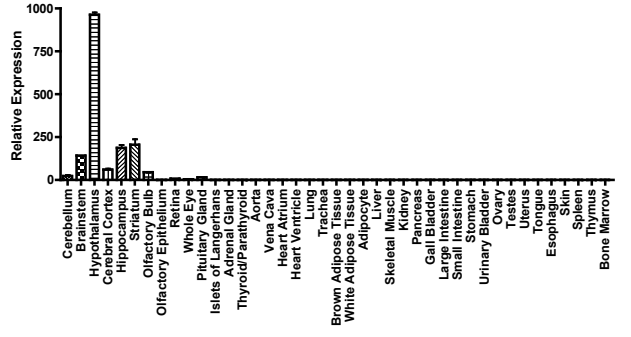

# Regard et al. Mouse GPCRs Page 16

**Gpr103**

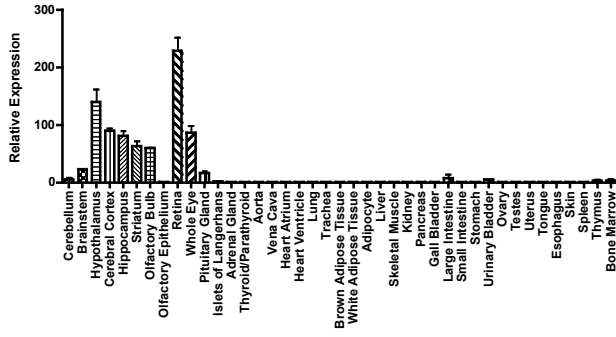

**Gpr105(P2ry14)**

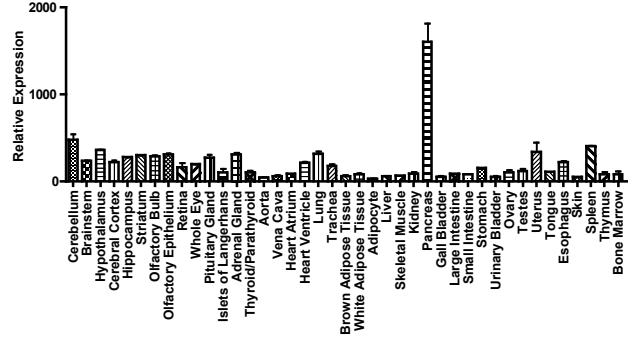

**Gpr107**

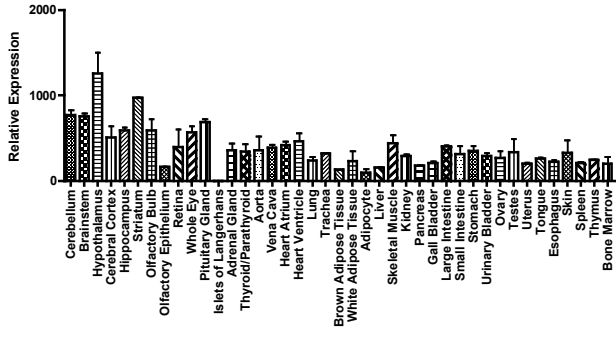

**Gpr108**

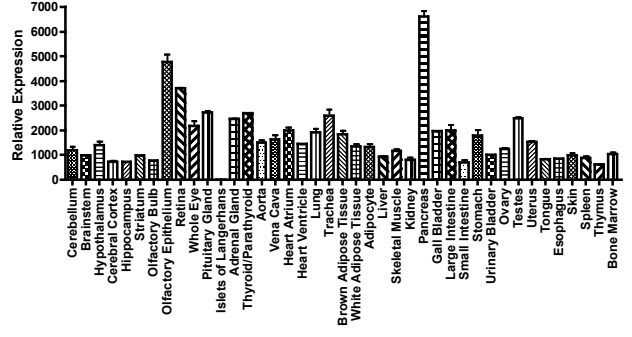

**Gpr12**

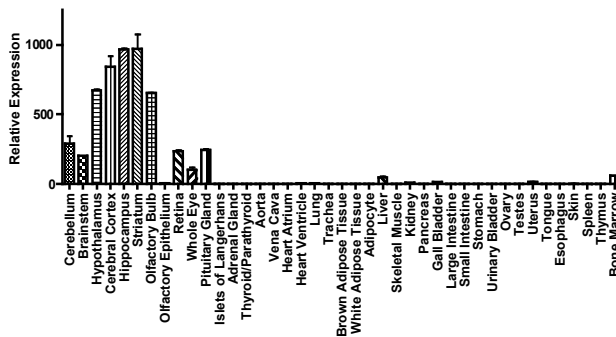

**Gpr14(Uts2r)**

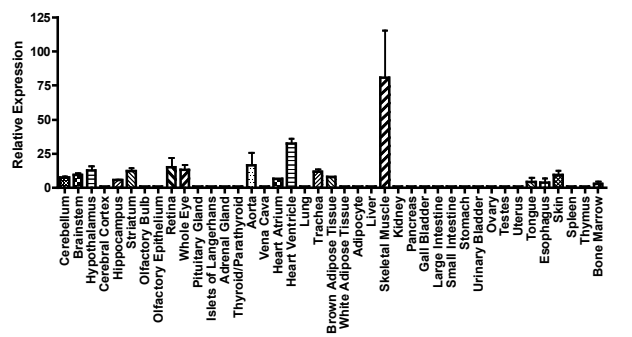

**Gpr15**

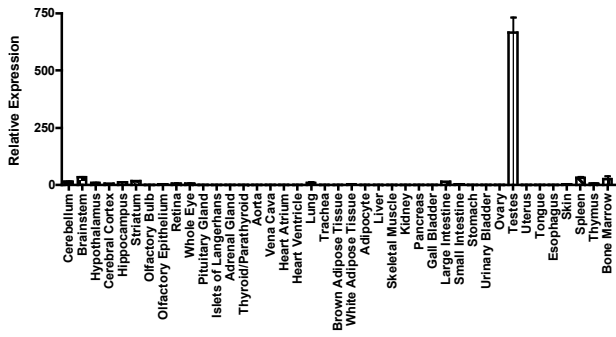

**Gpr17**

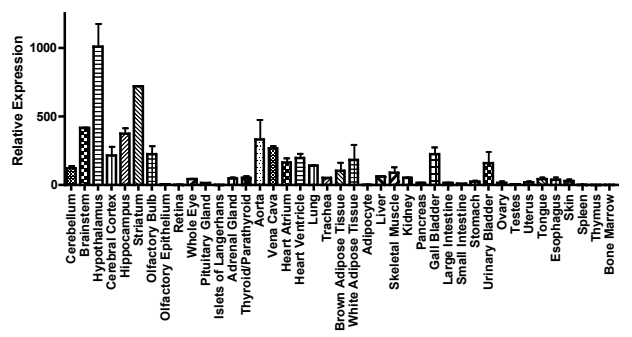



# Regard et al. Mouse GPCRs Page 17

*Gpr18*

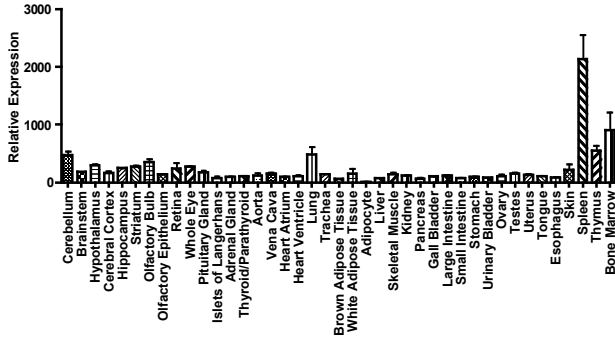

*Gpr19*

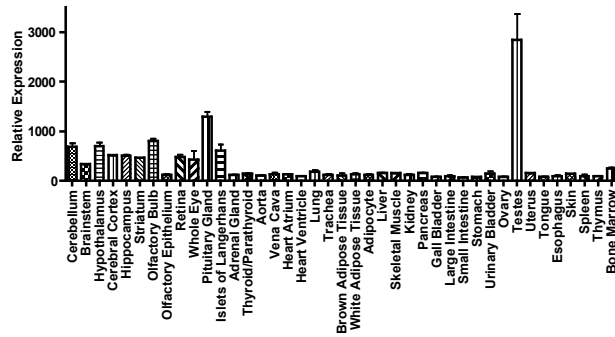

*Gpr2(Ccr10)*

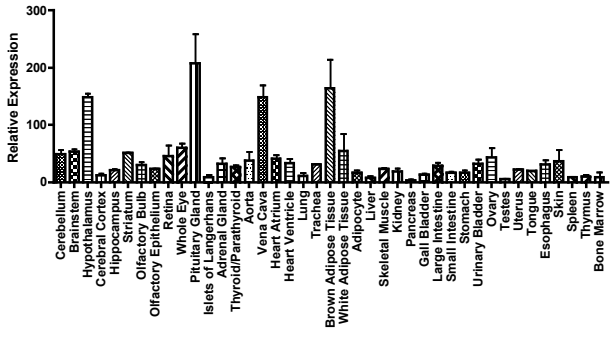

*Gpr20*

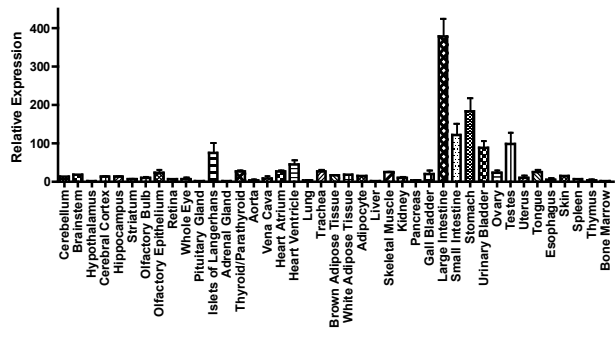

*Gpr21*

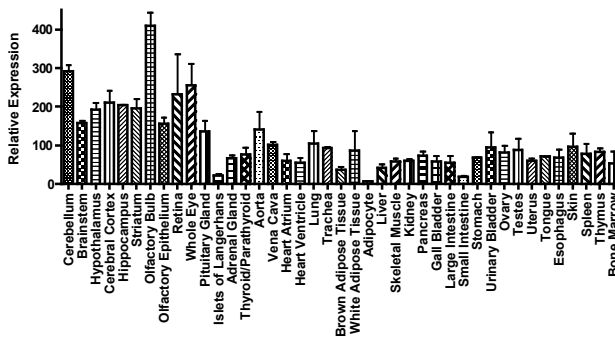

*Gpr22*

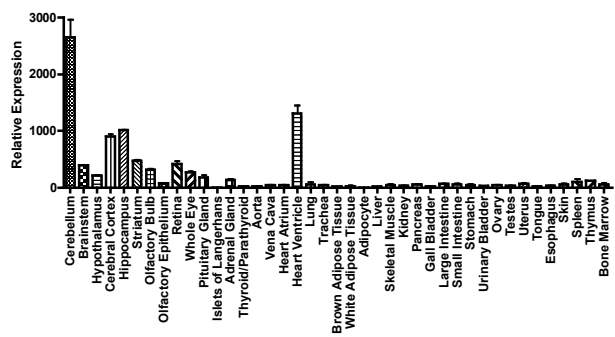

*Gpr23(Lpa4)*

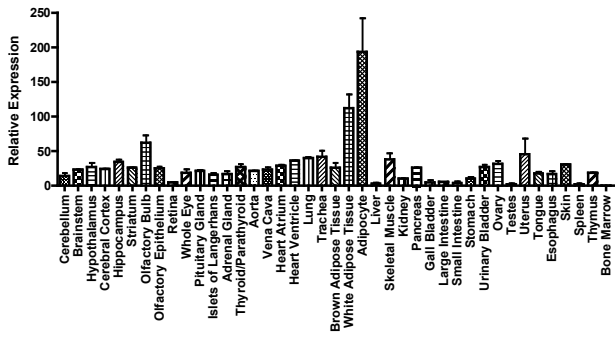

*Gpr24(Mchr1)*

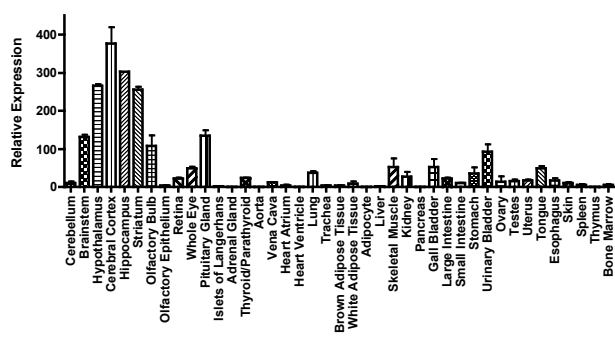

# Regard et al. Mouse GPCRs Page 18

*Gpr26*

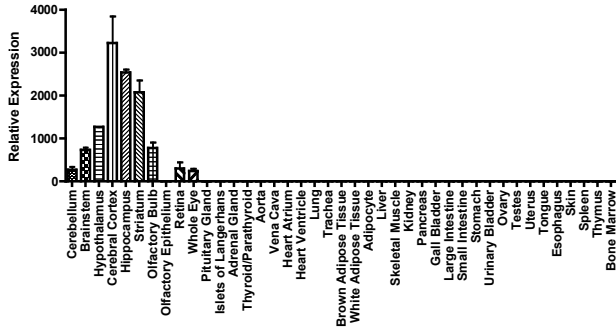

*Gpr26*

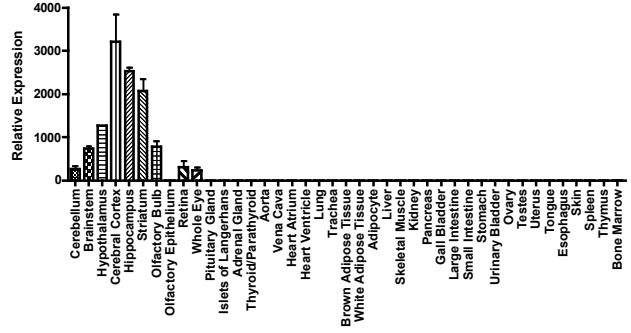

*Gpr27(Sreb1)*

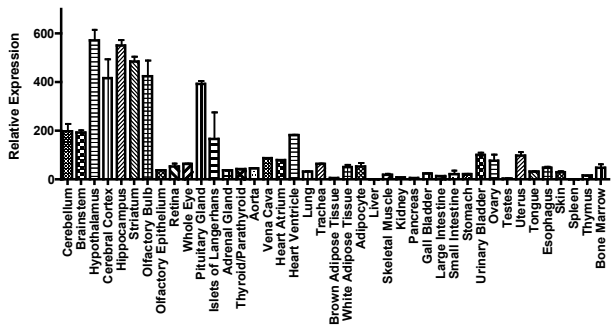

*Gpr3*

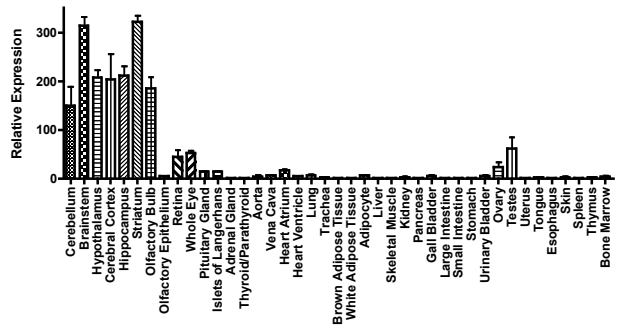

*Gpr30(Gper)*

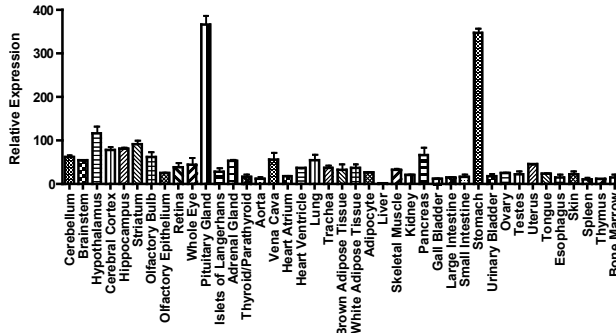

*Gpr31*

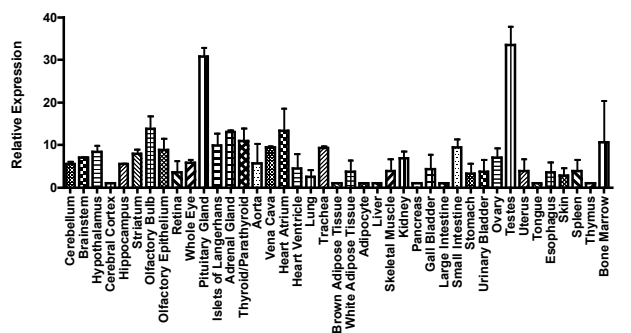

*Gpr33*

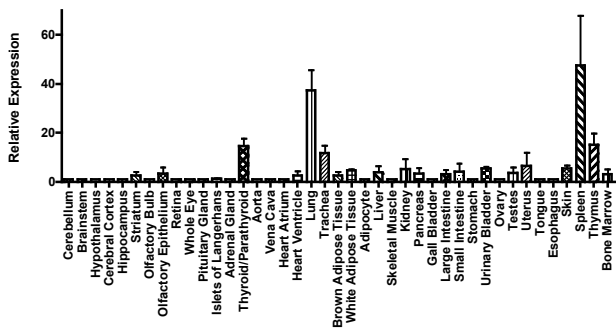

*Gpr34*

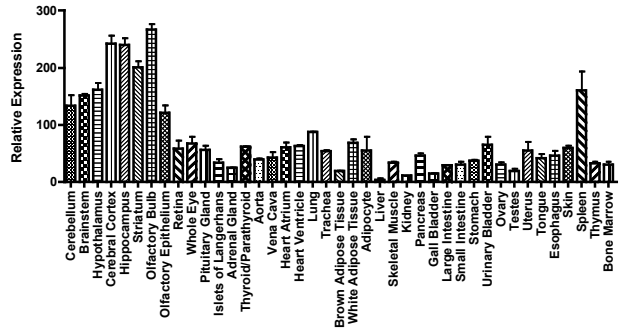

# Regard et al. Mouse GPCRs Page 19

*Gpr35*

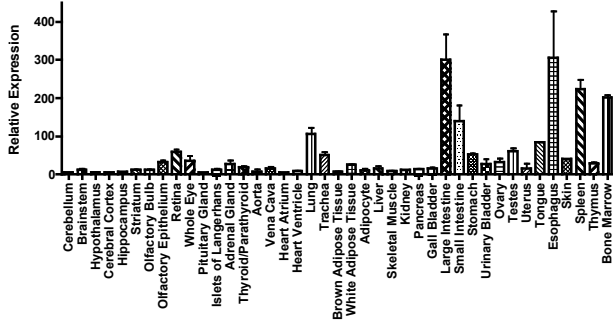

*Gpr37(Paelr)*

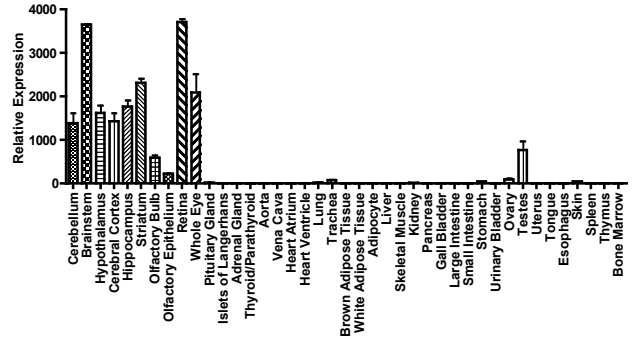

*Gpr3711*

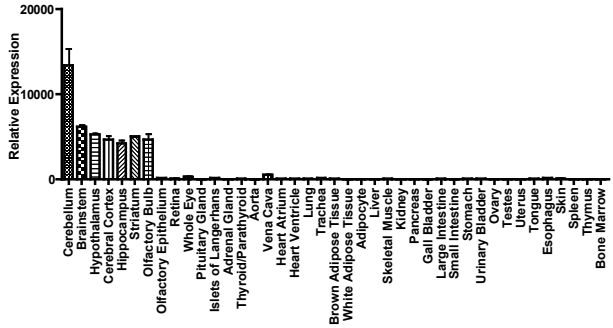

*Gpr39(Lypd1)*

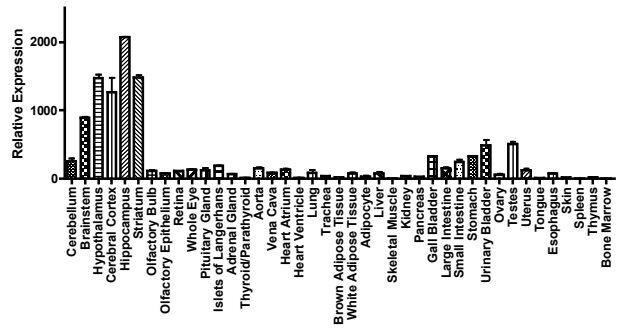

*Gpr4*

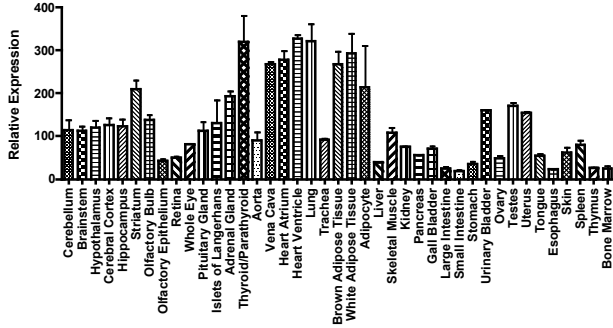

*Gpr40(Ffar1)*

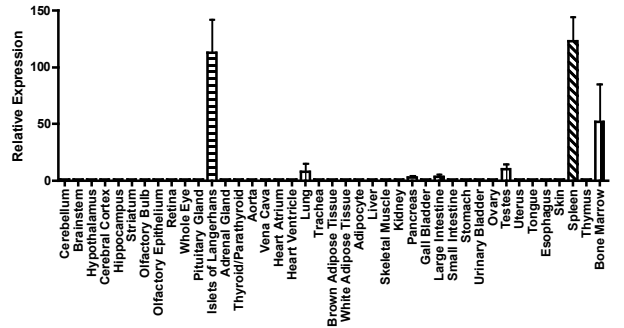

*Gpr41(Ffar3)*

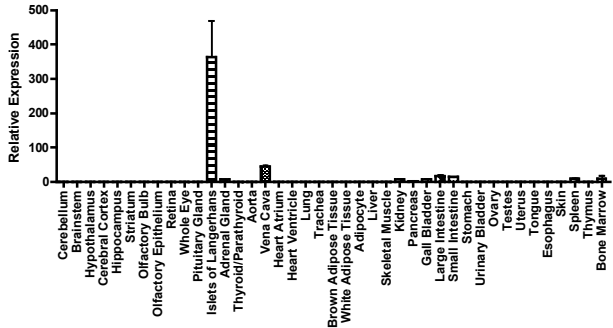

*Gpr43(Ffar2)*

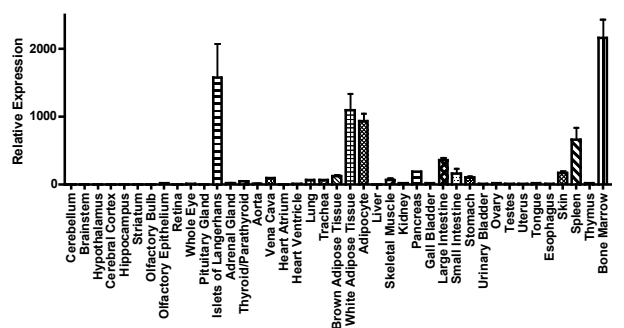

# Regard et al. Mouse GPCRs Page 20

*Gpr44*(Crth2)

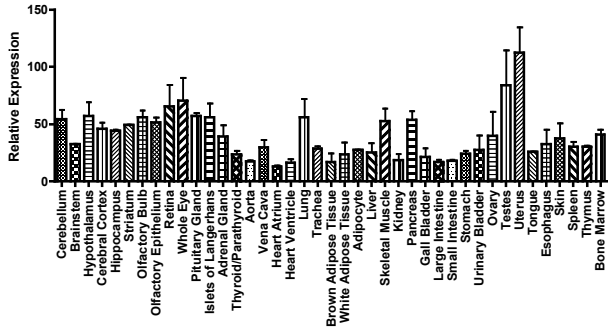

*Gpr45*

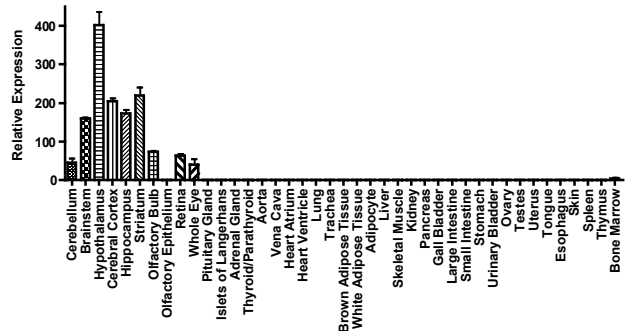

*Gpr48*(Lgr4)

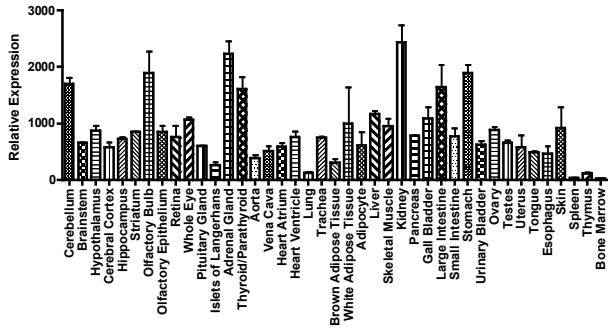

*Gpr49*(Lgr5)

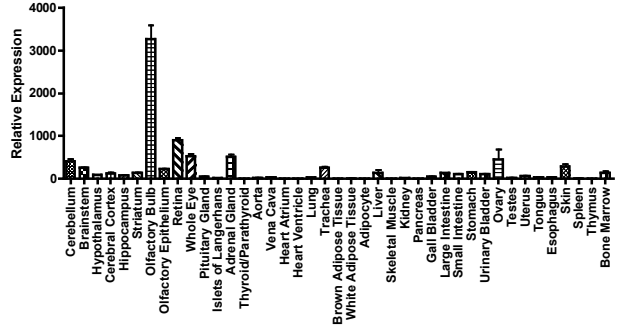

*Gpr50*

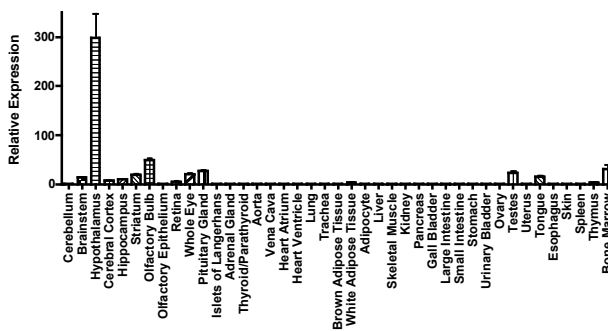

*Gpr51*(Gabbr2)

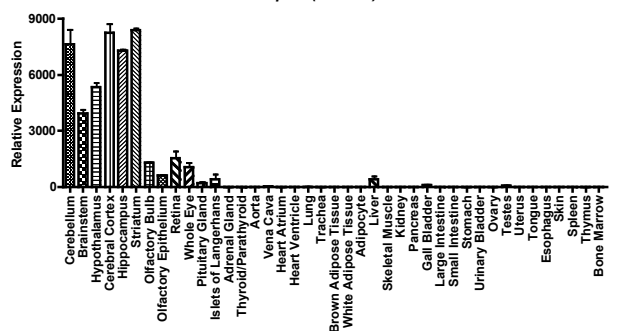

*Gpr54*(Kiss1r)

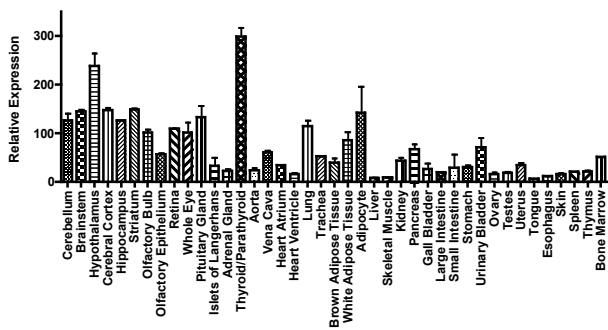

*Gpr55*

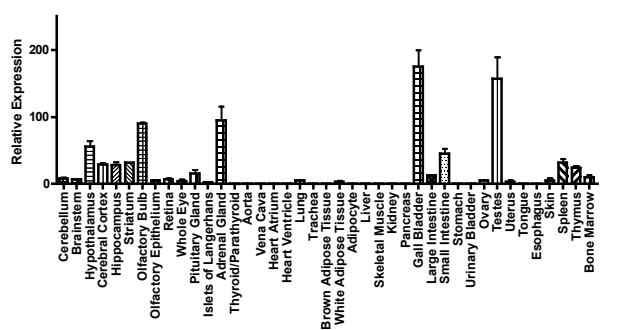

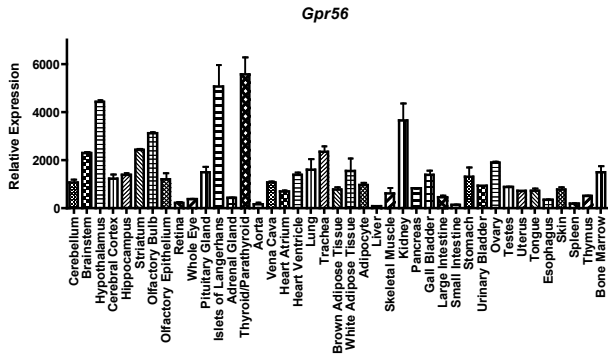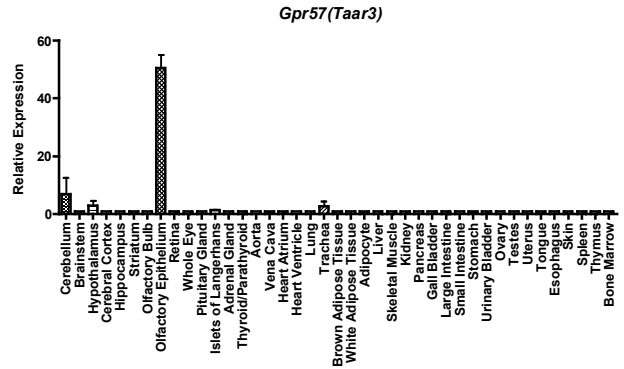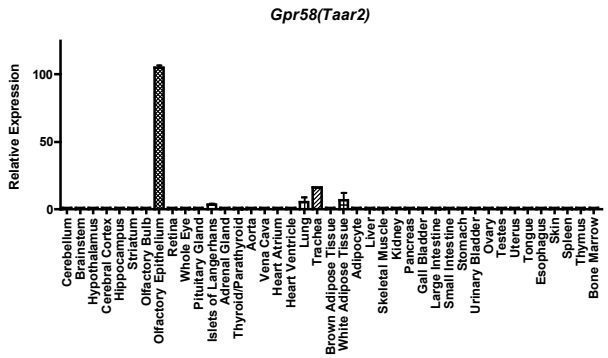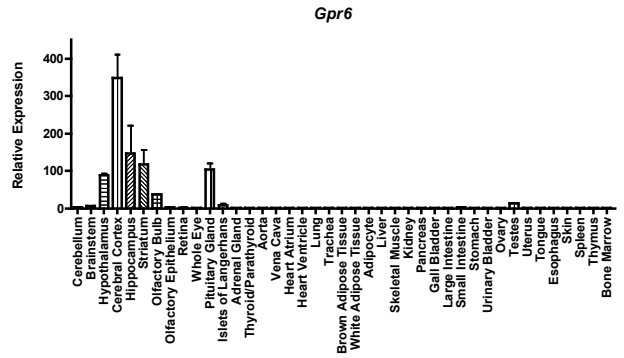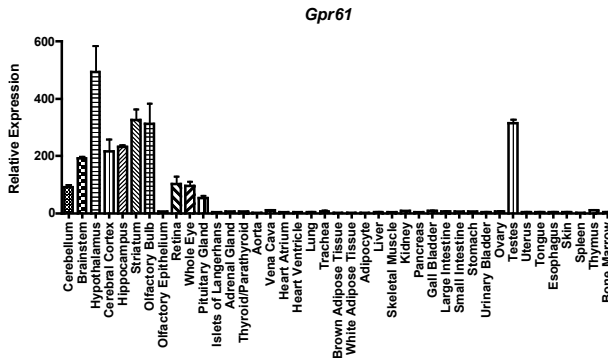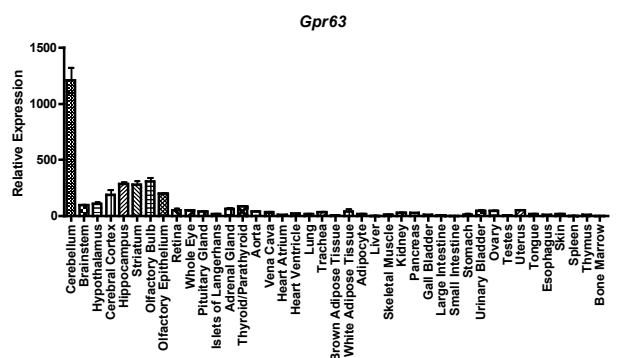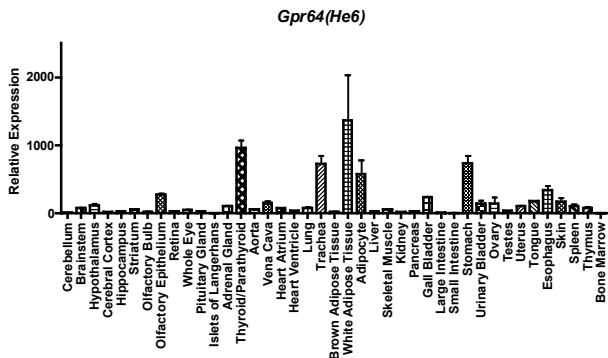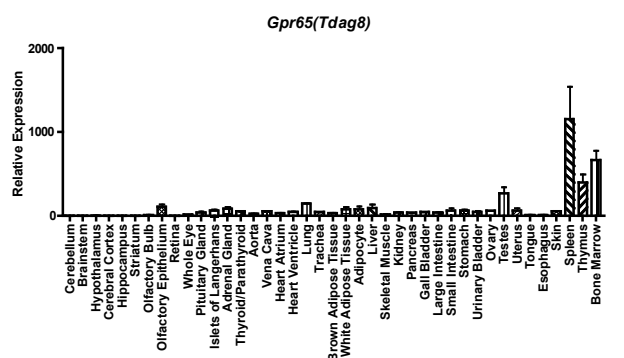

*Gpr66(Nmur1)*

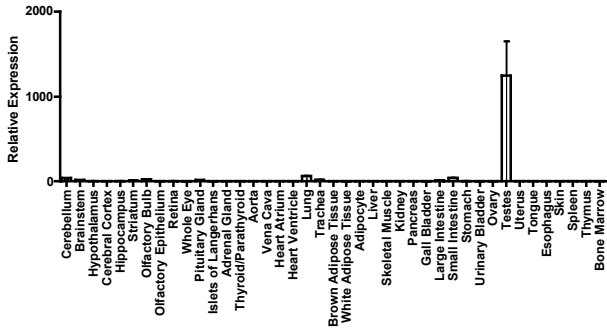

*Gpr68*

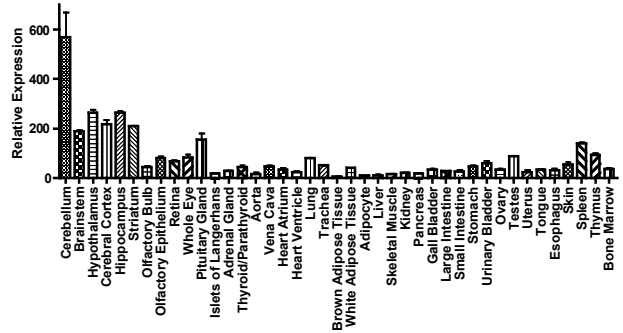

*Gpr7(Npbwr1)*

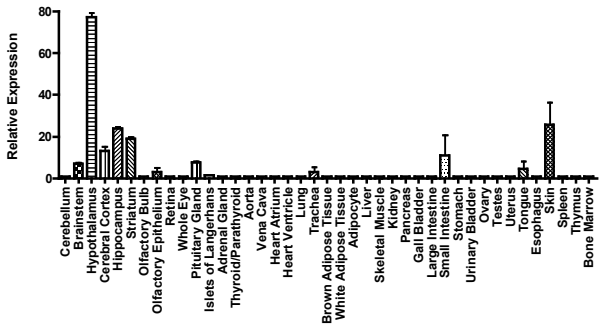

*Gpr73(Prokr1)*

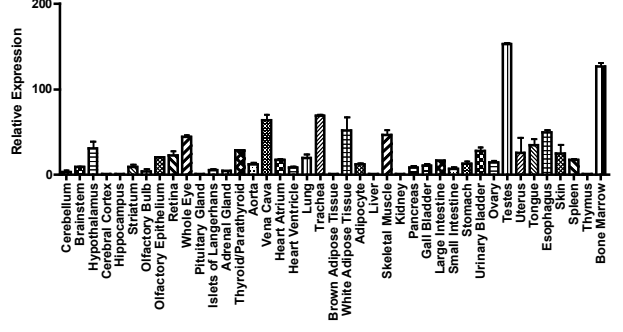

*Gpr7311(Prokr2)*

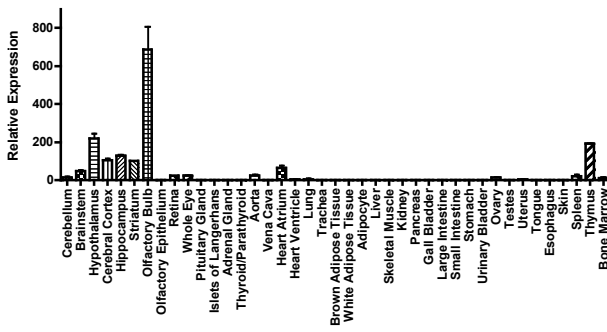

*Gpr74(Npffr2)*

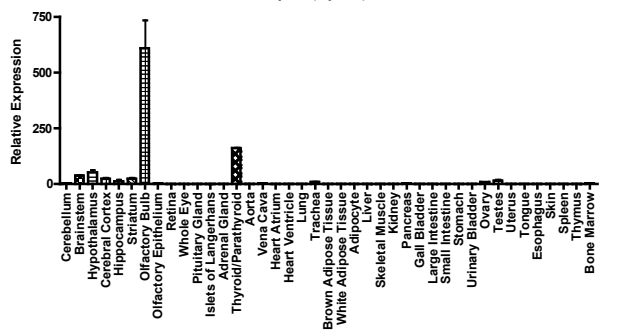

*Gpr75*

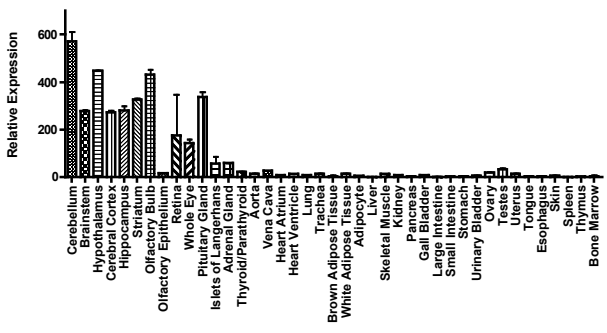

*Gpr77(C512)*

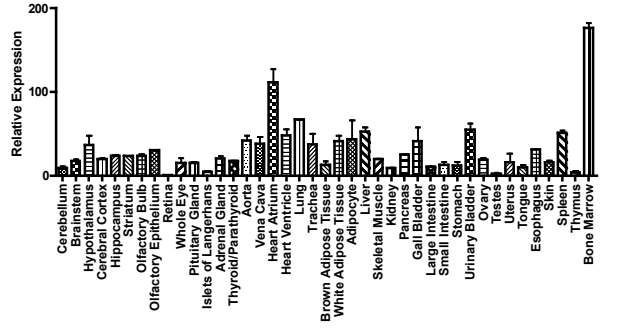

# Regard et al. Mouse GPCRs Page 23

**Gpr80(Oxgr1)**

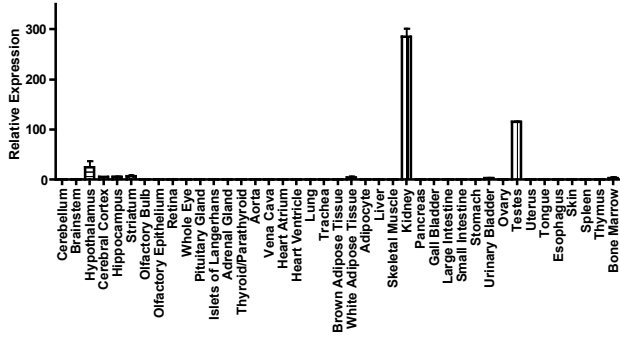

**Gpr81**

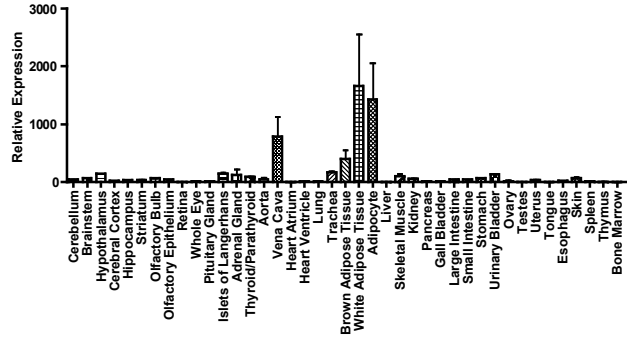

**Gpr82**

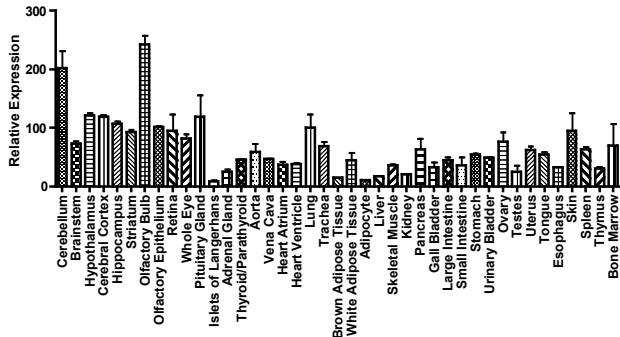

**Gpr83**

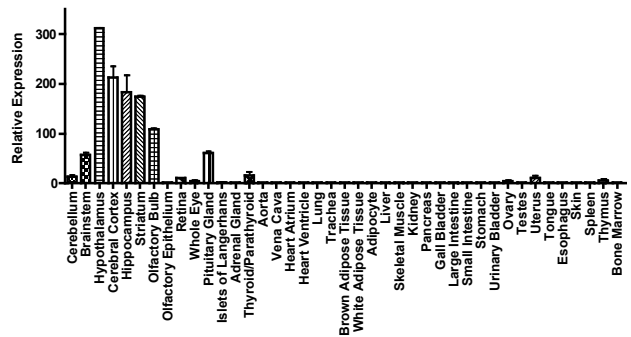

**Gpr85**

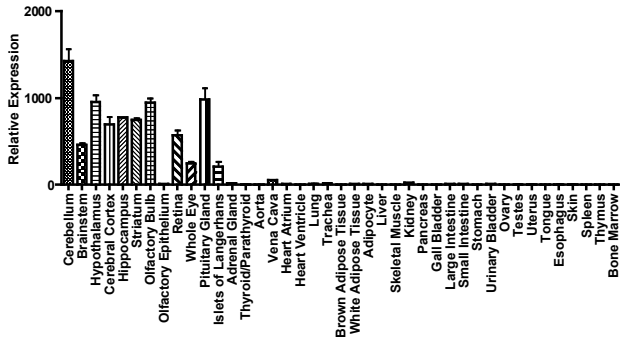

**Gpr86(P2ry13)**

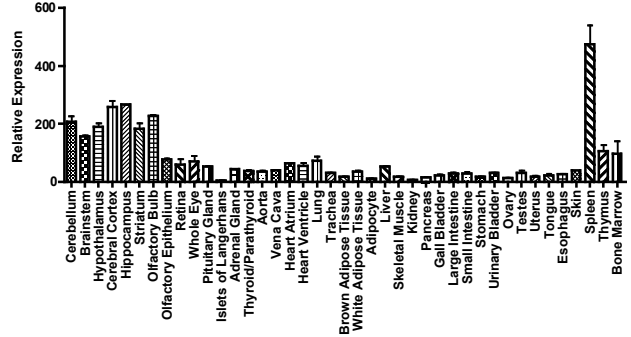

**Gpr87**

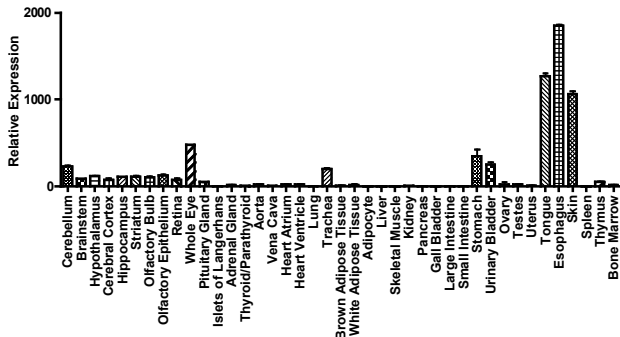

**Gpr88**

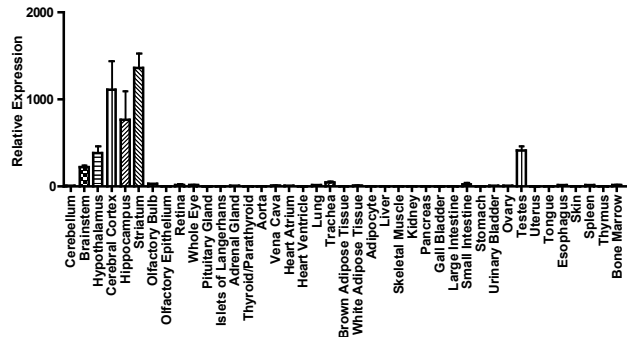

# Regard et al. Mouse GPCRs Page 24

**Gpr9(Cxcr3)**

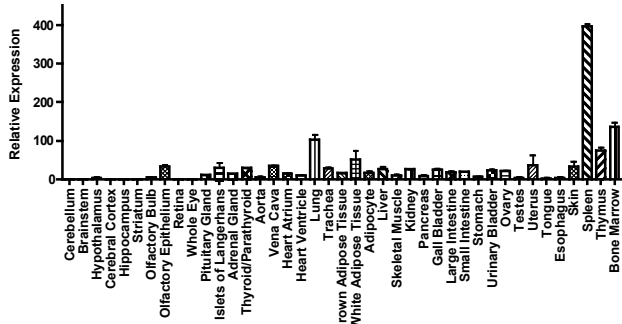

**Gpr90(Mrgprh)**

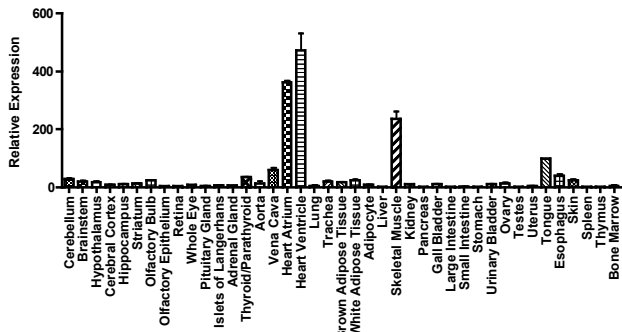

**Gpr91(Sucnr1)**

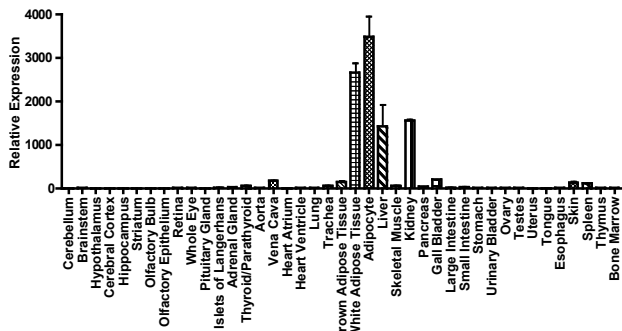

**Gpr92(Lpa5)**

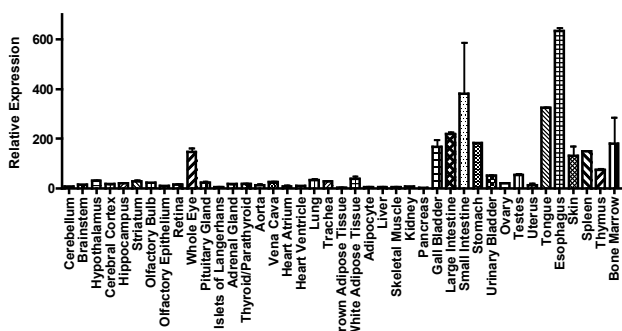

**Gprc5b(Raig2)**

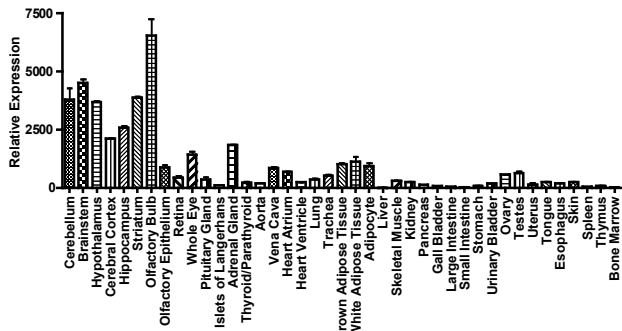

**Gprc5c**

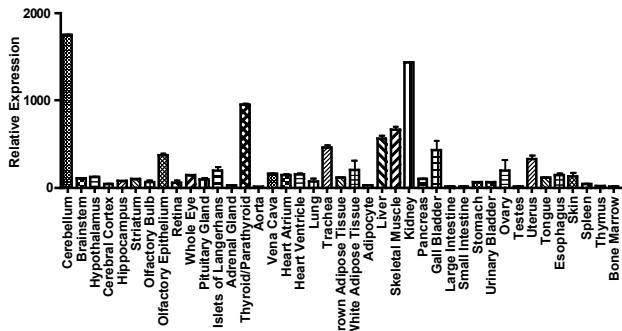

**Gprc5d**

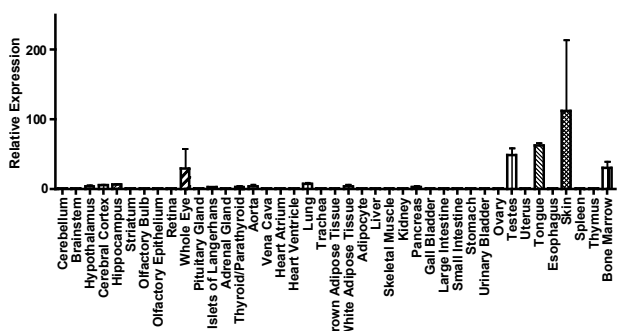

**Gprc6a**

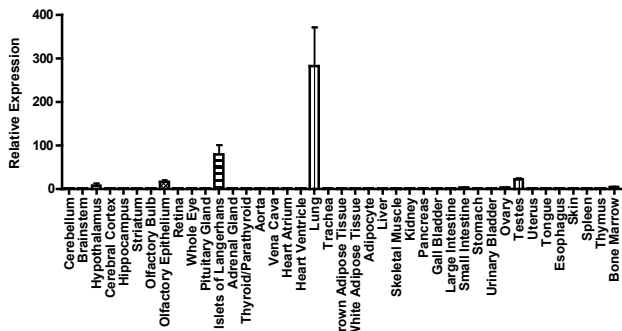



# Regard et al. Mouse GPCRs Page 25

**Grca(Gpr162)**

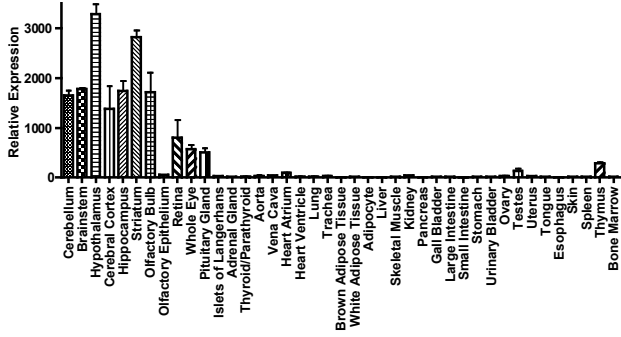

**Grm1(Mglur1)**

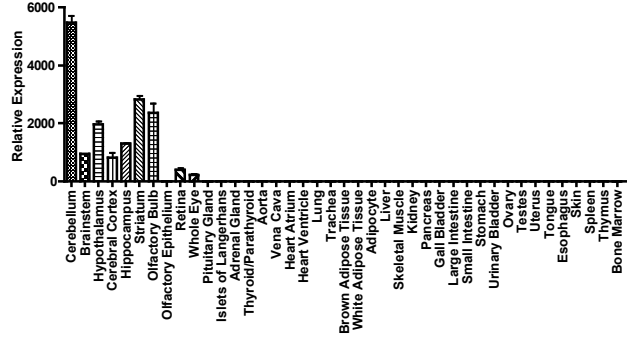

**Grm2(Mglur2)**

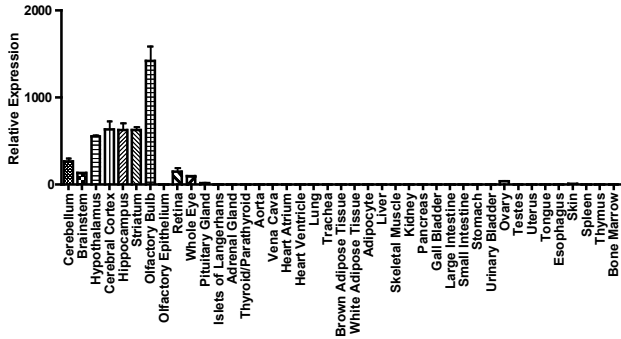

**Grm3(Mglur3)**

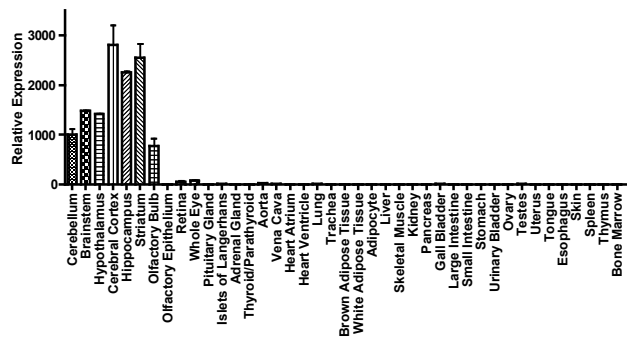

**Grm4(Mglur4)**

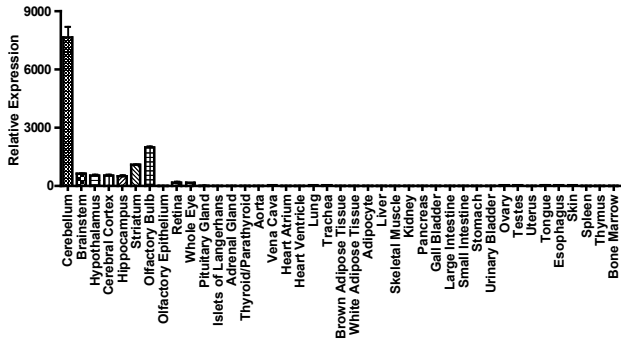

**Grm5(Mglur5)**

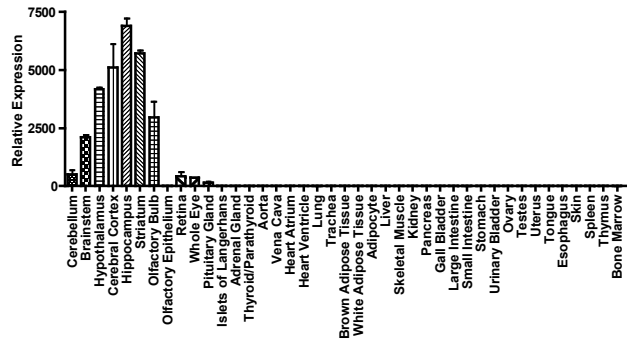

**Grm6(Mglur6)**

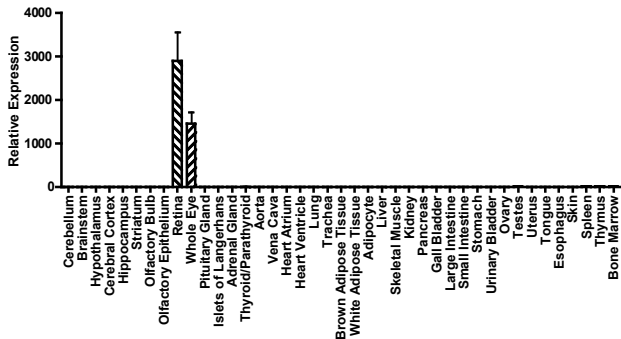

**Grm7(Mglur7)**

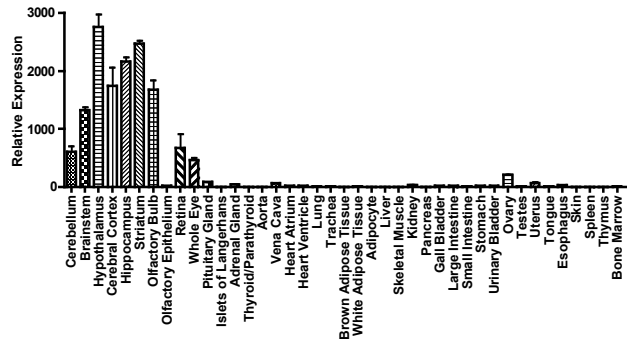

# Regard et al. Mouse GPCRs Page 26

***Grm8(Mglur8)***

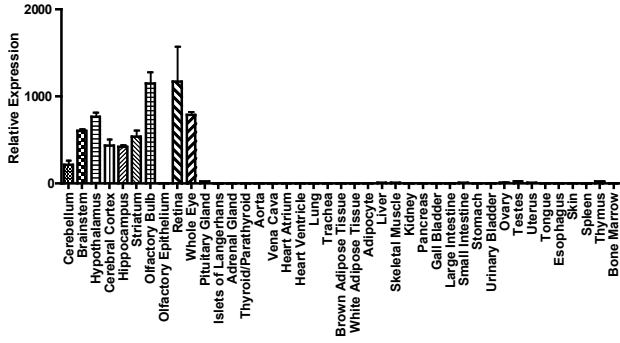

***Grpr***

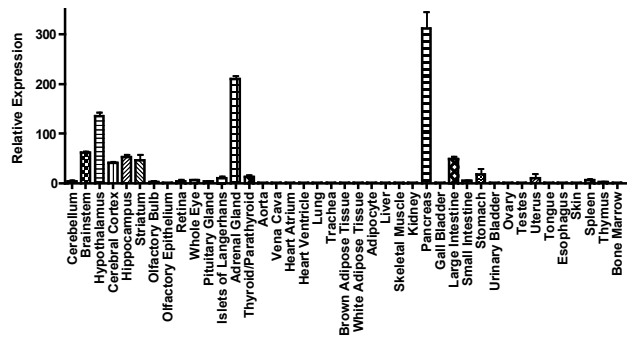

***H963(Gpr171)***

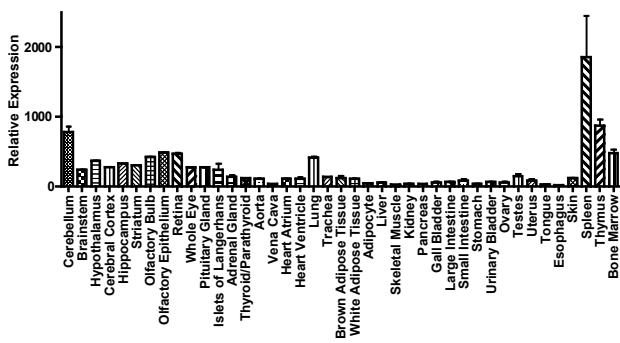

***Hctr1(Ox1r)***

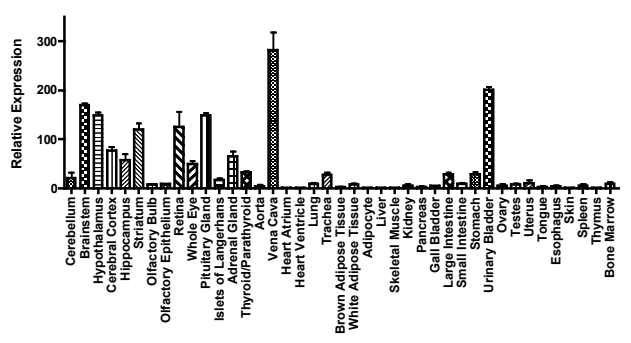

***Hctr2(Ox2r)***

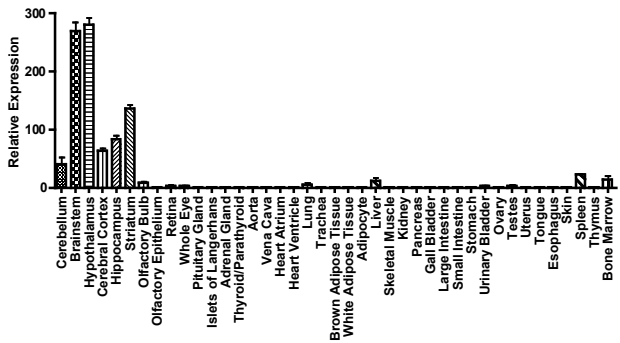

***Hgpcr11(Rxpf4)***

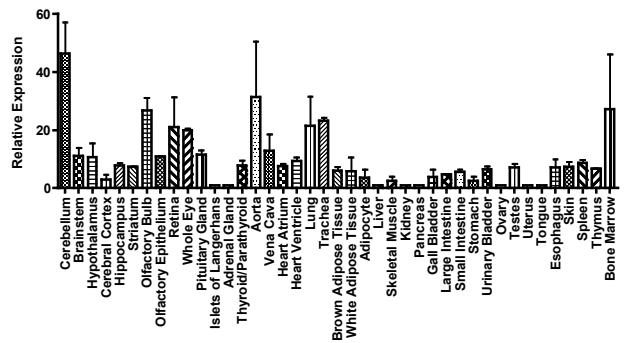

***Hgpcr19(Gpbar1)***

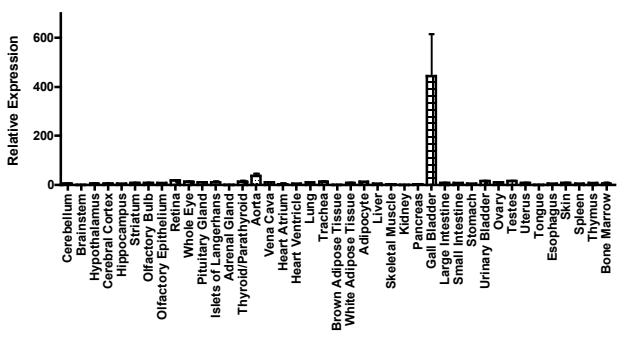

***Hgpcr2(Gpr119)***

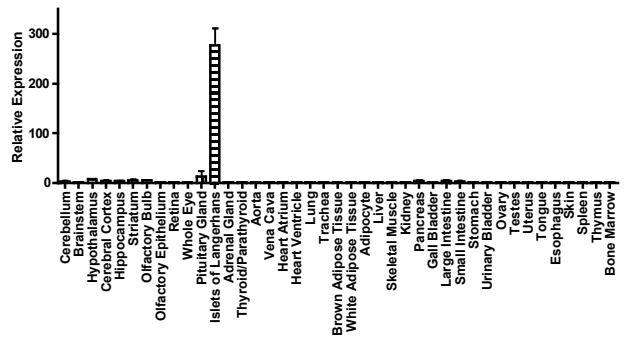

# Regard et al. Mouse GPCRs Page 27

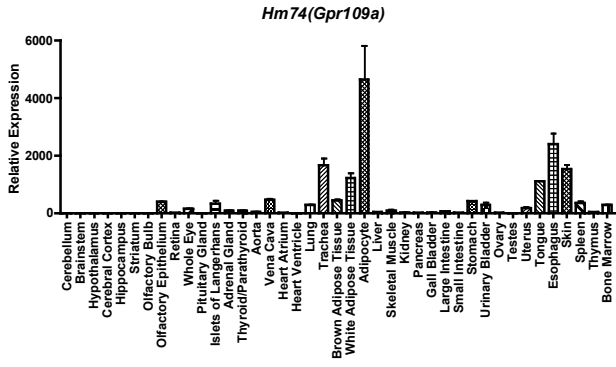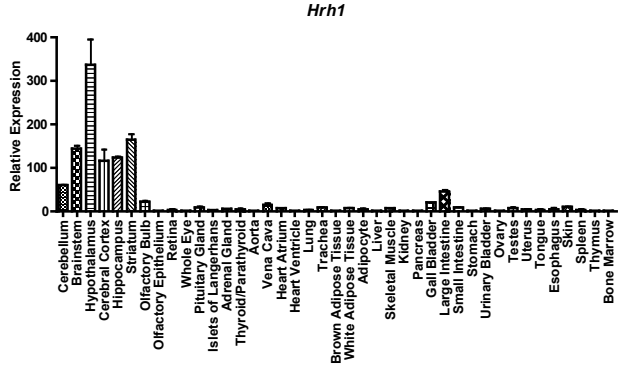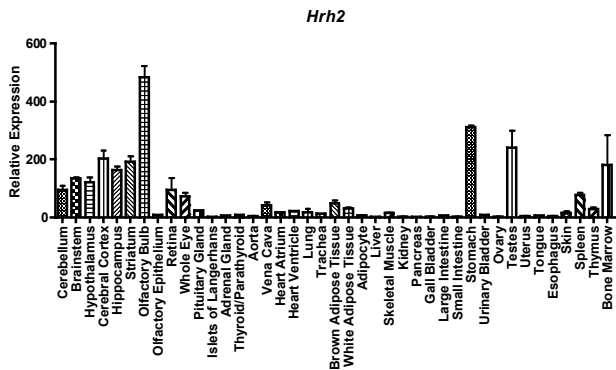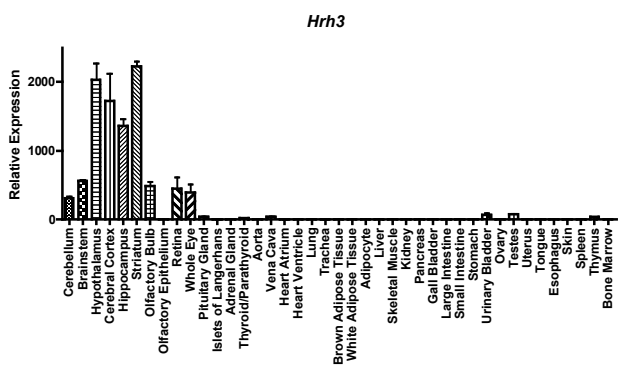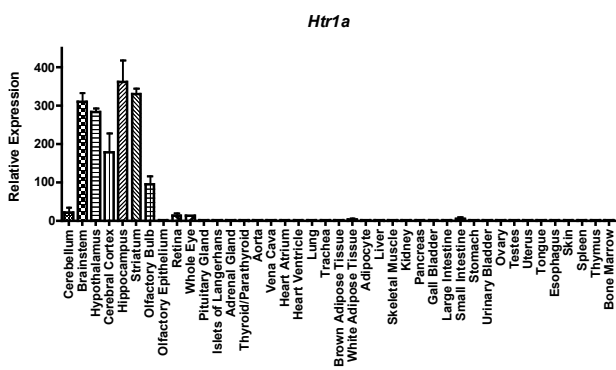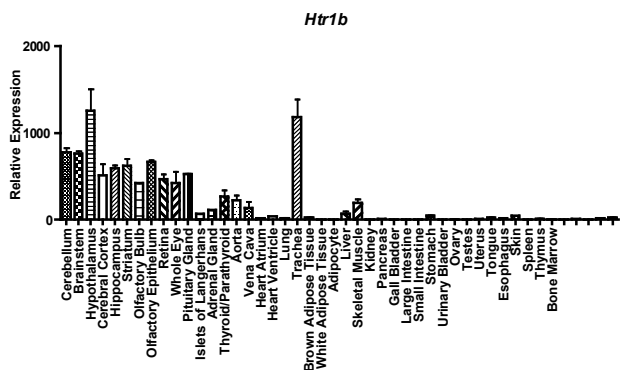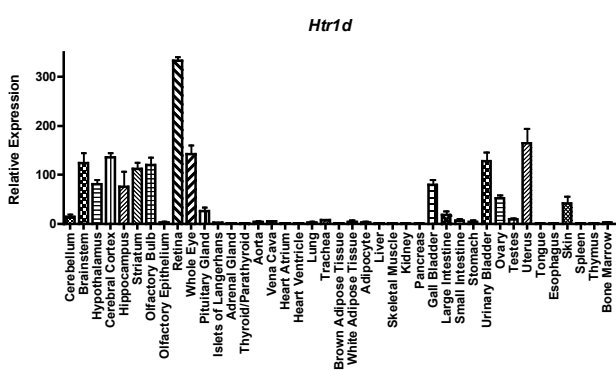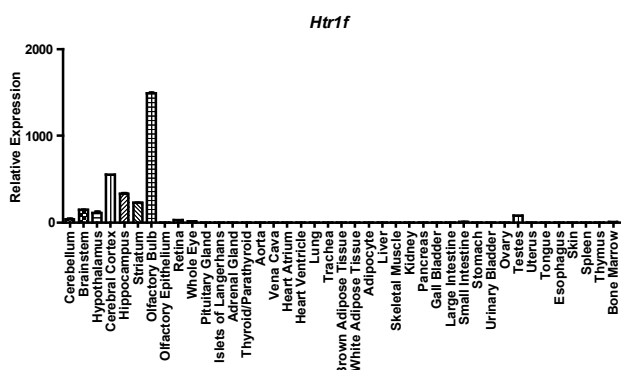

# Regard et al. Mouse GPCRs Page 28

**Htr2a**

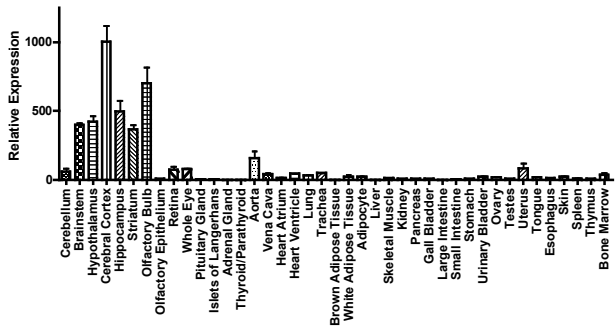

**Htr2b**

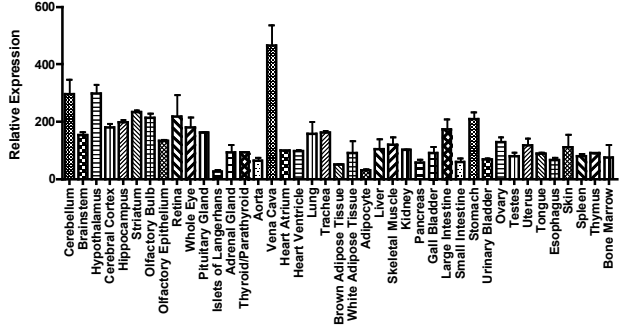

**Htr2c**

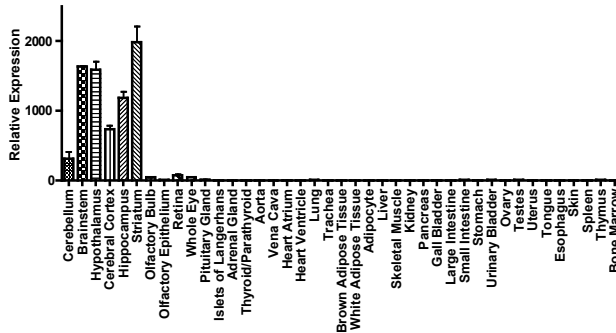

**Htr5a**

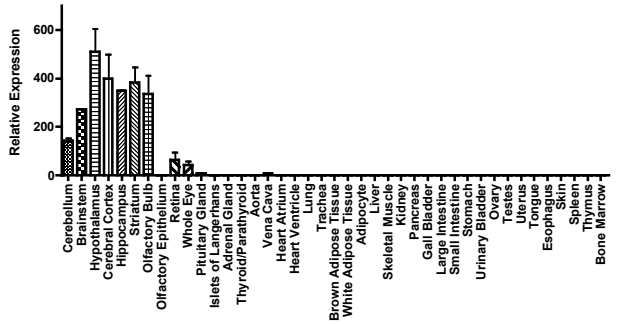

**Htr5b**

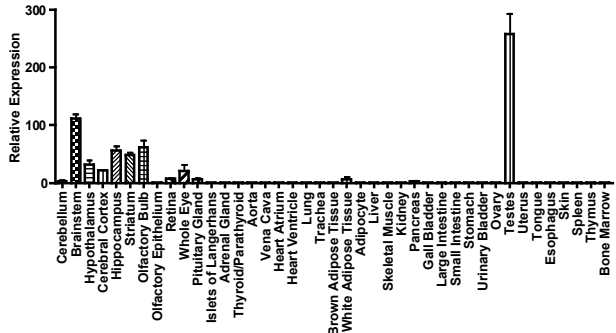

**Htr6**

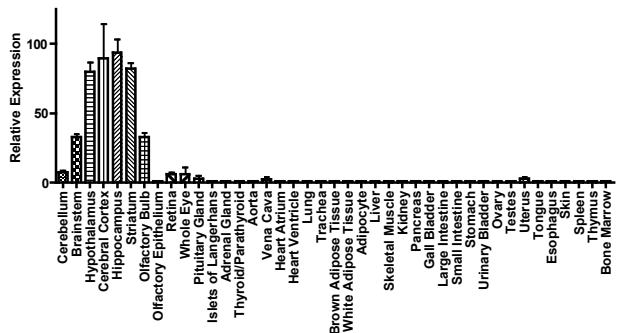

**Htr7**

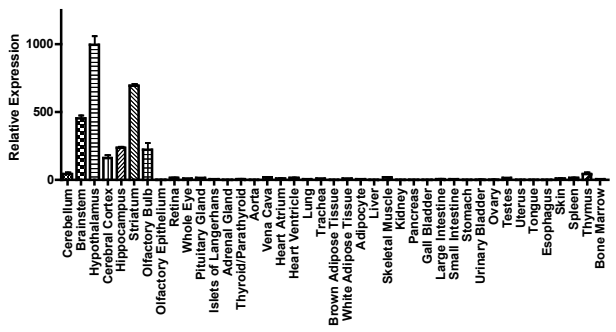

**Humppiiy20(Gpr135)**

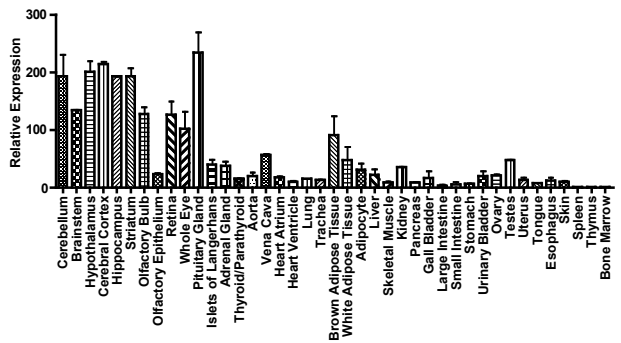

# Regard et al. Mouse GPCRs Page 29

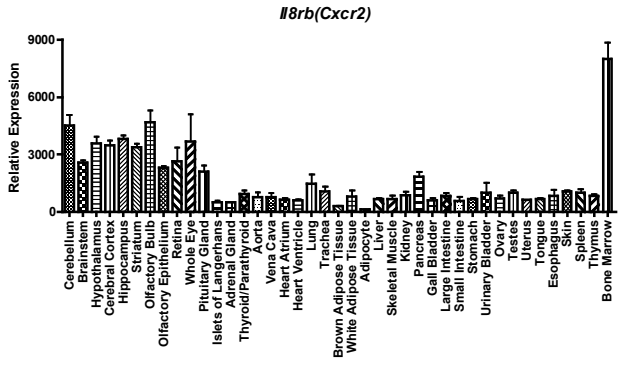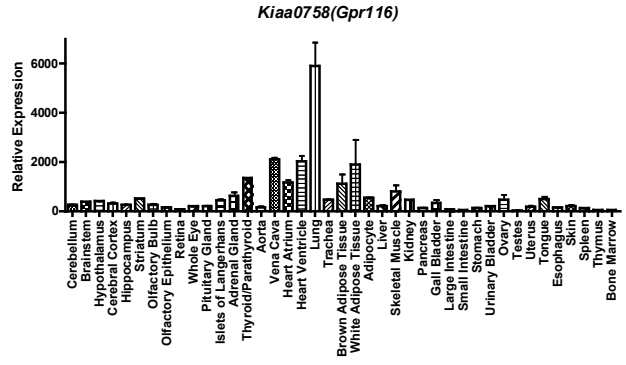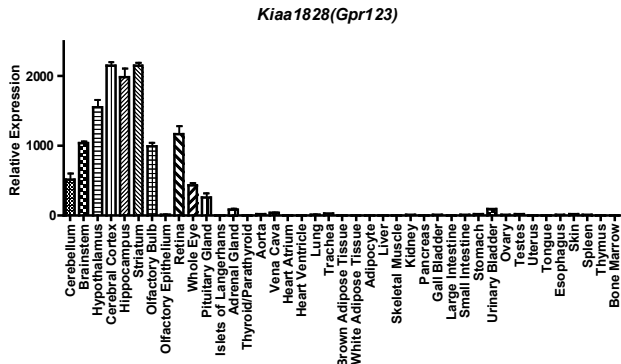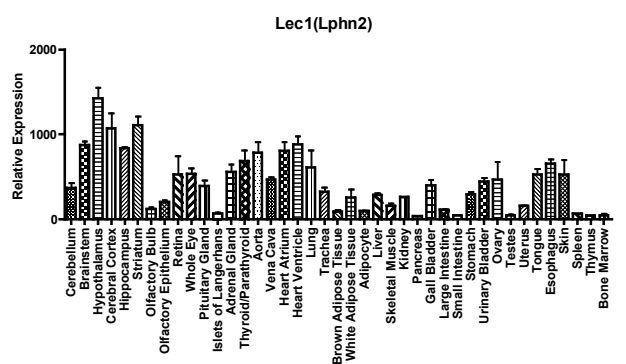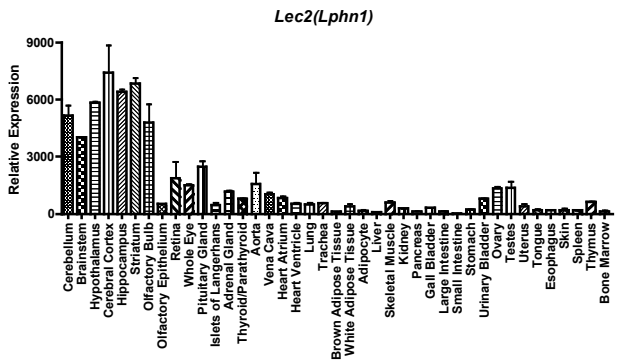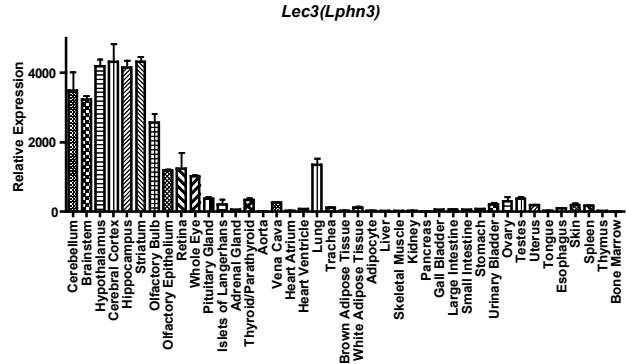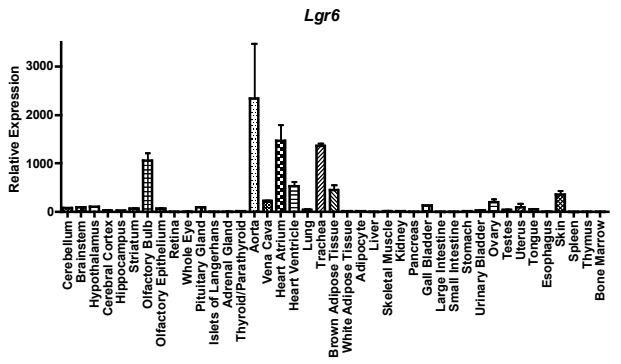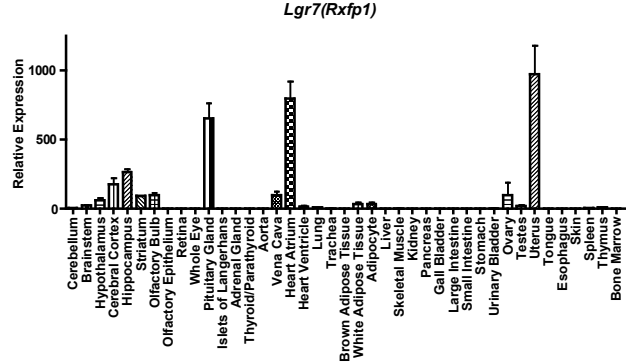

# Regard et al. Mouse GPCRs Page 30

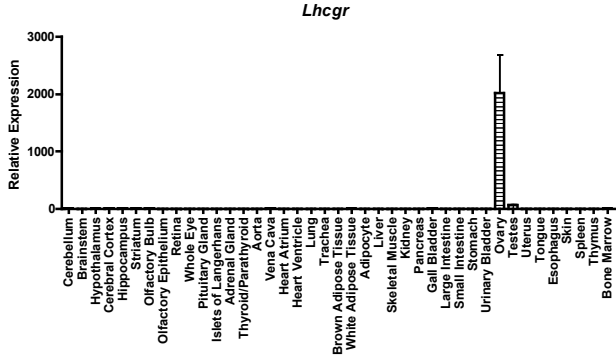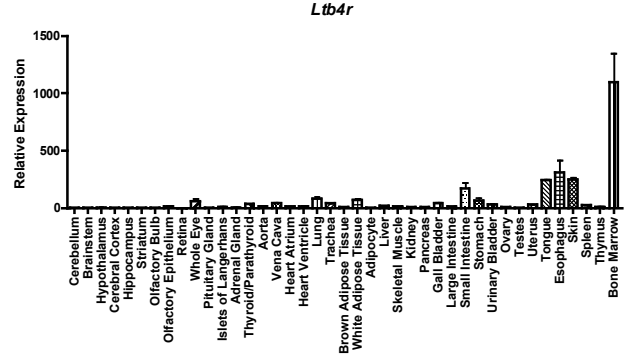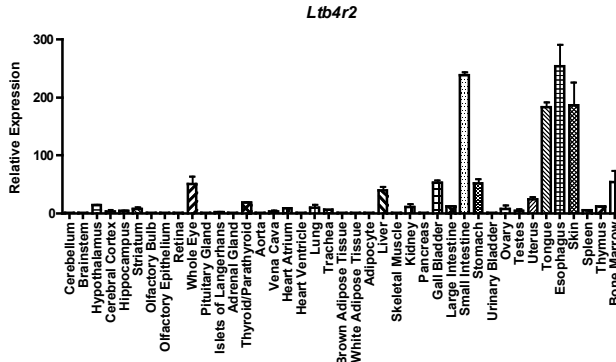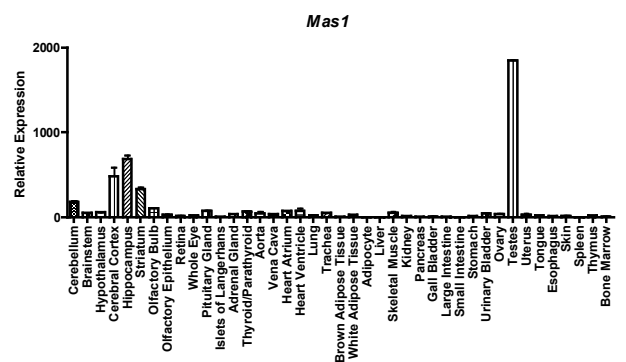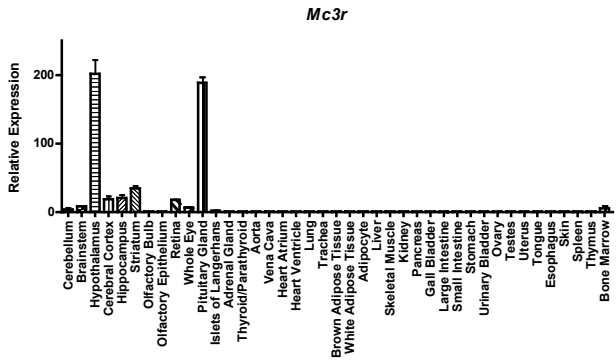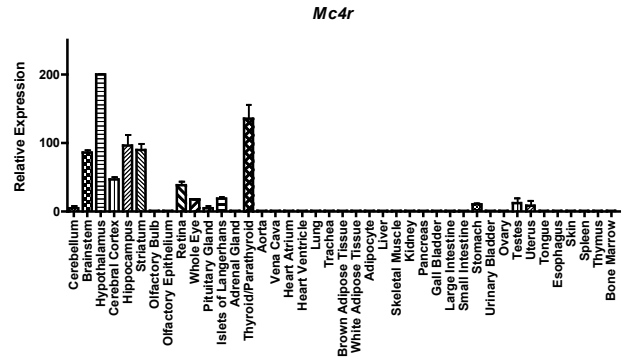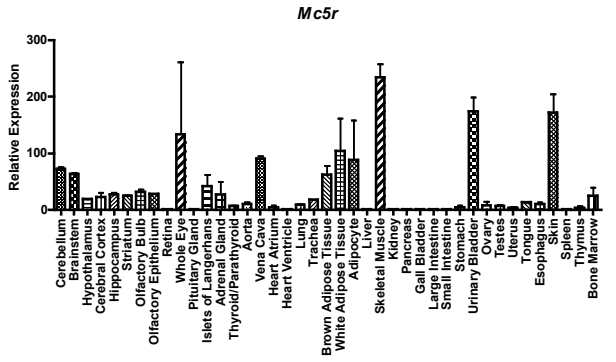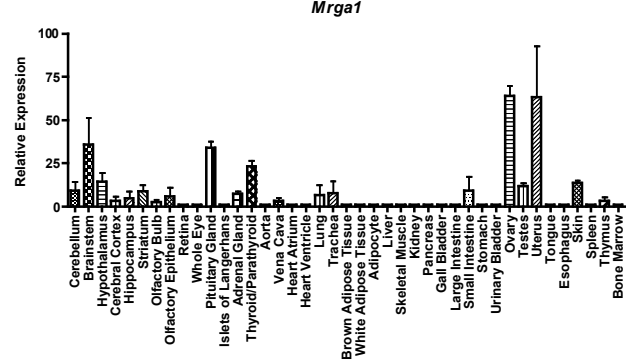

# Regard et al. Mouse GPCRs Page 31

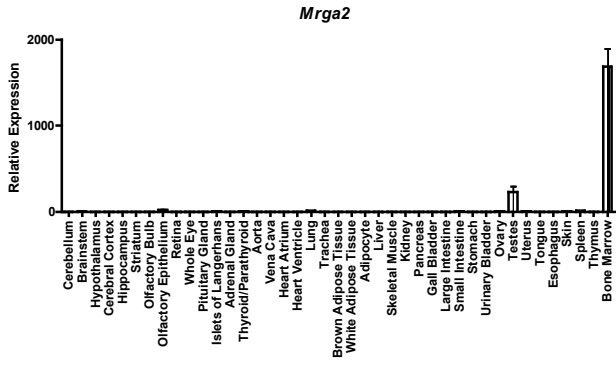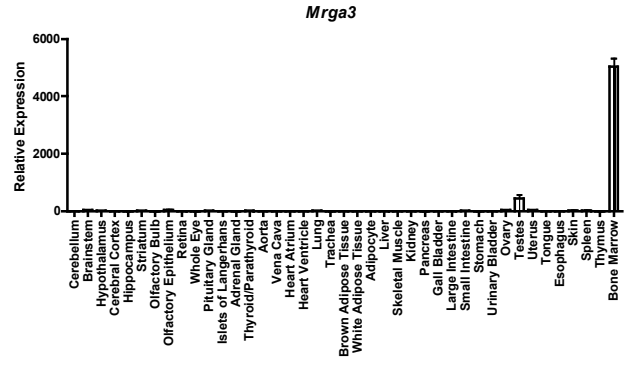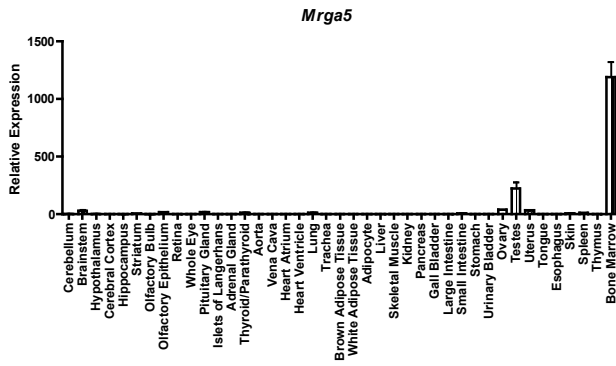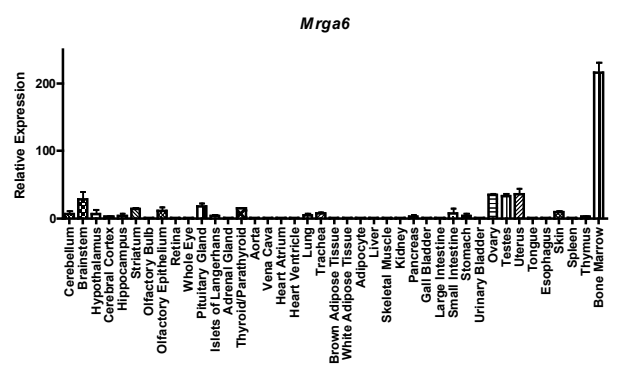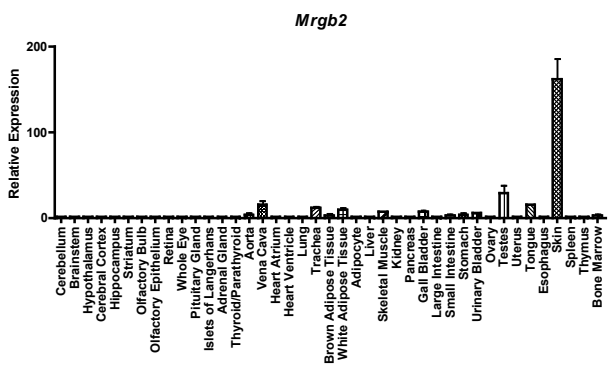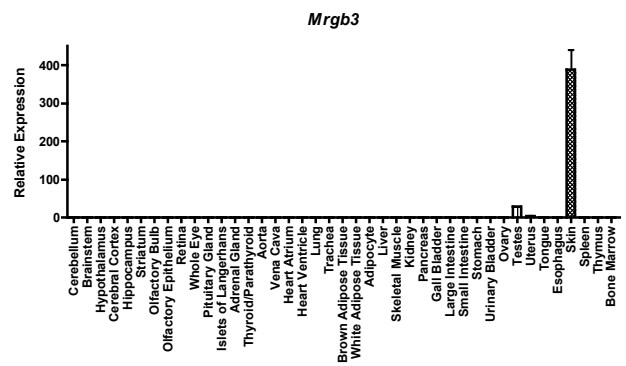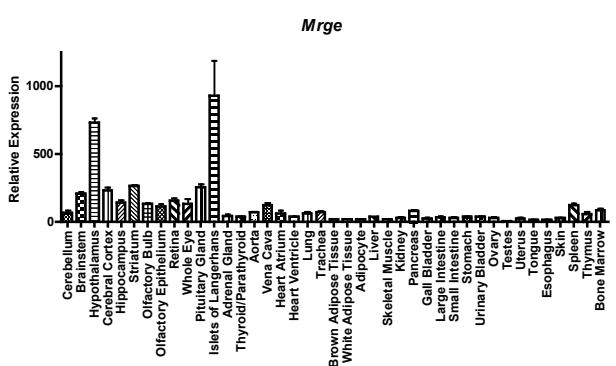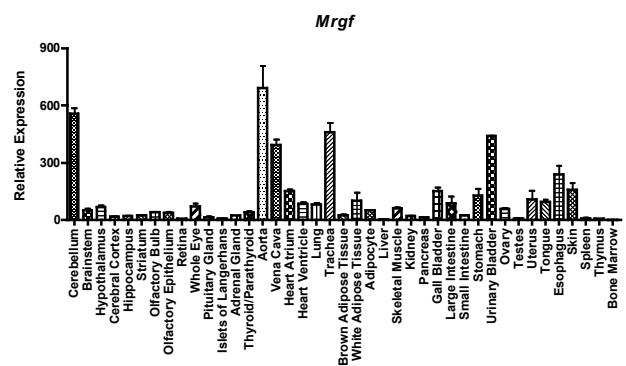

# Regard et al. Mouse GPCRs Page 32

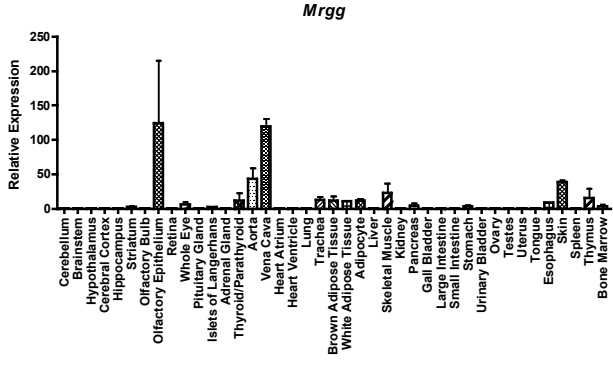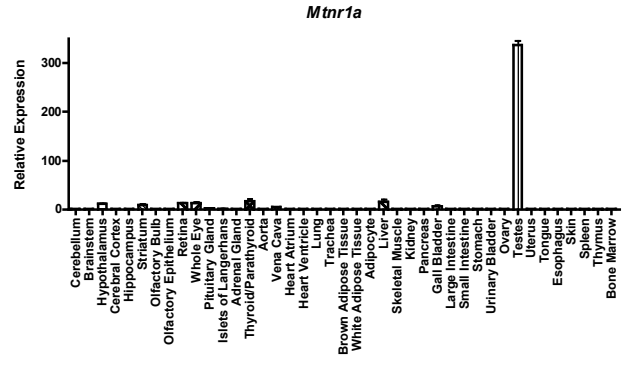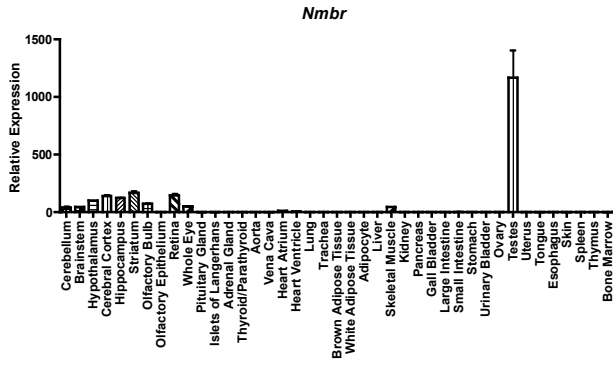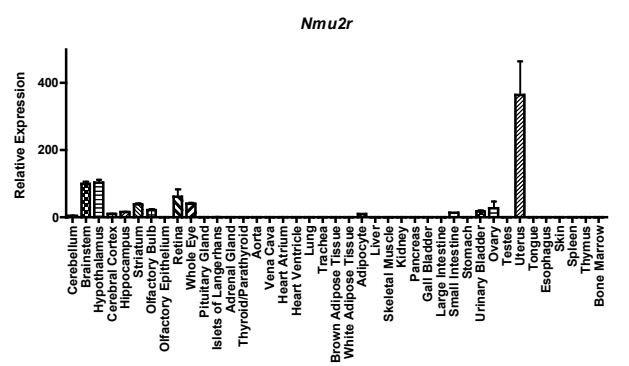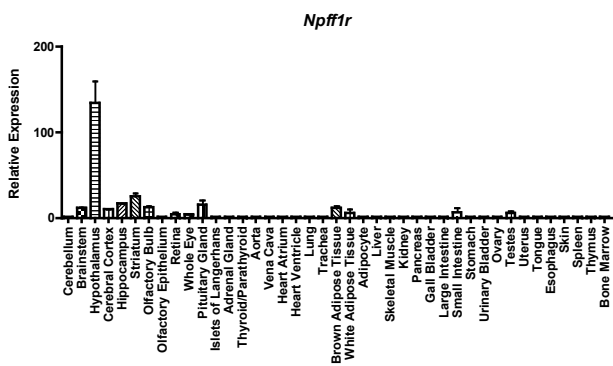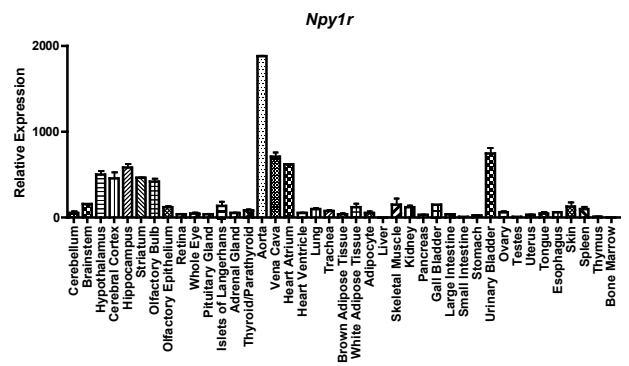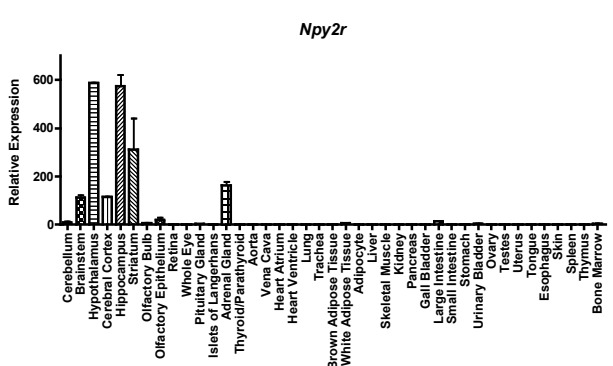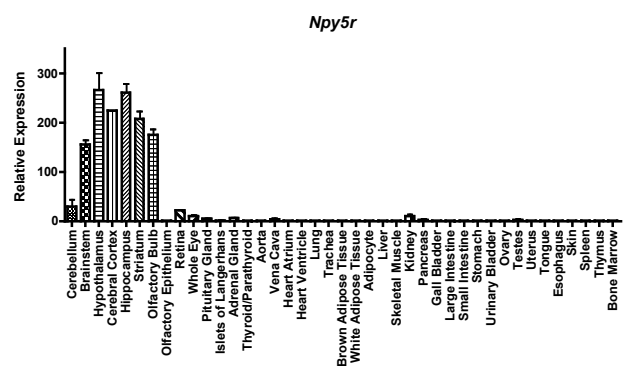



# Regard et al. Mouse GPCRs Page 33

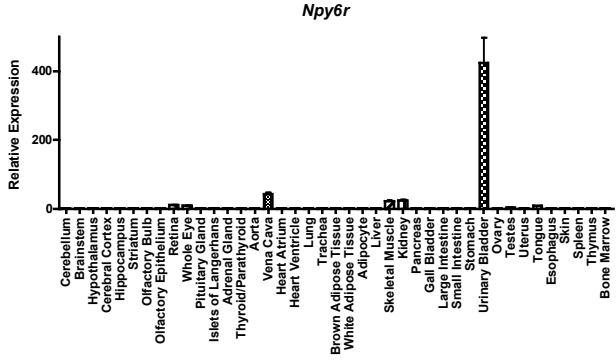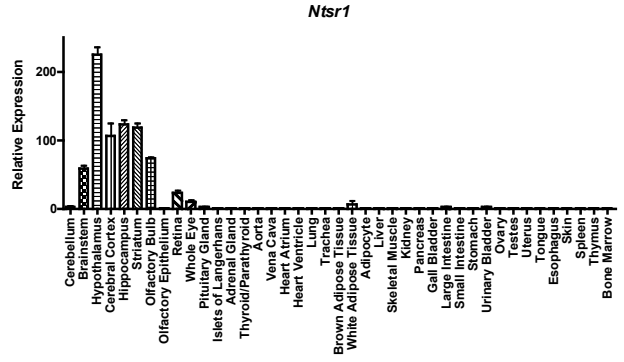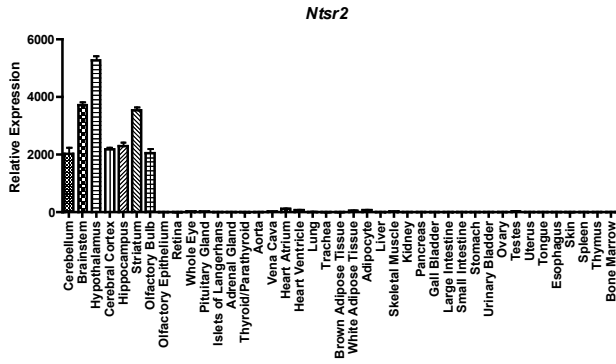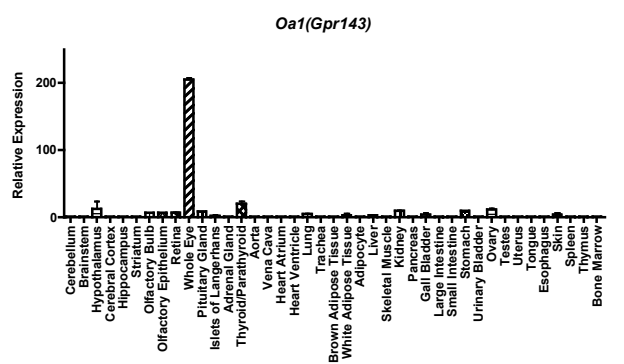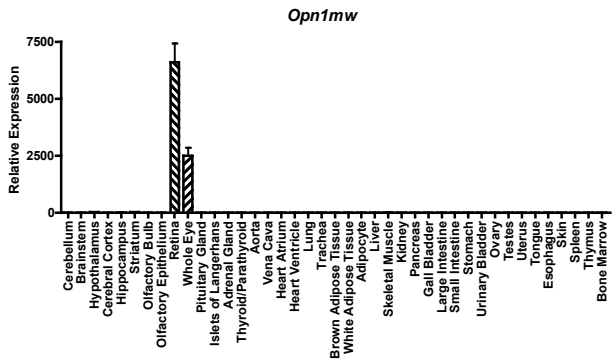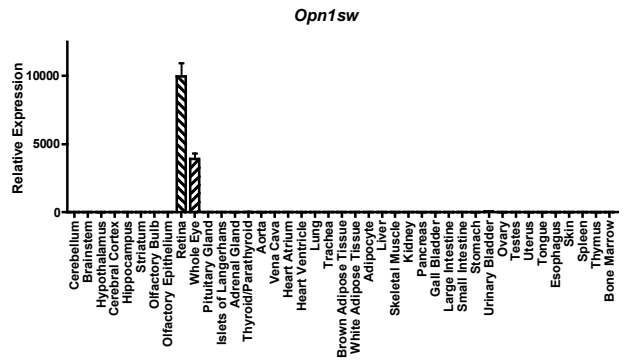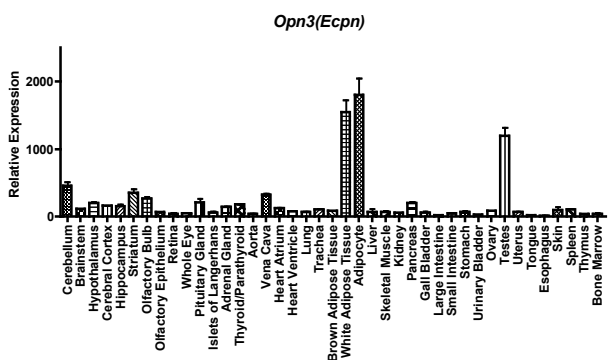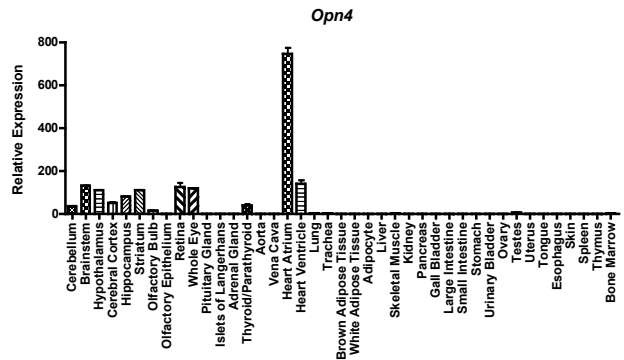

# Regard et al. Mouse GPCRs Page 34

*Opr1*

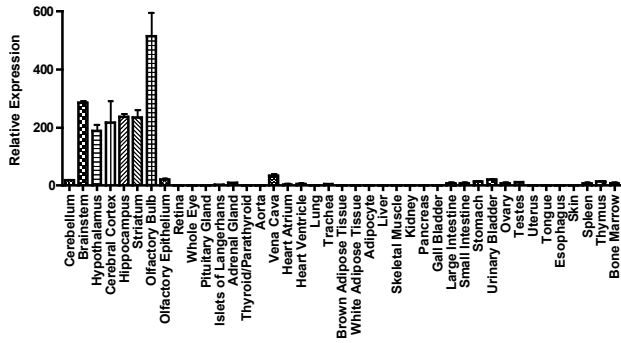

*Oprk1*

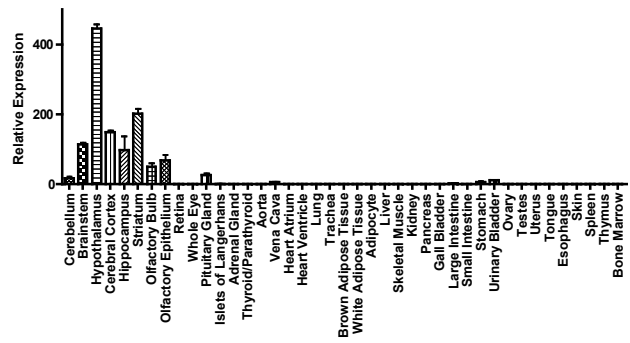

*Oprl1*

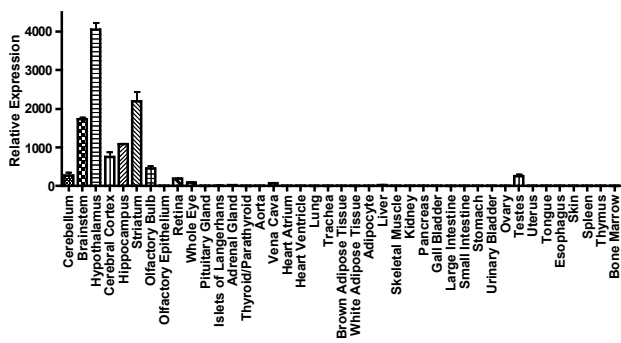

*Oprm1*

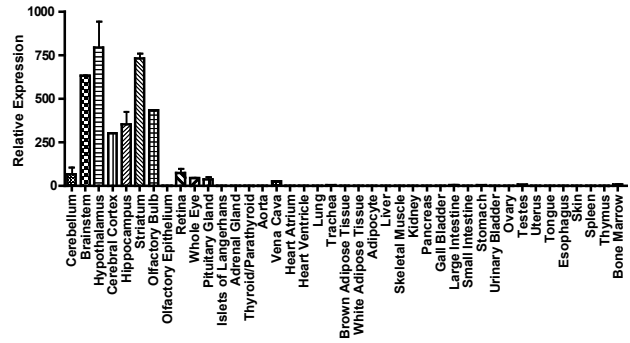

*Oxtr*

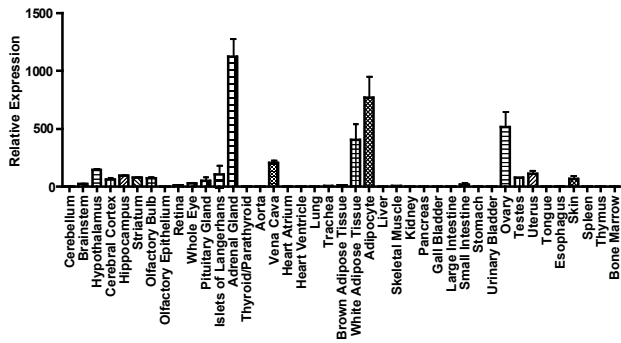

*P2ry1*

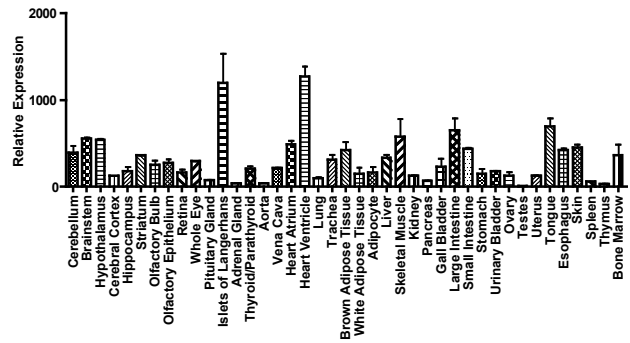

*P2ry12*

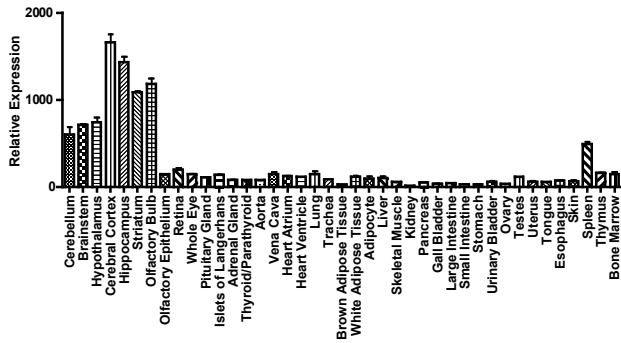

*P2ry2*

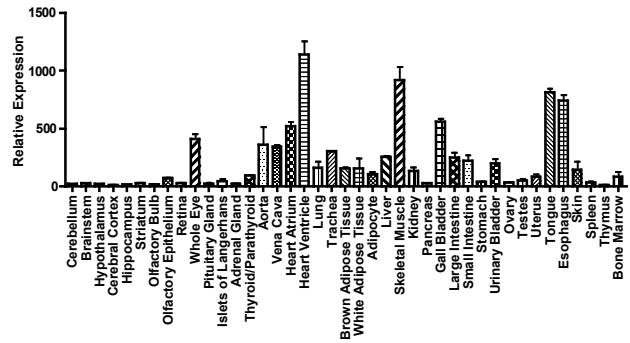

# Regard et al. Mouse GPCRs Page 35

**P2ry4**

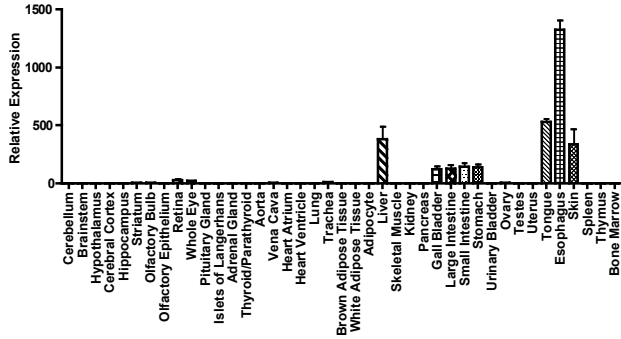

**P2ry6**

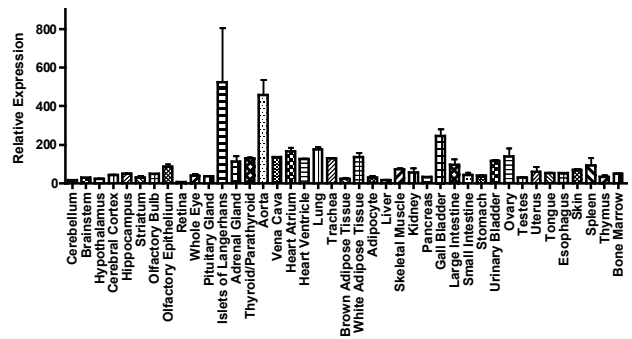

**P2y10**

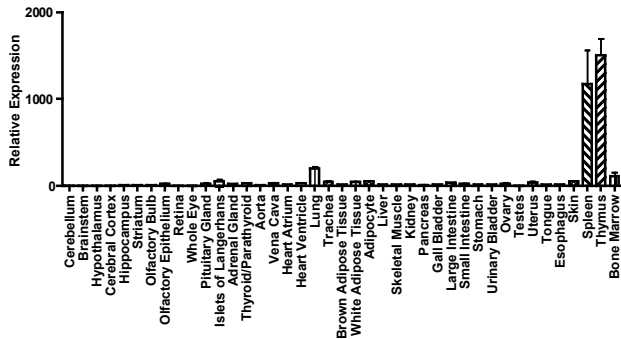

**P2y5**

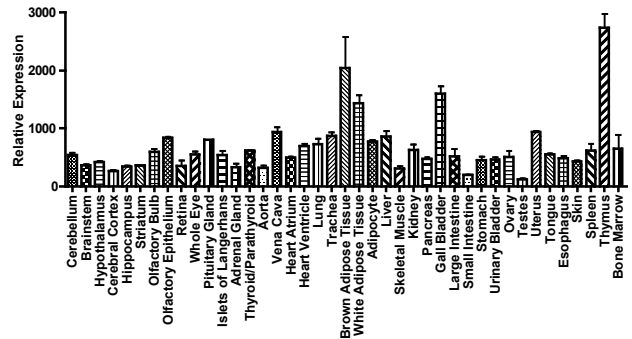

**Pg435l(Pgr15l)**

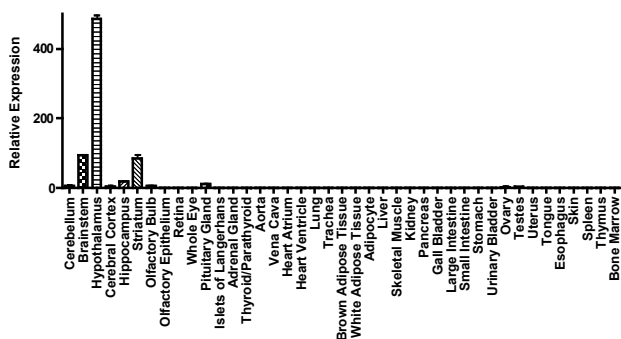

**Pgr1(Gpr153)**

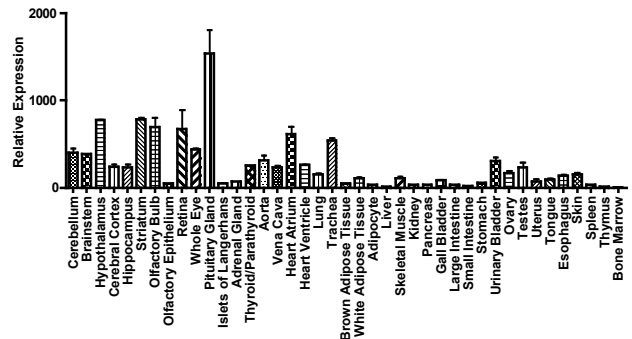

**Pgr10(Gpr149)**

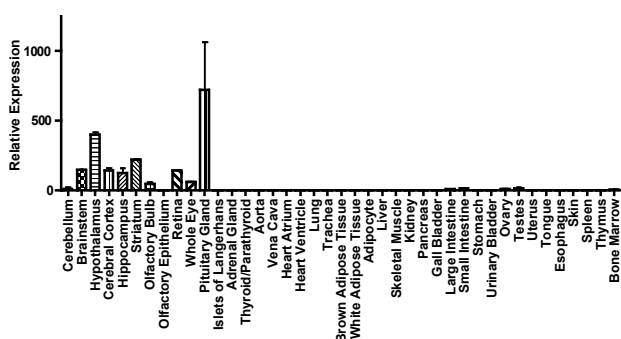

**Pgr11(Gpr150)**

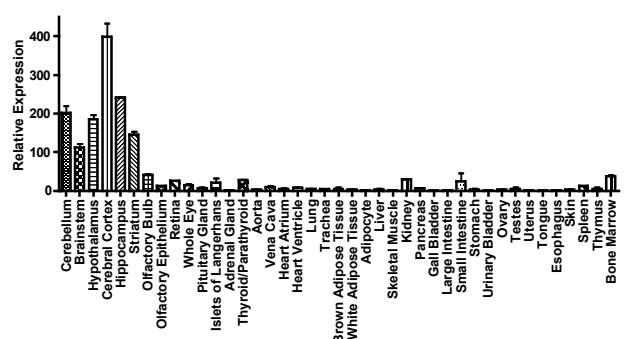

# Regard et al. Mouse GPCRs Page 36

*Pgr13(Gpr141)*

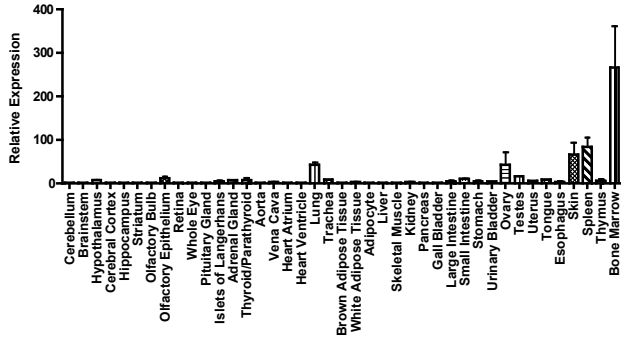

*Pgr14(Npsr1)*

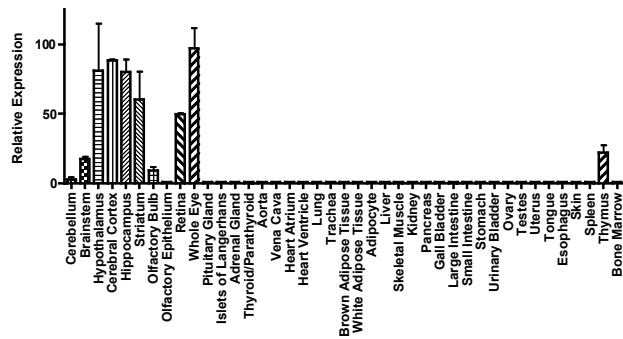

*Pgr15(Gpr165)*

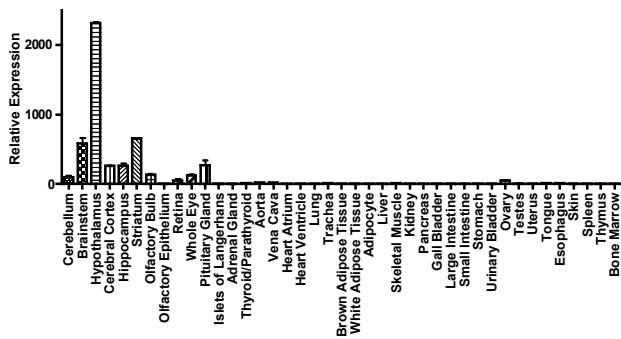

*Pgr16(Emr4)*

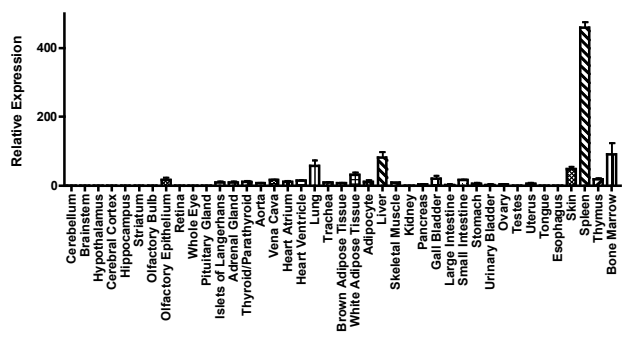

*Pgr18(Gpr115)*

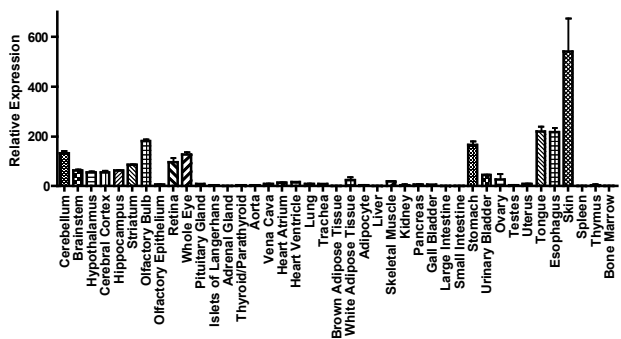

*Pgr19(Gpr110)*

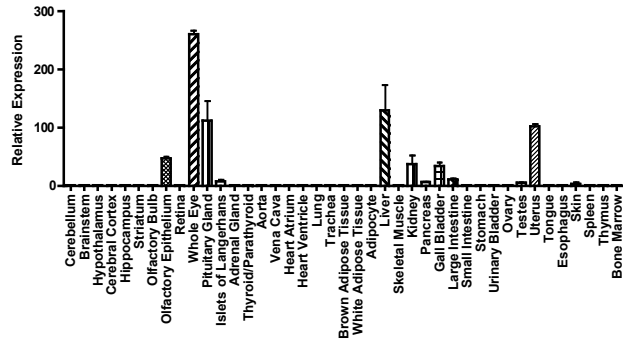

*Pgr2(Gpr142)*

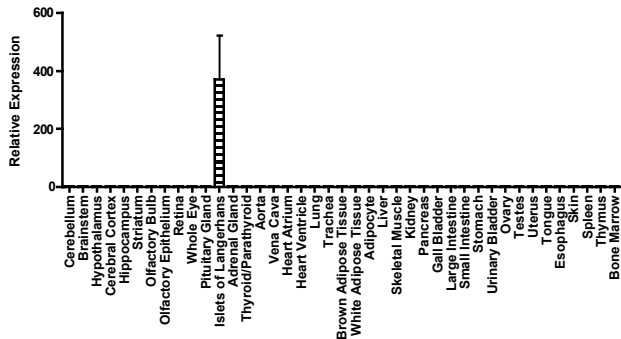

*Pgr20(Gpr111)*

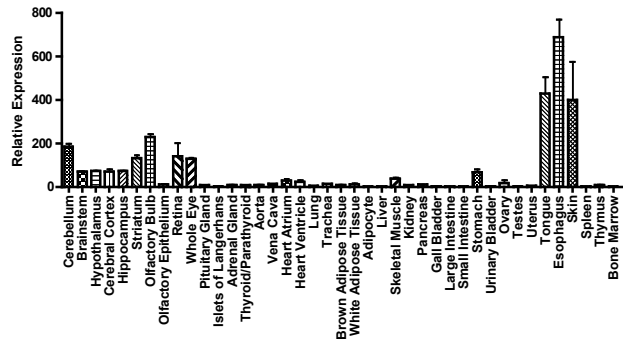

# Regard et al. Mouse GPCRs Page 37\

**Pgr21(Gpr125)**

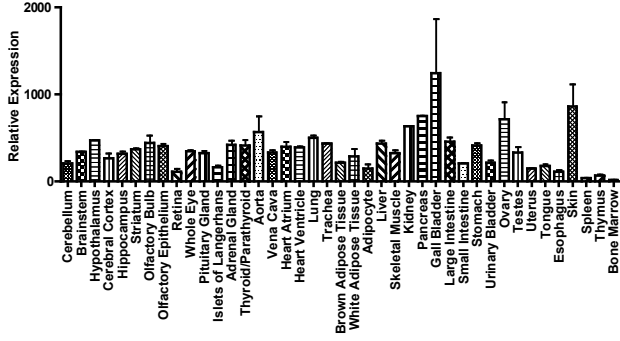

**Pgr22(Gpr155)**

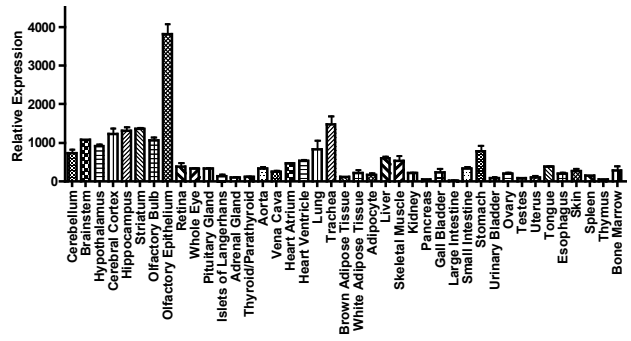

**Pgr23(Gpr113)**

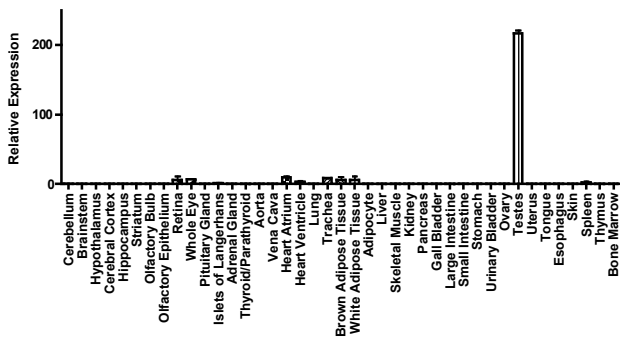

**Pgr25(Gpr133)**

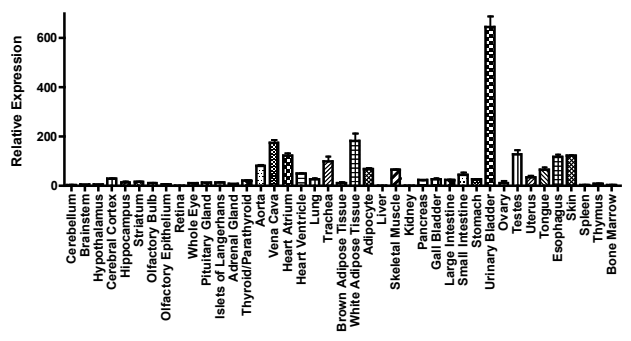

**Pgr26**

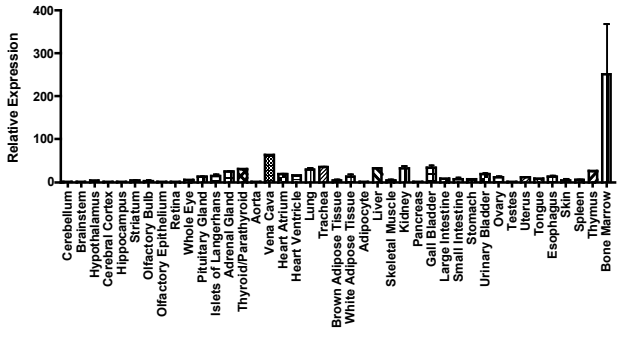

**Pgr27(Gpr114)**

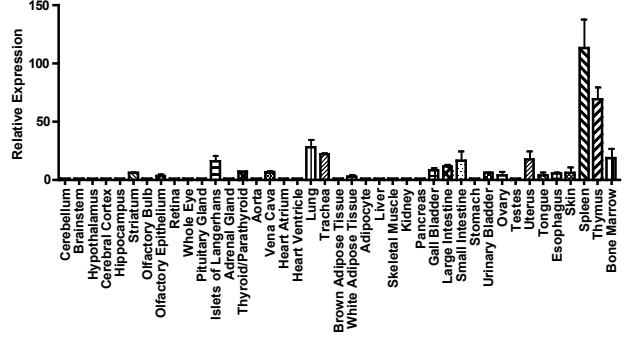

**Pgr3(Gpr139)**

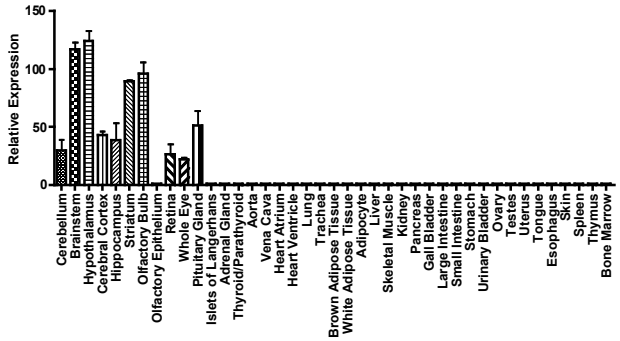

**Pgr4(Gpr120)**

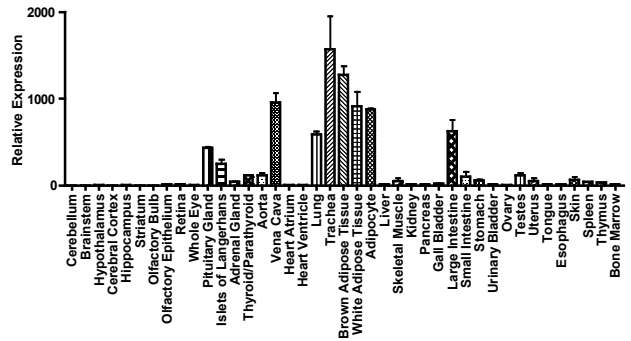

# Regard et al. Mouse GPCRs Page 38

**Pgr5(Gpr152)**

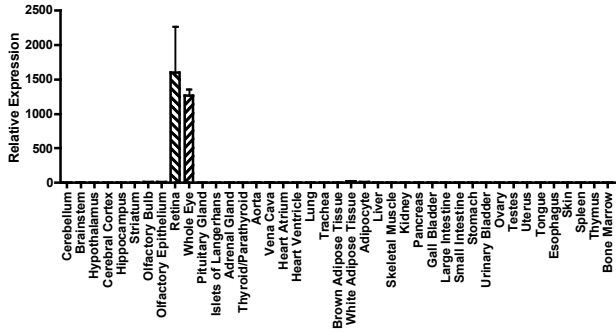

**Pgr7(Gpr151)**

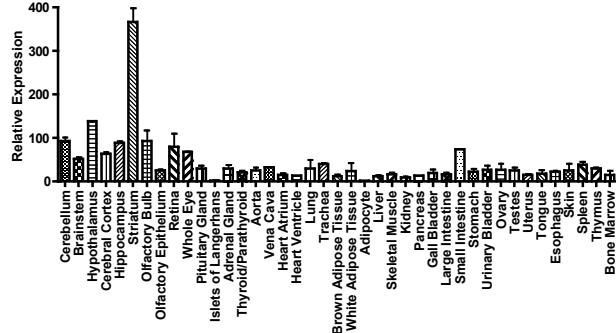

**Pgr8(Gpr146)**

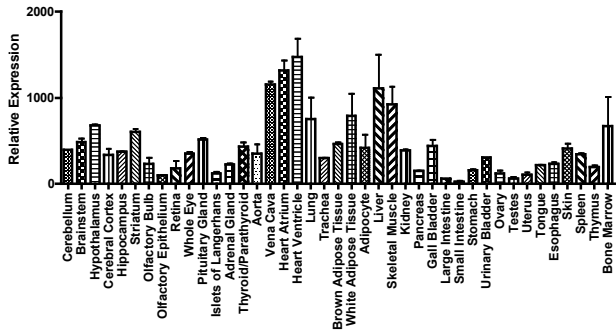

**Pnr(Taar5)**

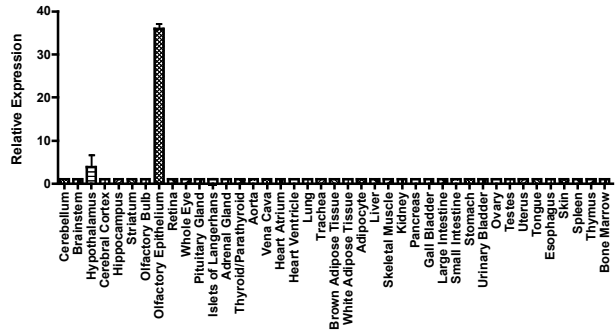

**Ppyr1(Npy4r)**

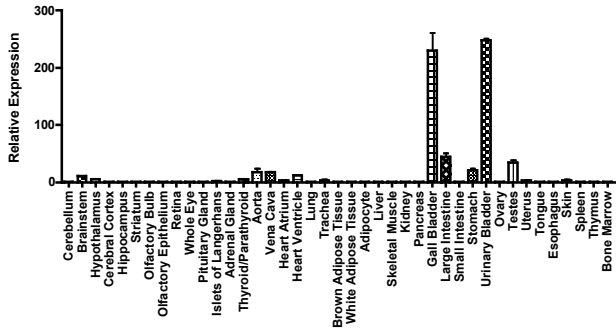

**Ptafr**

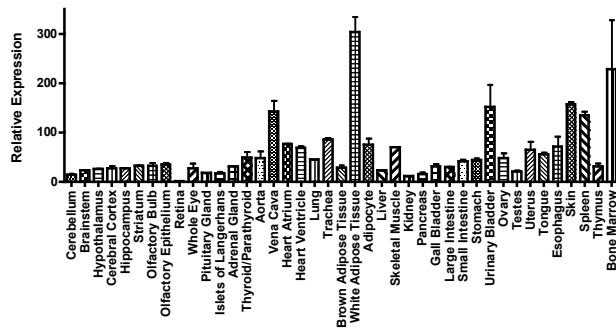

**Ptgdr**

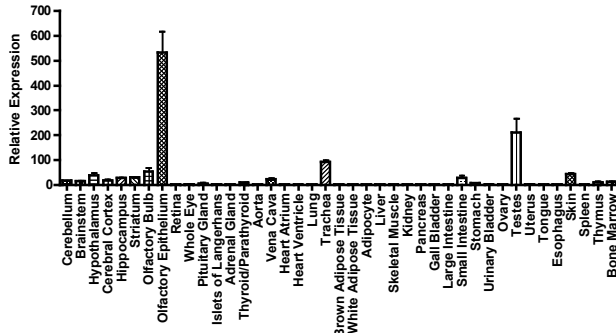

**Ptger1(Ep1)**

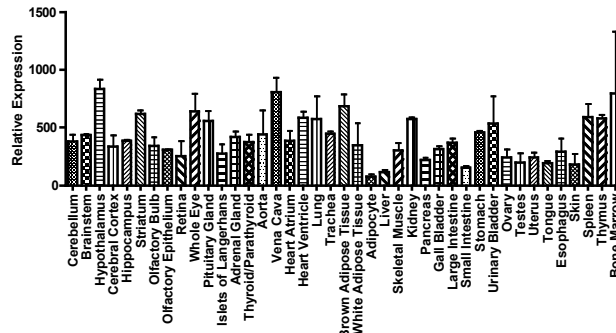

# Regard et al. Mouse GPCRs Page 39

*Ptger2*(Ep2)

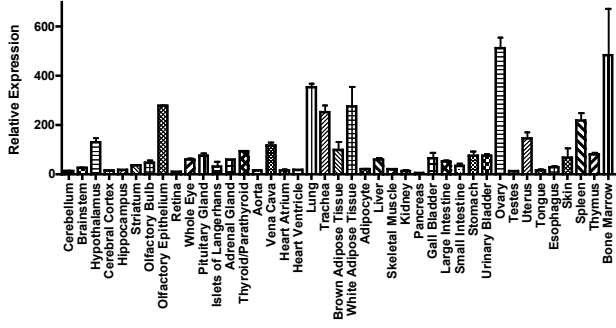

*Ptger3*(Ep3)

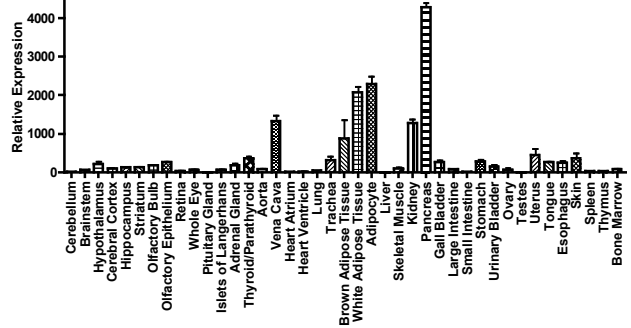

*Ptger4*(Ep4)

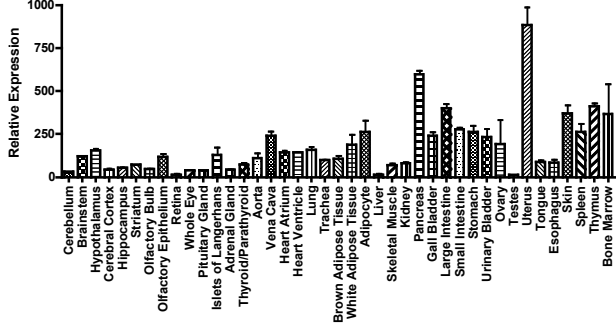

*Ptgrf*

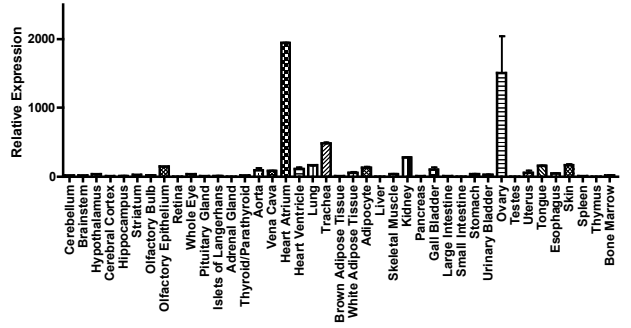

*Ptgir*

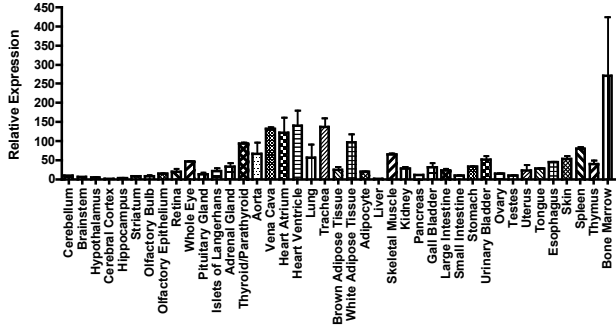

*Pthr1*

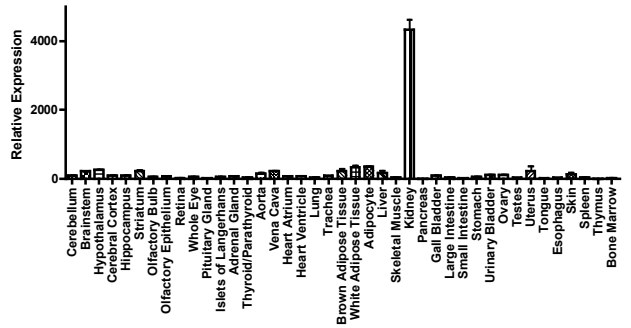

*Pthr2*

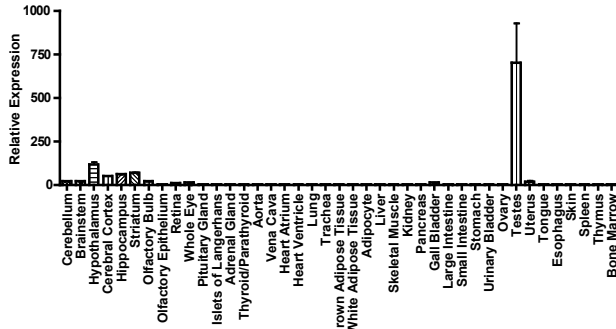

*Rai3*(Gprc5a)

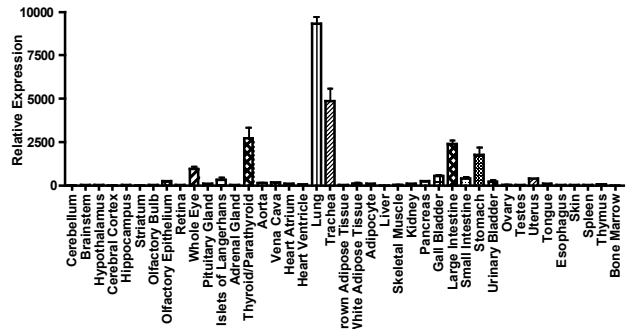

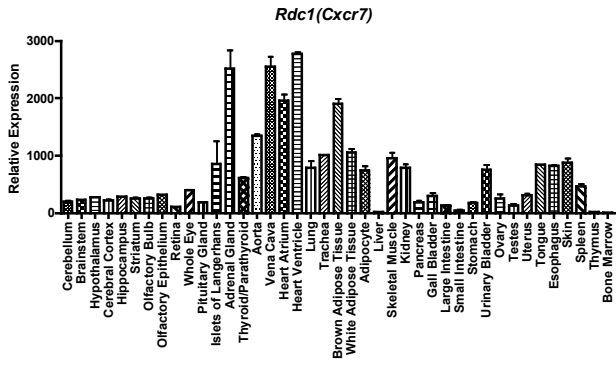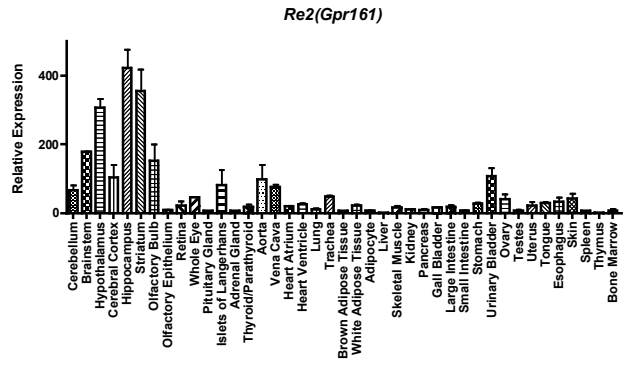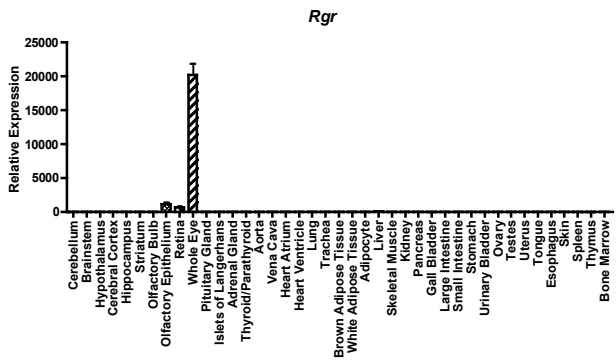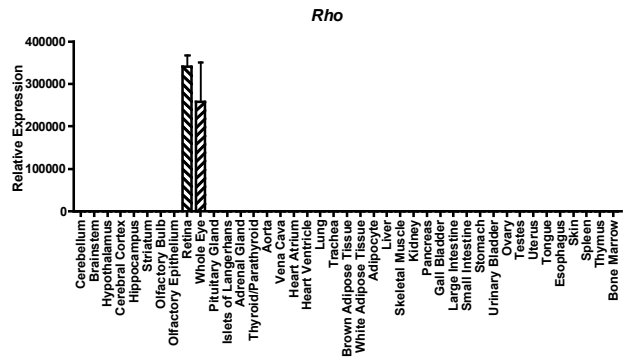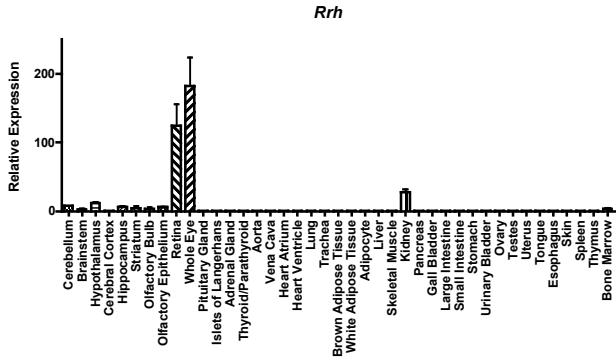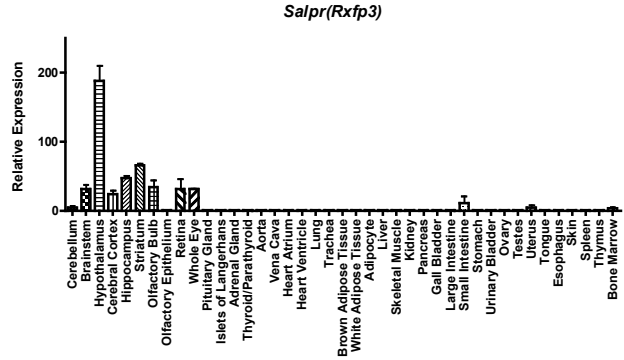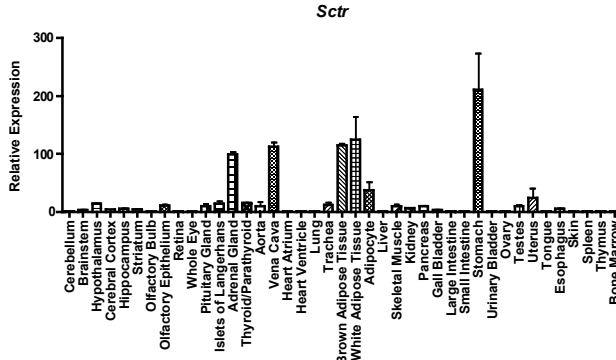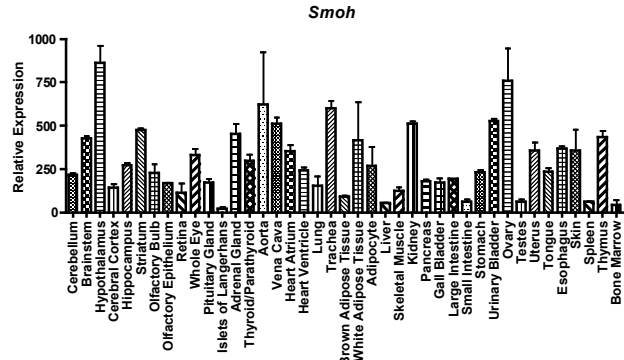



# Regard et al. Mouse GPCRs Page 41

*Sreb3(Gpr173)*

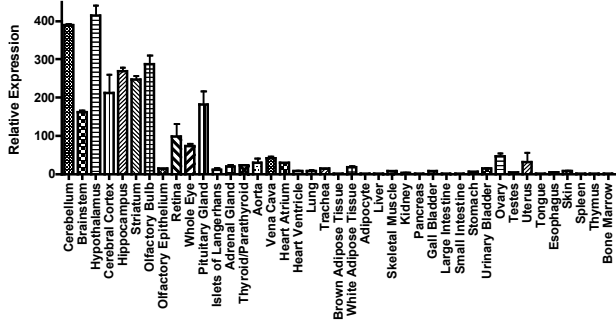

*Sstr1*

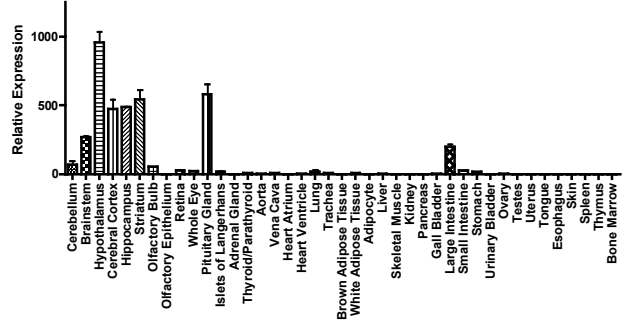

*Sstr2*

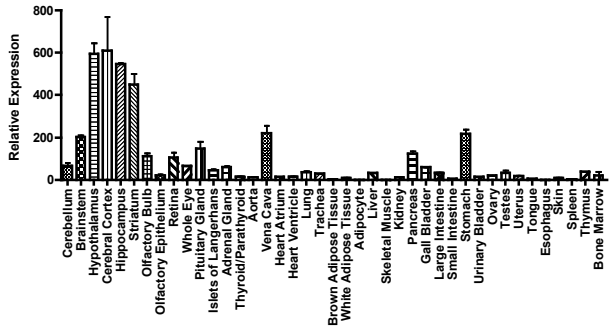

*Sstr3*

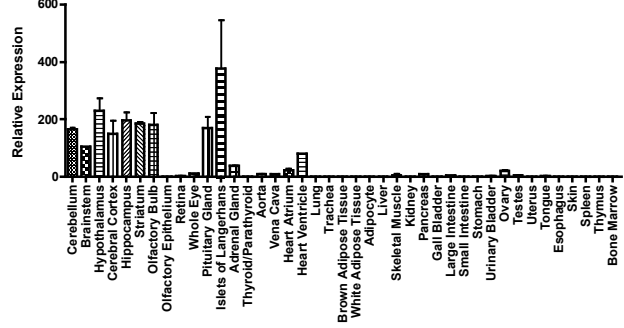

*Sstr4*

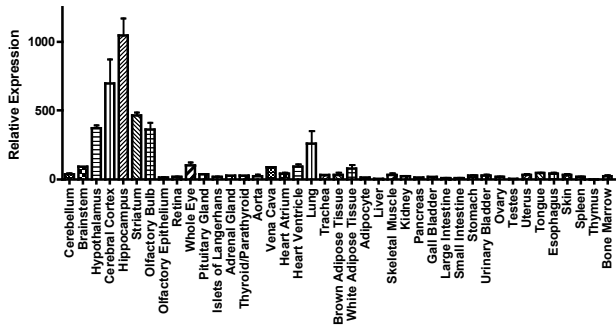

*Sstr5*

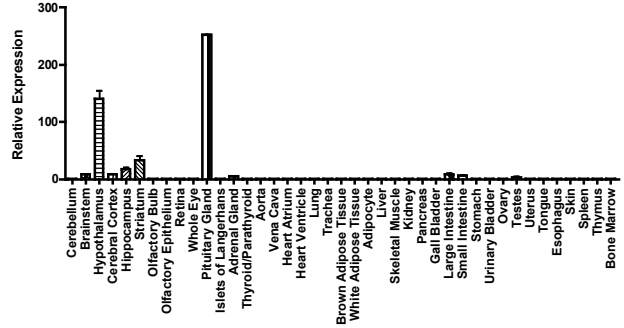

*Ta10(Taar8c)*

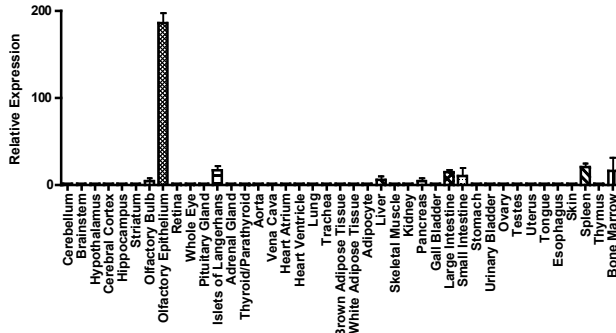

*Ta11(Taar8b)*

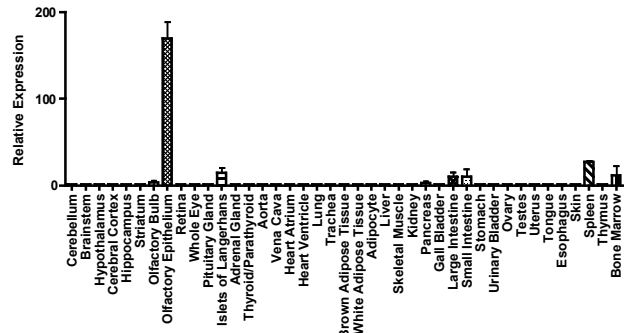

# Regard et al. Mouse GPCRs Page 42

**Ta12(Taar7d)**

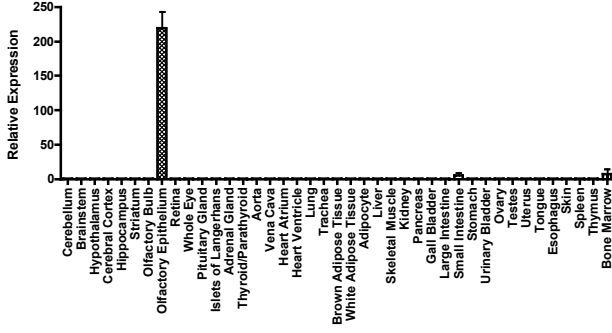

**Ta14(Taar7b)**

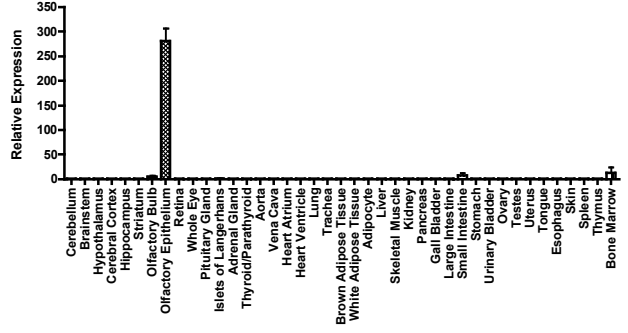

**Ta15(Taar7f)**

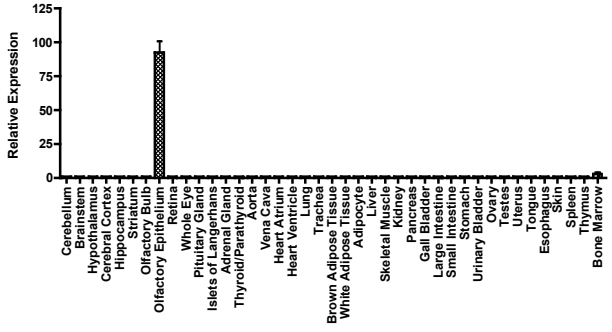

**Ta7(Taar8a)**

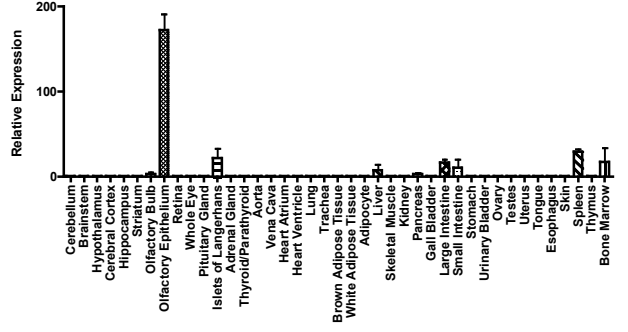

**Ta8(Taar7a)**

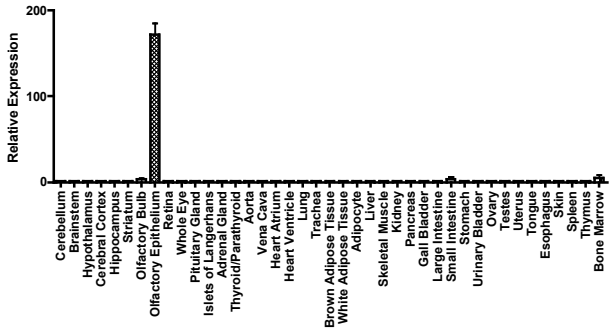

**Tacr1**

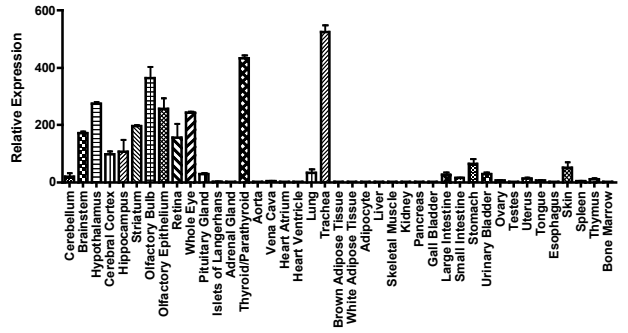

**Tacr2**

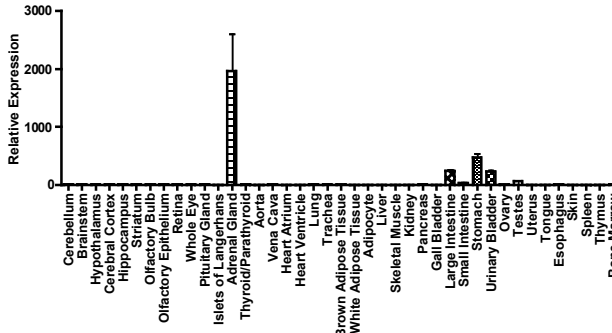

**Tacr3**

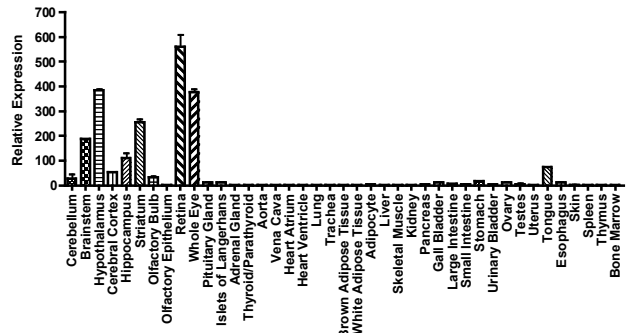

# Regard et al. Mouse GPCRs Page 43

**Tar1(Taar1)**

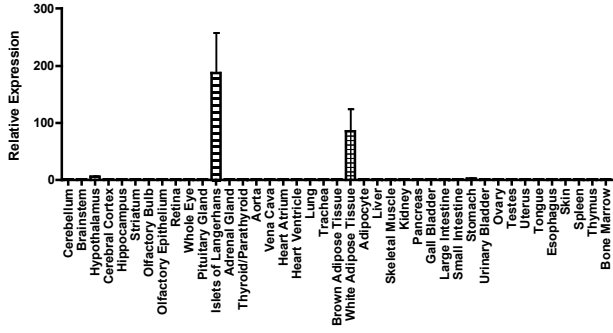

**Tar2(Taar4)**

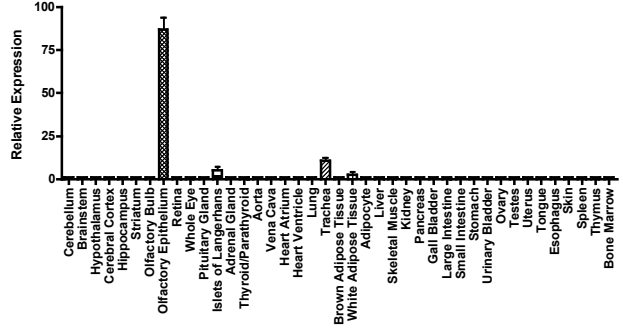

**Tar3(Taar9)**

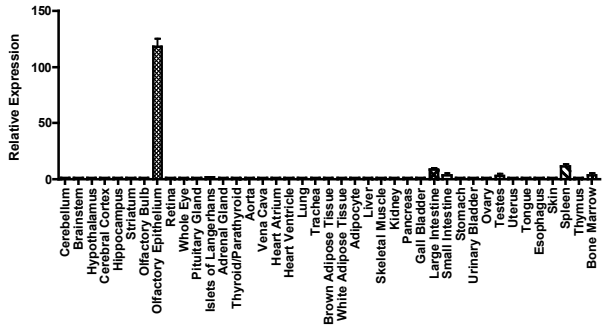

**Tar4(Taar6)**

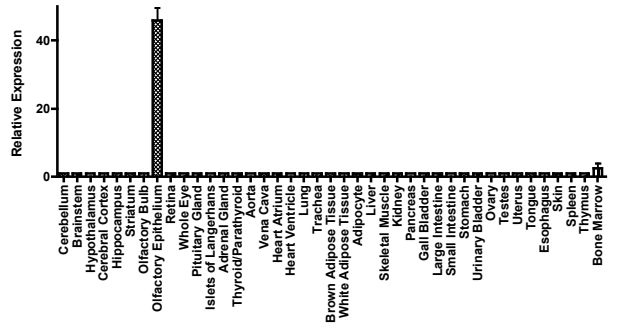

**Tbxa2r**

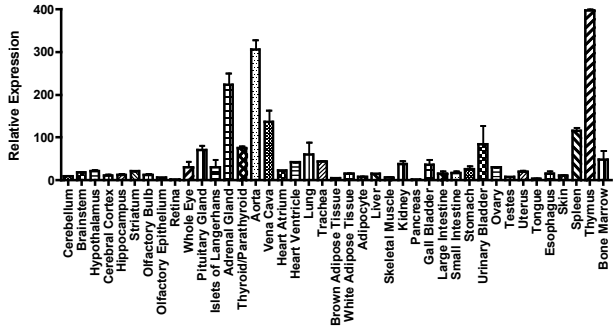

**Tem5(Gpr124)**

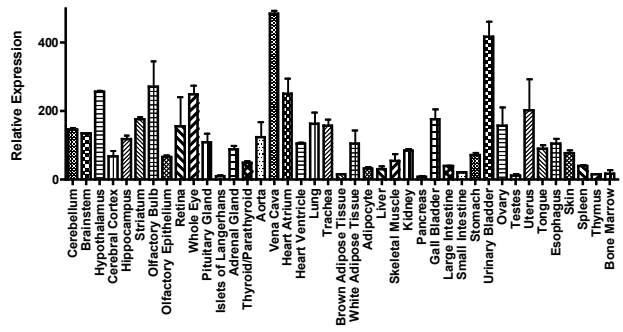

**Tm7sf1(Gpr137b)**

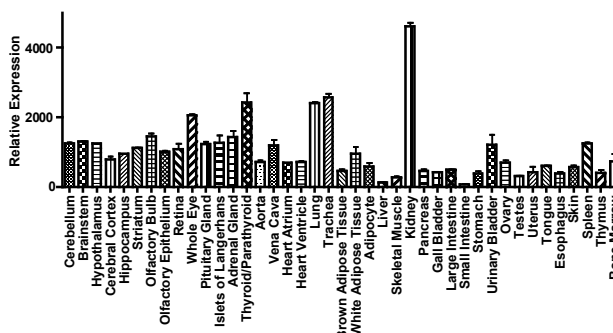

**Tm7sf11(Gpr137)**

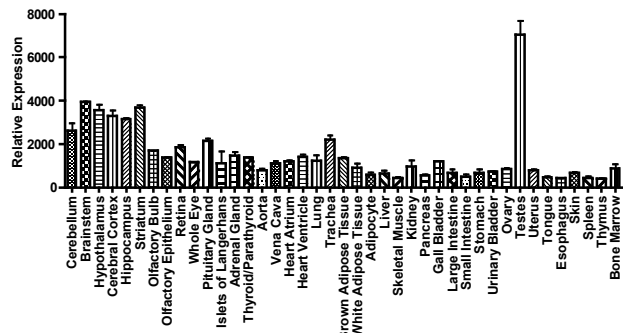

*Tm7sf112*

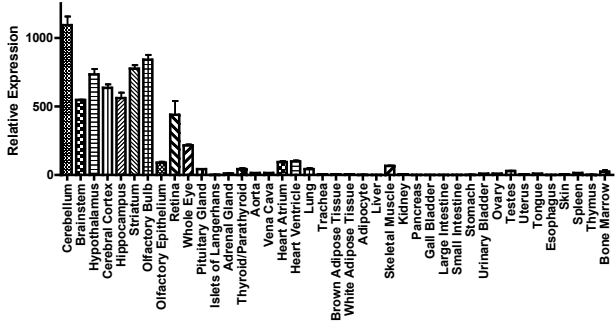

*Tm7sf3*

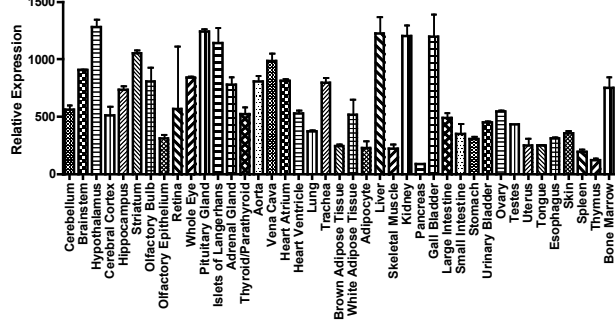

*Tpra40(Gpr175)*

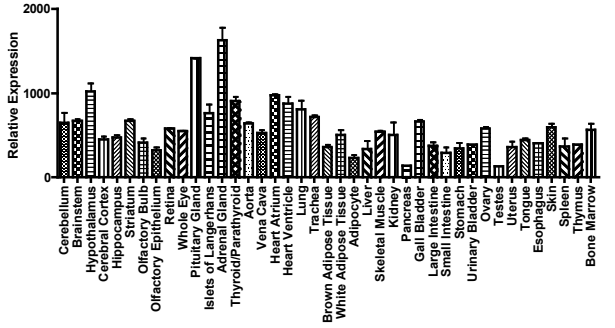

*Trhr*

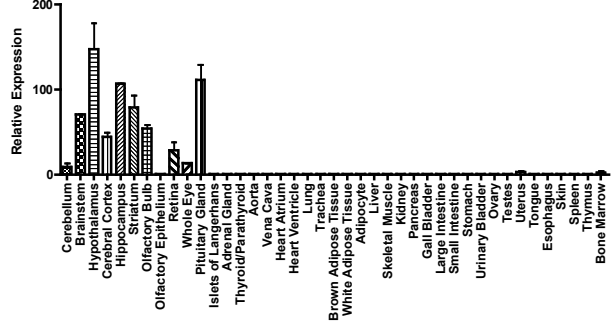

*Trhr2*

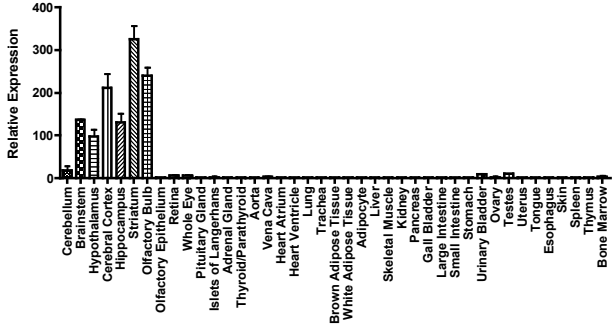

*Tshr*

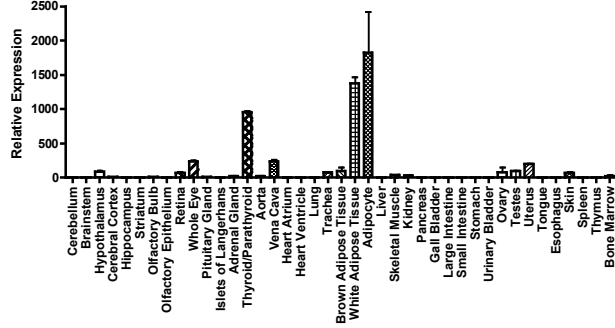

*Vipr1*

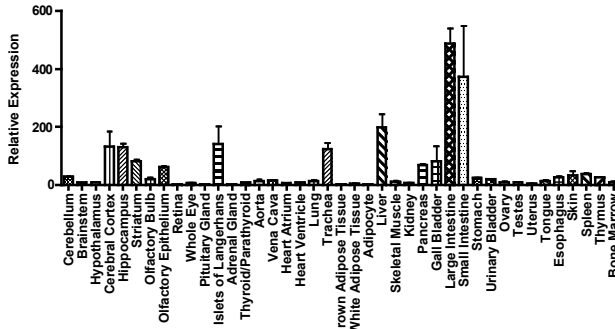

*Vipr2*

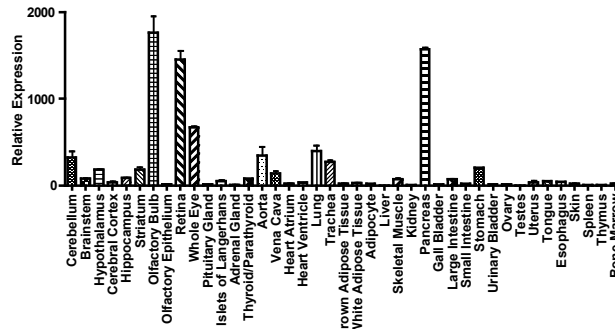

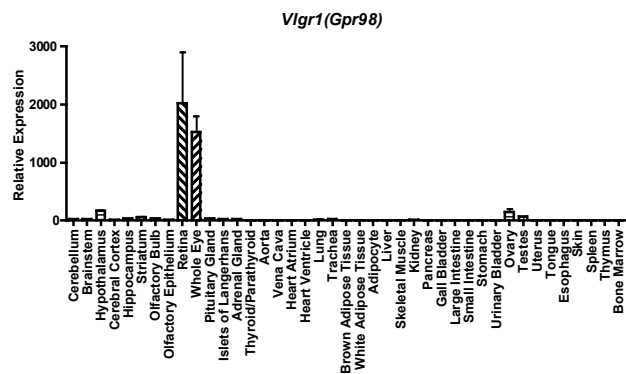

Supplement: NIHMS78317-supplement-02.pdf [file NIHMS78317-supplement-02.pdf]
