# Supplementary material
Source: PubMed Central journal article supplement (PMC2590943)
Supplement: NIHMS78317-supplement-01.pdf [file NIHMS78317-supplement-01.pdf]

## Supplemental Data

# Anatomical Profiling of G Protein-Coupled Receptor Expression

Jean B. Regard, Isaac T. Sato, and Shaun R. Coughlin

**Figure S1. Analysis of off-diagonal Hm74 expression reveals clinically relevant interactions with adipose, immune and barrier clusters**

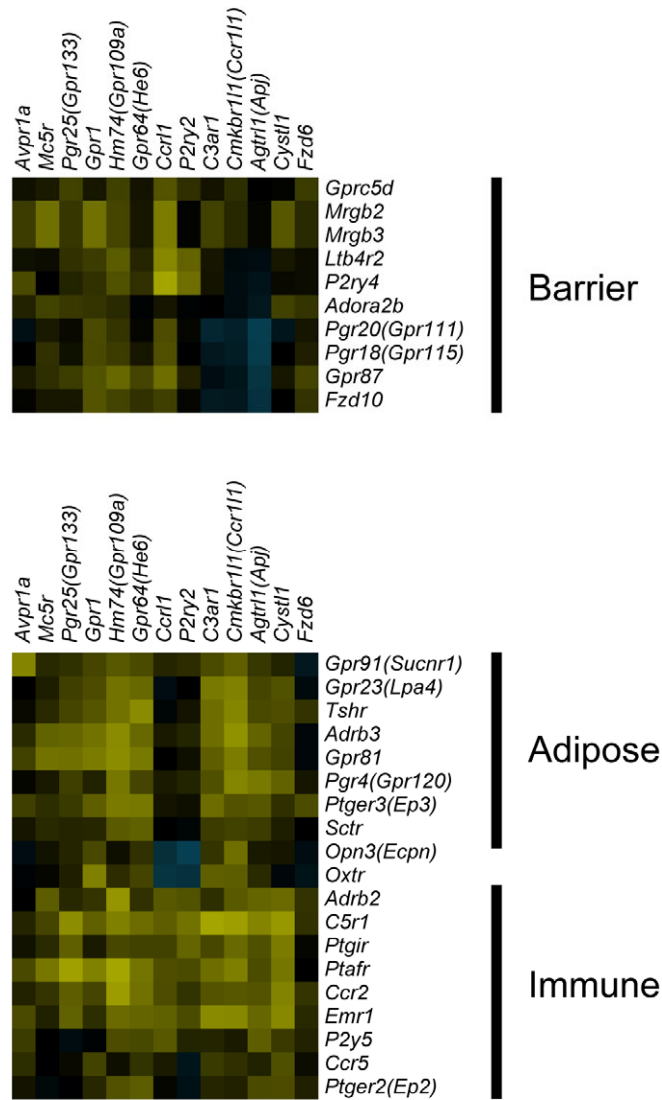

**Table S1. GPCRs with highly restricted expression patterns.**  
The following receptors showed expression in only 1 or 2 tissues.

| <u>Receptor</u> | <u>Genbank Accession</u> | <u>Tissue Expression</u> |
|-----------------|--------------------------|--------------------------|
| Adora3          | NM_009631                | testes                   |
| Adra2b          | NM_009633                | kidney                   |
| Avpr1b          | NM_011924                | islets/pituitary?        |
| Ccr3            | NM_009914                | spleen/bone marrow       |
| Ccr9            | NM_009913                | thymus                   |
| Drd4            | NM_007878                | retina/eye               |
| Fpr-rs2         | NM_008039                | bone marrow              |
| Fshr            | NM_013523                | ovary/testes             |
| Ghrhr           | NM_001003685             | pituitary                |
| Glp2r           | NM_175681                | retina/eye               |
| Gnrhr           | NM_010323                | pituitary                |
| Gpcr150         | XM_977547                | testes                   |
| Gpr15           | XM_156321                | testes                   |
| Gpr41(Ffar3)    | NM_001033316             | islet                    |
| Gpr57(Taar3)    | NM_001008429             | olfactory epithelium     |
| Gpr58(Taar2)    | NM_001007266             | olfactory epithelium     |
| Gpr66(Nmur1)    | NM_010341                | testes                   |
| Gprc6a          | NM_153071                | lung/islets              |
| Grm6(Mglur6)    | NM_173372                | retina/eye               |
| Hgpcr19(Gpbar1) | NM_174985                | gall bladder             |
| Hgpcr2(Gpr119)  | NM_181751                | islets                   |
| Lhcgr           | NM_013582                | ovary/testes             |
| Mrga2           | NM_153101                | testes/bone marrow       |
| Mrga3           | NM_153067                | testes/bone marrow       |
| Mrga5           | NM_207534                | testes/bone marrow       |
| Mrgb3           | NM_207537                | skin                     |
| Mtnr1a          | NM_008639                | testes                   |
| Npy6r           | NM_010935                | urinary bladder          |
| Oa1(Gpr143)     | NM_010951                | eye                      |
| Opn1mw          | NM_008106                | retina/eye               |
| Opn1sw          | NM_007538                | retina/eye               |
| Pgr2(Gpr142)    | NM_181749                | islets                   |
| Pgr23(Gpr113)   | NM_001014394             | testes                   |
| Pgr5(Gpr152)    | NM_206973                | retina/eye               |
| Pnr(Taar5)      | NM_001009574             | olfactory epithelium     |
| Rgr             | NM_021340                | eye/olfactory epithelium |
| Rho             | NM_145383                | retina/eye               |
| Ta10(Taar8c)    | NM_001010840             | olfactory epithelium     |
| Ta11(Taar8b)    | NM_001010837             | olfactory epithelium     |
| Ta12(Taar7d)    | NM_001010838             | olfactory epithelium     |
| Ta14(Taar7b)    | NM_001010827             | olfactory epithelium     |
| Ta15(Taar7f)    | NM_001010839             | olfactory epithelium     |
| Ta7(Taar8a)     | NM_001010830             | olfactory epithelium     |
| Ta8(Taar7a)     | NM_001010829             | olfactory epithelium     |
| Tar1(Taar1)     | NM_053205                | islets/WAT               |
| Tar2(Taar4)     | NM_001008499             | olfactory epithelium     |
| Tar3(Taar9)     | NM_001010831             | olfactory epithelium     |
| Tar4(Taar6)     | NM_001010828             | olfactory epithelium     |
| Vlgr1(Gpr98)    | NM_054053                | retina/eye               |

**Table S2. GPCRs which lack functional Taqman-type primer/probe sets.**  
There is currently no data for these receptors.

| <u>Name</u>   | <u>Description</u>               | <u>Accession #</u> |
|---------------|----------------------------------|--------------------|
| Agtr2         | Angiotensin II receptor          | NM_007429          |
| Avpr1b        | Vasopressin V1b receptor         | NM_011924          |
| Ccr8          | Chemokine receptor 8             | NM_007720          |
| Cmklr1(Dez)   | Chemokine receptor-like 1        | NM_008153          |
| Cystl2        | Cysteinyl leukotriene receptor 2 | NM_133720          |
| Fpr-rs2       | formylpeptide receptor-like 2    | NM_008039          |
| Gpr84         | G protein coupled 84             | NM_030720          |
| Hrh4          | Histamine receptor H4            | NM_153087          |
| Htr4          | 5-HT receptor 4                  | NM_008313          |
| Il8ra(Cxcr1)  | Interleukin-8 receptor A         | NM_178241          |
| Lgr8(Rxfp2)   | Relaxin receptor 2               | NM_080468          |
| Mc1r          | Melanocortin receptor 1          | NM_008559          |
| Mc2r          | Melanocortin receptor 2          | NM_008560          |
| Mrga4         | MAS related A4                   | NM_153524          |
| Mrga7         | MAS related A                    | NM_207535          |
| Mrga8         | MAS related A8                   | NM_207536          |
| Mrgb1         | MAS related B1                   | NM_205810          |
| Mrgb4         | MAS related B4                   | NM_205795          |
| Mrgb5         | MAS related D                    | NM_207538          |
| Mrgd          | MAS related B6                   | NM_203490          |
| Mtnr1b        | Melatonin receptor 1B            | NM_145712          |
| Pgr12(Opn5)   | Neuropsin                        | NM_181753          |
| Pgr28(Gpr156) | G protein coupled 156            | NM_153394          |
