# Supplementary material
Source: PubMed Central journal article supplement (PMC2590943)

Figure S3: Unsupervised hierarchical clustering of GPCRs relative to tissue expression.

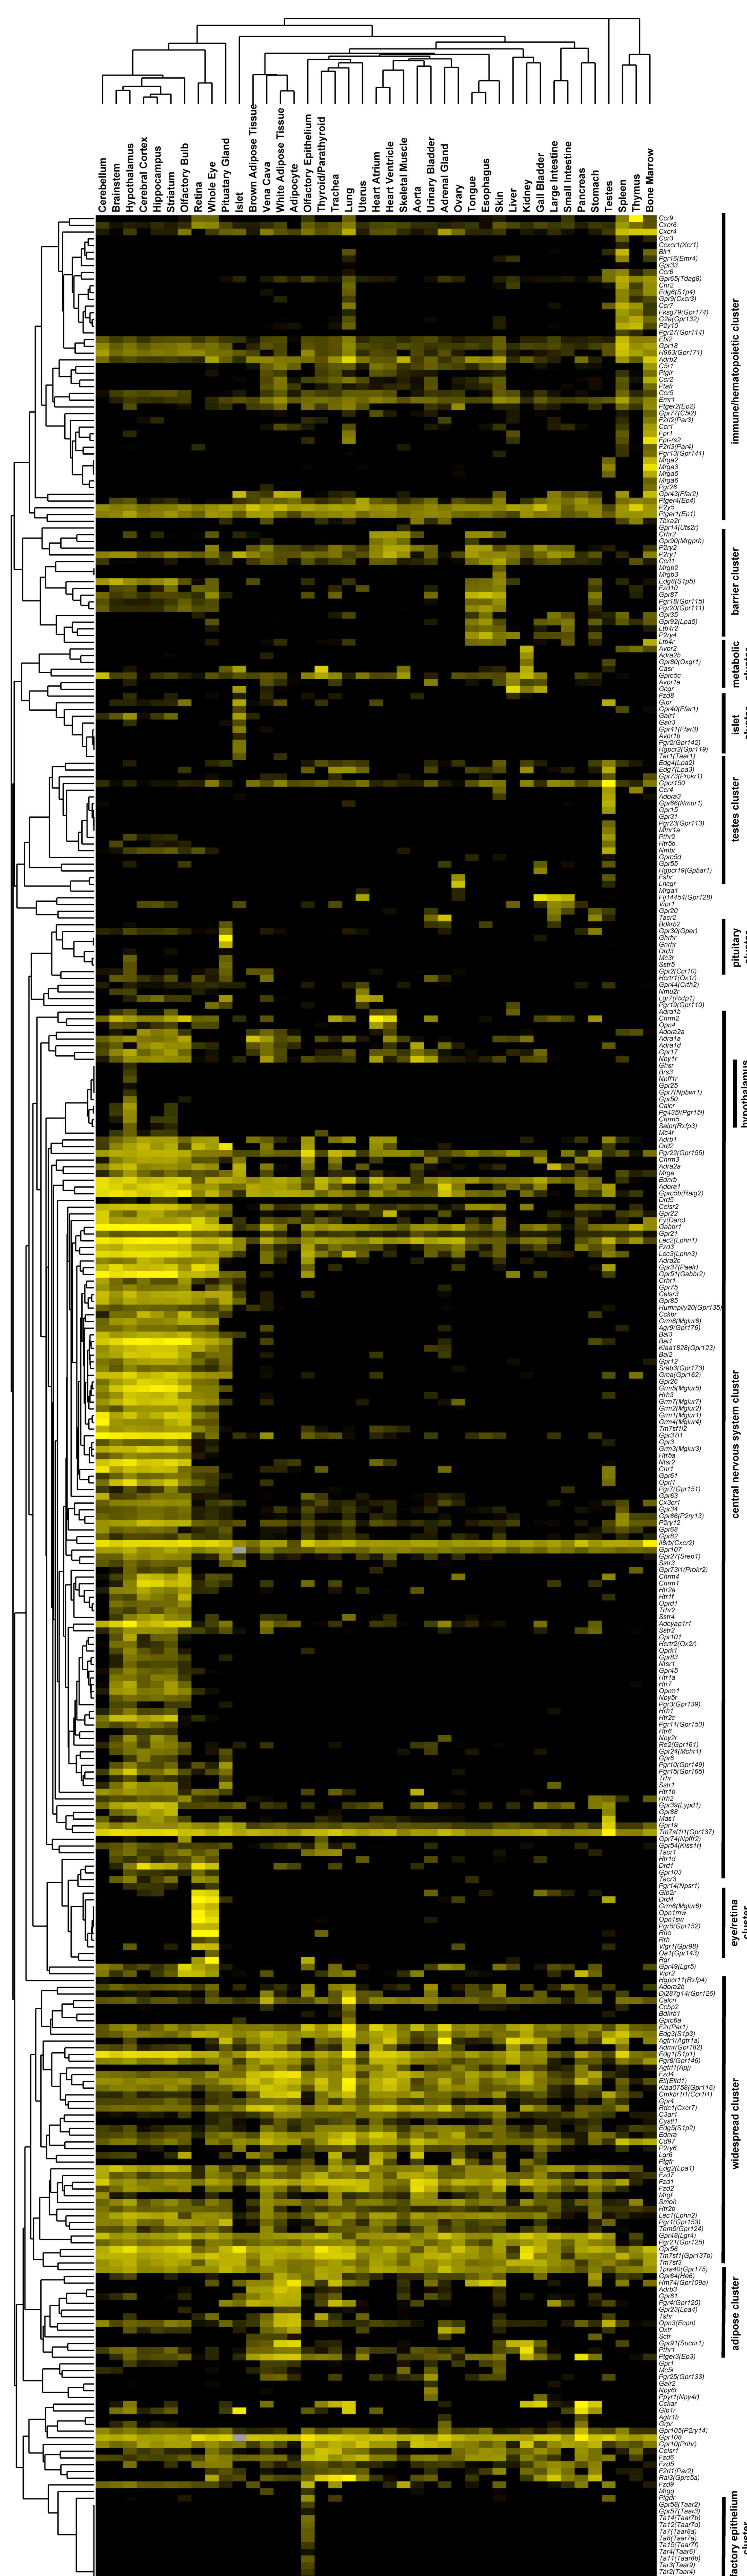

Supplement: NIHMS78317-supplement-03.pdf [file NIHMS78317-supplement-03.pdf]
